# Supplementary material for: The relationships between rugby union, and health and well-being: a scoping review
Source: HighWire-hosted journal article supplement (doi:10.1136/bjsports-2020-102085), 2020-10-28
Supplement: bjsports-2020-102085supp004_data_supplement.xlsx [file bjsports-2020-102085supp004_data_supplement.xlsx]

## Sheet: All Studies
Bibliographic Information				Aims & Methods						Outcomes			Themes
Title	Authors	Year of publication	Country of origin	Aims/purpose	Methodology	Duration of intervention	Intervention type, comparator, details of these (e.g. duration of the intervention) (if applicable)	Study population and sample size (if applicable)	Form of rugby	Outcomes	Emergenct Themes/Concepts	Key findings	New Initial Theme	? Second Theme	Sub-Theme
The physical demands of elite English rugby union	Roberts et al	2008	UK	Provide an assessment of the physical demands of English elite level RU players	Player movements were captured by five distributed video cameras	NA	NA	29 English Premiership level rugby players from same club	Elite Male Rugby Union	Rugby & Physical Activity/Physiologic Demand		Mean time spent in each movement speed range n min:s(forwards & backs respectively). Stand 25:55 vs 23:18. Walk 28:03 vs 36:47. Jog 13:37 vs 13:36. Med run 3:15 (both). High run 0:52 vs 1:19. Sprint 0:20 vs 0.27.	Physical Demand		Activity Profile
Physiological demands of women's rugby union: time-motion analysis and heart rate response	Virr et al	2014	Canada	To quantify movement patterns as well as monitor match heart rates of female premier first division club rugby union athletes	Time-motion analysis and heart rate (HR) response	One match	One match of rugby	Eight (8) premier and first division club level female rugby players volunteered to participate in this investigation. Four (4) were video taped throughout a complete game Heart rates of all 8 athletes were monitored for the entire game	Amateur Female Rugby Union	Rugby & Physical Activity/Physiologic Demand		Women's rugby union is characterised by intermittent bursts of high-intensity activity. Whole game movement category durations in mins (approx.). Stand 20. Walk 35. Jog 10.5. Stride 3. Sprint 2. Static Exertion 8.	Physical Demand		Activity Profile
The use of Global Positioning System (GPS) tracking devices to assess movement demands and impacts in Under-19 Rugby Union match play: sports technology	Venter et al	2011	South Africa	To use GPS technology to obtain information on elite Under-19 rugby union forward and back players with regard to movement patterns, as well as impacts from collisions experienced by players	GPS data	Five matches	Five matches	Seventeen Under-19 male rugby players from a provincial rugby institute in Stellenbosch, South Africa	Elite Academy Rugby Union	Rugby & Physical Activity/Physiologic Demand		1) Players covered on average a total distance of 4469.95 ± 292.25 m during a game . Percentage time spent in speed zones: Standing: consistently approx. 20-21% Walking: 42-60% Jogging: 16-26% Striding: 3-10% Sprinting: 0.4-1%	Physical Demand		Activity Profile
GPS comparison of training activities and game demands of professional rugby union	Tee et al	2016	South Africa	To determine the specificityof typical training activities in rugby union, by com-parison with the demands of match-play	GPS	Players were monitored during 96 training sessions overa 25-month period from September 2011 to October 2013. Training session activities were compared to datafrom 24 matches played by the same team during the2013 rugby seaso	NA	Fifty-three male rugby union players (age 25_x0003_3 years,stature 186_x0003_7 cm and body mass 101.5_x0003_12.2 kg),representing a professional South African rugby team	Elite Male Rugby Union	Rugby & Physical Activity/Physiologic Demand		Total distance covered: 5050±1636m.	Physical Demand		Activity Profile
Quantification of activity during wheelchair basketball and rugby at the National Veterans Wheelchair Games: A pilot study	Sporner et al	2009	USA	To provide quantitative information of selected characteristics of wheelchair basketball and rugby game play	An MDL (mini data logger) was installed on a wheel of eachathlete’s sports wheelchair to record time stamped wheel rotation data during thetournamen	Wheelchair rugby games at National Veterans Wheelchair Games	Wheelchair rugby games at National Veterans Wheelchair Games	18 individuals who participated in wheelchair rugby at the 2007 and 2008 NVWG	Wheelchair Rugby	Rugby & Physical Activity/Physiologic Demand		The results of this study show that the majority (475%) of the wheelchair athletesin this study (n¼14 rugby,n¼16 basketball) reach the CDC recommended 20 min ofactivity during a wheelchair basketball or rugby game. The benefits of participating inorganized sporting events and recreation have been well documented17and promotingparticipation in wheelchair basketball and rugby may influence activity…	Physical Demand		Activity Profile
A Comparison of the Match Demands of International and Provincial Rugby Sevens	Ross et al	2015	NZ	To compare the running demands and match activity profiles of international and provincial rugby sevens players.	Global positioning system analysis was completed during international and provincial tournament matches. Video analysis was also used to quantify the individual match activities during tournament matches.			84 rugby sevens players, consisting of 16 international players from 1 team and 68 provincial players from 8 teams.	Elite Male 7s	Rugby & Physical Activity/Physiologic Demand		These findings demonstrate that both physical and technical factors distinguish international and provincial rugby sevens, although overall match demands are similar. Running demands of provincial & international players: 105m/min. Internationals covered greater distance at very high speed (ES = 0.30) and performing a greater number of sprints (ES = 0.80).	Physical Demand		Activity Profile
The match demands of international rugby sevens	Ross et al	2015	NZ	The purpose of this study was to quantify the global match demands of international rugby sevens and to compare the match demands of forwards and backs, and between tournament rounds.	To assess the match demands, global positioning system (GPS) and video analysis were collected from 27 international rugby sevens players from the same team across an entire International Rugby Board Sevens World Series season	One international sevens season	NA	27 players split into forwards (N = 12, age 24.4 ± 3.3 years; height 188 ± 4.8 cm; mass 95.4 ± 6.3 kg) and backs (N = 15, age 23.3 ± 2.9 years; height 183 ± 4.2 cm; mass 89.7 ± 5.9 kg) from the same international male rugby sevens team. Players made 406 appearances in 54 matches played in nine tournaments during the 2012–13 IRB Sevens World Series.	Elite Male 7s	Rugby & Physical Activity/Physiologic Demand		When compared to an 80 min 15-a-side rugby union match, over the course of a tournament rugby sevens starters cover ~51% and ~82% greater total distance, (backs and forwards, respectively). Per match running demands (pool & cup respectively)(m): 1446 ± 299 & 1423 ± 285	Physical Demand		Activity Profile
Investigation of anthropometric and work-rate profiles of Rugby Sevens players.	Rienzi et al	1999	Uruguay	To describe anthropometric and match performance profiles of international Rugby Sevens players and explore correlations between anthropometric characteristics and work-rates in matches.	Profiles (work-rate analysis during matches (n = 30) and a comprehensive anthropometry profile of 27 of the 30 players) of 30 male players participating in the 1996 International Rugby Sevens tournament in Uruguay were compared by means of multivariate analysis and correlation techniques.	30 matches	NA	30 male players	Elite Male 7s	Rugby & Physical Activity/Physiologic Demand		The average game duration was 1064±152s, whilst the amount of time spend in activity during each game was 861±143s – 81% of total time.	Physical Demand		Activity Profile
The physical characteristics of match-play in English schoolboy and academy rugby union	Read et al	2018	UK	The aim was to compare the physical characteristics of under-18 academy and schoolboy rugby union competition by position	Using a microsensor unit, match characteristics were recorded in 66 players. Locomotor characteristics were assessed by maximum sprint speed (MSS) and total, walking, jogging, striding and sprinting distances	Anentireseason of academy matches were assessed (six117matches), withamatchednumberof school games.	Anentireseason of academy matches were assessed (six117matches), withamatchednumberof school games.	66p layers were recruited from two playing standards (regional academy and schools)	Youth Male Rugby Union	Rugby & Physical Activity/Physiologic Demand		Forwards from the academy (5461 263± 360 m) and school (4881 ± 388 m). Backs from the academy (5639 ± 368 m) and school (5260 ± 441 265m)	Physical Demand		Activity Profile
Movement and physical demands of school and university rugby union match-play in England	Read et al	2016	UK	To explore the movement and physical demands of the sport and how they progress by age	Ninety-six male rugby union players wore microtechnology devices during six rugby union matches within the education pathway to investigate the movement and physical demands of match-play. To quantify the positional differences and progression by age, data were obtained for participants at the under 16 (U16) (n=31 participants), under 18 (U18) (n=34 participants) and university (n=31 participants…	NA	NA	NA	Youth Male Rugby Union	Rugby & Physical Activity/Physiologic Demand		Range of match-play data for adolescent male rugby union players (U16-18s, forwards & backs). Total distance: 3884-5889m (increases with age).	Physical Demand		Activity Profile
Positional demands of international rugby union: evaluation of player actions and movements	Quarrie et al	2013	NZ	To analyse movements and activities of players in international rugby union matches with a sample size sufficient to clearly delineate positional roles.	Actions of 763 players were coded from video recordings of 90 international matches played by the New Zealand national team (the All Blacks) from 2004 to 2010. Movements of players were coded for 27 of these matches via a semi-automated player-tracking system. Movements and activities of all players from both teams were coded.	NA	NA	NA	Elite Male Rugby Union	Rugby & Physical Activity/Physiologic Demand		The typical distance moved during active time for a full match ranged from 3700 m for Number 8 forwards through to 4500 m for scrum-halves. Active time per match was 36:21 ± 2:40 min:s (mean ± sd).	Physical Demand		Activity Profile
Sports game play: a comparison of moderate to vigorous physical activities in adolescents	Patience et al	2013	USA	The purpose of this study was to compare traditional team sport activities with flag rugby	We studied 101 (55 males; 46 females, age 11-14) students who participated in flag football (FF), basketball (BB), and flag rugby (FR). Activity counts were collected using accelerometers. Perceived competence and enjoyment were measuredusing the intrinsic motivation inventory				Other	Other (please add to emergent themes)	Multiple Themes	The differences found among the three sports in this study demonstrated that FR is on average more enjoyable than BB and FF. FR appears to be more vigorous and participants felt more competent in the game. It is presumed that the participants may have felt more competent in FR game because it was easy to learn and had relatively few rules. Additionally, results related to MET values indicate that…	Physical Demand	Mental Health and Function	Activity Profile
Analysis of the physical demands of international rugby union	McLean	1992	UK	The aim of this study was to investigate the physical demands of international rugby union	Five games in the 1989-90 Five Nations Championship were analysed using video-recordings of live television transmissionsn and time-motion analysis was used to quantify demands. The density of work was measured by timing the work:rest ratios (W:RRs) throughout each game.				Elite Male Rugby Union	Rugby & Physical Activity/Physiologic Demand		When the ball was in open play, the average running pace of players central to the action ranged from 5 to 8 m s-1. This together with scrum, lineout, ruck and maul was classified as high-intensity exercise. The mean duration of the work periods was 19 s and the most frequent W:RRs were in the range of 1:1 to 1:1.9. The ball was in play for an average of 29 min during a scheduled time of play of …	Physical Demand		Activity Profile
Group cohesion as a contributor to participation in adaptive sport among adults with spinal cord injury and other health conditions	Lydick	2017	USA	To characterize: 1) the relationships between group cohesion and leisure time physical activity (LTPA) among adults with spinal cord injury (SCI) or other health conditions that limit mobility and who participate in adaptive sport 2) between self-efficacy for exercise and social support for exercise in this subpopulation, and 3) to describe the level of leisure time physical activity being achiev…	This was a cross-sectional study that included 107 adult participants, 57 of whom reported SCI. Self-report measures were administered to assess group cohesion, social support for exercise, and self-efficacy for exercise as primary predictors, as well as certain demographic, health and athletic background data as potential covariates. LTPA was assessed as the primary outcome variable. Time with t…				Wheelchair Rugby	Rugby & Physical Activity/Physiologic Demand		Group cohesion is associated with LTPA in adults with severe mobility limitations who participate in adaptive sport and provides an important focus for future study of physical activity maintenance among groups at high risk for hypoactive lifestyle. Persons with mobility limitations who participate in adaptive sport may be achieving LTPA levels that are recommended for achieving health and fitnes…	Physical Demand		Activity Profile
Quantifying positional and temporal movement patterns in professional rugby union using global positioning system	Jones et al	2015	UK	To assess the positional and temporal movement patterns of professional rugby union players during competition using global positioning system (GPS) units	GPS data were collected from 33 professional rugby playersfrom 13 matches throughout the 2012–2013 season sampling at 10 Hz. Players wore GPS units from which informationon distances, velocities, accelerations, exertion index, player load, contacts, sprinting and repeated high-intensity efforts(RHIE) were derived. Data files from players who played over 60 min (n= 112) were separated into five po…				Elite Male Rugby Union	Rugby & Physical Activity/Physiologic Demand		Up to 20 bouts of repeated high intensity exercise bouts in course of a whole game	Physical Demand		Activity Profile
Motion analyses of adolescent rugby union players: a comparison of training and game demands	Hartwig et al	2011	Australia	The aim of this study was to describe and compare the game demands and on-field training practices of adolescent rugby union players using time-motion analyses. A second aim was to compare the physiological demands of different player positions.	Between 2003 and 2008, 118 male adolescent rugby players aged 14 to 18 years were recruited from 10 teams representing 3 levels of adolescent rugby. Timemotion analyses using global positioning satellite tracking devices (SPI10; GPSports Systems Pty Ltd 2003) and computer-based tracking software (Trak Performance; Sports Tec Pty Ltd) applied to video footage determined player movement patterns 16…				Elite Academy Rugby Union	Rugby & Physical Activity/Physiologic Demand		Percentage of the time in various speed states (forwards vs backs): Stationary: 44.5 vs 32.7% Walking 35.5 vs 48.8% Jogging 14.5 vs 13.6% Striding 3.6 vs 3.1% Sprinting 0.9 vs 1.3%	Physical Demand		Activity Profile
Movement Demands of Elite Under-20s and Senior International Rugby Union Players	Cunningham et al	2016	UK	This study compared the movement demands of elite international Under-20 age grade (U20s) and senior international rugby union players during competitive tournament match play	Forty elite professional players from an U20 and 27 elite professional senior players from international performance squads were monitored using 10Hz global positioning systems (GPS) during 15 (U20s) and 8 (senior) international tournament matches during the 2014 and 2015 seasons. Data on distances, velocities, accelerations, decelerations, high metabolic load (HML) distance and efforts, and numb…				Other	Rugby & Physical Activity/Physiologic Demand		Movement Characteristics for Senior & U20 forards & backs. Total distance: 5.37-6.36km. High Speed Running: 263-656m.	Physical Demand		Activity Profile
Physical game demands in elite rugby union: a global positioning system analysis and possible implications for rehabilitation	Coughlan et al	2011	Ireland	To evaluate the physical demands of an international Rugby Union-level game using a global positioning system (GPS).	GPS data from 2 players, a back and a forward, were collected during an international Rugby Union game. Locomotion speed, total body load, and body load sustained in tackles and scrums were analyzed.				Elite Male Rugby Union	Rugby & Physical Activity/Physiologic Demand		The back covered a greater overall distance (7002 m) compared to the forward (6427 m). Players completed almost 75% of the total match distance in lower intensity activities (standing, nonpurposeful movements, walking, or jogging).	Physical Demand		Activity Profile
Movement Patterns and Metabolic Responses During an International Rugby Sevens Tournament	Couderc et al	2017	France	To investigate the running demands and associated metabolic perturbations during an official rugby sevens tournament.	Twelve elite players participated in 7 matches wearing GPS units. Maximal sprinting speed (MSS) and maximal aerobic speed (MAS) were measured. High-intensity threshold was individualized relative to MAS (>100% of MAS), and very-high-intensity distance was reported relative to both MAS and MSS. Blood samples were taken at rest and after each match.				Elite Male Rugby Union	Rugby & Physical Activity/Physiologic Demand		Mean relative total distance covered was 91 ± 13 m/min with ~17 m/min at high-intensity.	Physical Demand		Activity Profile
Repeated High-Intensity Effort Activity in International Male Rugby Sevens	Couderc et al	2019	France	The aim of this study was to analyze the RHIE profile during Rugby Sevens matches and to determine how this profile differed among playing positions and across the course of a game.	In this study, 15 elite players competed in 44 matches during the HSBC World Sevens Series. Global positioning systems and match analysis software were used to quantify the frequency of repeated running and collision efforts. High acceleration ($2.5 m$s22), high speed (above maximal aerobic speed), sprint (above 85% of maximal sprint speed), and collision efforts (tackles, ruck, and contact) were…				Elite Male Rugby Union	Rugby & Physical Activity/Physiologic Demand		On average, players performed 27 high-intensity effort events across the game. In addition, although Rugby Sevens match-play duration is much shorter, the frequency of RHIE bouts observed in this study (1 bout every 3.8 minutes) was higher than previously reported in elite Rugby League (for hit-up forwards, 1 bout every 4.8 minutes)	Physical Demand		Activity Profile
Game movement demands and physical profiles of junior, senior and elite male and female rugby sevens players	Clarke et al	2017	Australia	The aim of this study was to quantify the game runningmovement patterns and the anthropometric and physicalcharacteristics of male and female rugby sevens players across3 tiers of playing levels (junior, senior, and elite). Relationshipsbetween game movements and anthropometric and physicalassessments were also quantified.	Anthropometric and physical testing (40 m sprint, vertical jump, Yo-Yo IR1) occurred prior to players’ national championships or international tournaments (n = 110 players), while game movements were obtained via GPS (n = 499 game files).				Other	Rugby & Physical Activity/Physiologic Demand		Mean game total distance covered (male & female, junior, senior & elite): 1080-1249m	Physical Demand		Activity Profile
Physiologically based GPS speed zones for evaluating running demands in Women's Rugby Sevens	Clarke et al	2015	Australia	The aim of this study was to establish, for international Women’s Rugby Sevens players, a physiologically defined threshold – speed at the second ventilatory threshold (VT2speed) – for the analysis of high-intensity running, using mean and individualised thresholds.	Game movement patterns (using 5 Hz GPS) of 12 international Women’s Rugby Sevens players (23.5 ± 4.9 years, 1.68 ± 0.04 m, 68.2 ± 7.7 kg; mean ± s) were collected at an international tournament. Seven of these players also completed a treadmill VO2max test to estimate VT2speed.				Elite Female Rugby Union	Rugby & Physical Activity/Physiologic Demand		Total game distance covered: 916 – 1140m	Physical Demand		Activity Profile
The movement characteristics of English Premiership rugby union players	Cahill et al	2013	UK	The purpose of this investigation was to quantify the movement characteristics of elite rugby union players during competitive play and identify whether position-related differences exist.	Ninety-eight elite players from eight English Premiership Clubs were tracked using global positioning systems (GPS) during 44 competitive matches throughout the 2010/2011 season. Player positions were defined as: (1) Backs or Forwards; (2) Front, Second and Back Rows, Scrum Half, Inside and Outside Backs; (3) 15 individual positions (numbers 1–15).				Elite Male Rugby Union	Rugby & Physical Activity/Physiologic Demand		Median total distance covered: forwards 5850m vs backs 6545m	Physical Demand		Activity Profile
Intensity level and on-court role of wheelchair rugby players during competition	Borel et al	2019	France	This study aims at quantifying the level of physical activity of wheelchair rugby players during matches in order to compare defensives players (DP) and offensives players (OP) profiles	Fifty-two players, including 24 DP and 28 OP (mean age of 34±9 years), from eight French teams involved in the national elite championship and in the French national cup, participated. The seven wheelchair rugby players’ classes were differentiated from 0.5 points (most severe deficiencies) to 3.5 points (less severe deficiencies). DP and OP were regrouped from 0.5 to 1.5 points and from 2 to 3.5…				Wheelchair Rugby	Rugby & Physical Activity/Physiologic Demand		Statistical analysis between DP and OP showed a significant difference in vigorous activity time with a higher vigorous activity time for OP than DP; P<0.007), associated with higher mean intensity level for OP vs. DP (4.3±1.0 METs vs. 3.8±0.9 METs respectively; P=0.049). No significant differences between DP and OP were found for active energy expenditure (385±158 kcal vs. 446±199 kcal, for DP a…	Physical Demand		Activity Profile
Comparison of Game Movement Positional Profiles Between Professional Club and Senior International Rugby Union Players	Beard et al	2019	UK	The purpose of this study was to compare the game movement demands between professional club and senior international rugby union players.	Data were obtained from 188 players from 4 professional club teams (Rabo Direct Pro12) and the affiliated international team during the 2014–15 season. Players were tracked by global positioning system (GPS) sampled at 10 Hz and were categorized into 6 different positional groups (front row forwards, FRF; second row forwards, SRF; back row for-wards, BRF; half backs, HB; centres, C; outside backs…				Elite Male Rugby Union	Rugby & Physical Activity/Physiologic Demand		Mean total distance covered varies according to positions & level (club vs international): 4689m – 7229m	Physical Demand		Activity Profile
The physical demands of Super 14 rugby union	Austin et al	2011	Australia	The aim of the current review was to systematically evaluate the available evidence on concussion in Rugby Union and to conduct a meta-analysis of findings regarding the incidence of concussion.	he movements of 20 players from Super 14 rugby union team during the 2008 and 2009 seasons were video recorded. Methods Using time-motion analysis (TMA), five players from four positional groups (front-row forwards, back-row forwards, inside backs and outside backs) were assessed.				Elite Male Rugby Union	Rugby & Physical Activity/Physiologic Demand		Players covered between 4218 m and 6389 m during the games. The maximum distances covered in a game by the four groups were: front row forwards (5139 m), back row forwards, (5422 m), inside backs (6389 m) and outside backs (5489 m). The back row forwards spent the greatest amount of time in high-intensity exercise (1190 s), followed by the front row forwards (1015 s), the inside backs (876 s) and…	Physical Demand		Activity Profile
Metabolic equivalent (MET) intensities of culturally-specific physical activities performed by New Zealanders	Moy et al	2006	NZ	This study's purpose was to objectively measure the intensity, expressed as metabolic equivalents (METs), of free-living physical activities (PAs) performed by New Zealanders	A sample of 186 European/Other (n=60), Maori (n=61), and Pacific (n=65) males and females (mean age 48.6 plus or minus 16.4 yrs) underwent 3 days of minute-by-minute heart rate monitoring (HRM) with individual calibration on a cycle ergometer. Mean METs were derived from average heart rate readings and compared to published equivalents from the United States (US) Compendium of Physical Activities.				Amateur Male Rugby Union	Rugby & Physical Activity/Physiologic Demand		METs Rugby, union, team, competitive 8.3 (8.1–8.5). METs Rugby, touch, non-competitive 6.3 (5.6-7.2)	Physical Demand		Activity Profile
Energy expenditure in ball games for wheelchair users	Abel et al	2008	Germany	The purpose of this study was to evaluate the EE of individuals with spinal cord injury in ball games for wheelchair-dependent persons.	Fourteen tennis players (WT), 10 basketball players (WB) and 12 rugby players (WR) completed a basal metabolism evaluation and a training test to measure respiratory parameters.				Wheelchair Rugby	Rugby & Physical Activity/Physiologic Demand		The mean value of energy expenditure of all wheelchair-dependent athletes was 313.6±101.14 kcal h−1. The values of the rugby players showed significantly lower values of energy expenditure in comparison to the values of the tennis and basketball athletes. There was a significant but poor relationship between the lesion level and the energy expenditure (r=0.49). The lactate values showed no signif…	Physical Demand		CV/Met/Imm Demand
Movement and physiological demands of international and regional men's touch Rugby matches	Beaven et al	2014	UK	To compare the internal and external match demands imposed on international and regional standard male touch rugby players	The study adopted a cohort design with independent groups. Twelve international players (mean age 27.8 ± 6.2 y, body mass 72.8 ± 3.7 kg, stature 174.5 ± 5.4 cm) and nine regional players (mean age 25.5 ± 5.5 y, body mass 74.2 ± 7 kg, stature 174.1 ± 7 cm) were analysed during nine competitive matches from the 2013 season. Movement demands were measured using a 5 Hz global positioning system (GPS)…				Other	Rugby & Physical Activity/Physiologic Demand		During matches international players performed at lower percentages of their peak heart rate compared to national players (80.6 ± 4.3 cf. 83.5 ± 5.1%, respectively). Total distance 1) International players: 2265.8 ± 562.3 2) Regional players: 2970.6 ± 558.9	Physical Demand		CV/Met/Imm Demand
The ball in play demands of international rugby union	Pollard et al	2018	UK	To analyse movements and activities of players in international rugby union matches with a sample size sufficient to clearly delineate positional roles.	A total of 88 GPS files from eight international test matches were collected during 2016. An Opta sportscode timeline was integrated into the GPS software to split the data into BiP periods. Metres per min (mmin<sup>-1</sup>), high metabolic load per min (HML), accelerations per min (Acc), high speed running per min (HSR), and collisions per min (Coll) were expressed relative to BiP periods and o…	Eight matches	Eight matches	22 international rugby players	Elite Male Rugby Union	Rugby & Physical Activity/Physiologic Demand		Running demands across whole match: 67.6m/min. 5.5 bouts of high-speed running per minute per match.	Physical Demand		CV/Met/Imm Demand
Effects of rugby sevens matches on human neutrophil-related non-specific immunity	Takahashi et al	2007	Japan	To evaluate the influences of the accumulative effect of two consecutive rugby sevens matches (Sevens) on aspects of human neutrophil-related non-specific immunity	Neutrophil reactive oxygen species (ROS) production capability and phagocytic activity were measured using flow cytometry, and serum opsonic activity (SOA) was assessed by measuring neutrophil ROS using the peak height of lucigenin-dependent chemiluminescence before and after two consecutive matches	Two consecutive sevens matches	The mean (SD) participation times in each match were 10.3 (4.2) and 10.0 (4.3) min, respectively	Seven players of the Japan Sevens squad, with an average age (standard deviation (SD)) of 20.7 (1.3) years. The body weight and height of the subjects were 86.4 (8.4) kg and 179.3 (8.2) cm, respectively	Elite Male 7s	Physical Health		From an immunological viewpoint - when rugby players play two consecutive Sevens matches, the exercise loading is thought to be hard, similar to that experienced during a marathon race and intensive or long training in a training camp	Physical Demand		CV/Met/Imm Demand
Influence of different small-sided games on physical and physiological demands in rugby union players	Vaz et al	2016	Portugal	to describe the influence of four different small-sided games with 15-min duration on physical andphysiological demands in rugby union players	Data were collected using global positional systems technology with heart rate monitoredcontinuously across training sessions	One sevens match	One sevens match	Fourteen rugby union players (22.4_x0002_3.2 years) participated in the study.	Amateur Male 7s	Rugby & Physical Activity/Physiologic Demand		Players spent the majority of time above 90% of the HRmax	Physical Demand		CV/Met/Imm Demand
Differences between experienced and novice Rugby Union players during small-sided games	Vaz et al	2012	Portugal	To compare physical exertion and game performance indicators of experienced and novice Rugby Union players when playing small-sided games.	GPS units and heart rate belt	Eight 6 vs 6 small-sided games over a 4-wk. period, with 12 min. continuous duration in a 60 ×40 m playing area		40 males	Other	Rugby & Physical Activity/Physiologic Demand		The results for heart rate-related indicators showed similarly high energetic demands while playing small-sided games (above 90% HR max) for ex-perienced and novice players alike	Physical Demand		CV/Met/Imm Demand
Positional demands of professional rugby	Lindsay et al	2015	NZ	The aim of this study was to investigate the contemporary demands of each position and whether they can explain changes in psychophysiological stress	Urine and saliva samples were collected before and after five selected Super 15 rugby games from 37 players. Total neopterin (NP), cortisol and immunoglobulin A were analysed by SCX-high performance liquid chromatography and enzyme linked immunosorbent assay. Global positioning system software provided distance data, while live video analysis provided impact data. All contemporary demands were an…				Elite Male Rugby Union	Rugby & Physical Activity/Physiologic Demand		The significant change in salivary cortisol, sIgA and urinary total NP is in accordance with previous studies in rugby union. Time course of changes in immuneoendocrine markers following an international rugby game. It identifies professional rugby as a sport of severe intensity causing changes in several key physiological systems. sIgA has been routinely utilised in several exercise contexts. Ch…	Physical Demand		CV/Met/Imm Demand
A new approach to quantifying physical demand in rugby union	Lacome et al	2014	France	To describe an original approach to assessing individual workload during international rugby union competitions	Sixty-seven files from 30 French international rugby union players were assessed on a computerised player-tracking system during five international games. Each player’s action was split up into exercise and recovery periods according to his individual velocity threshold. Exercise-to-recovery (E:R) period ratios and acceleration were calculated.				Elite Male Rugby Union	Rugby & Physical Activity/Physiologic Demand		About 40% of exercise periods were classified as medium intensity. Exercise intensity: between 24-52% of exercise performed above maximal aerobic velocity (position dependent)	Physical Demand		CV/Met/Imm Demand
Salivary immunoglobulin A response to a collegiate rugby game	Koch et al	2007	USA	We tested the hypothesis that salivary IgA levels will be decreased after a collegiate rugby game	Saliva samples obtained from 16 men's college rugby players before and after an 80-minute regulation rugby game were analyzed for total volume, IgA, total protein content, and osmolality. Salivary IgA was expressed relative to secretion rate (s-IgA), osmolality (IgA-Osm), and total protein (IgA-Pro).				Amateur Male Rugby Union	Physical Health		No significant pregame-postgame changes in salivary IgA were observed (s-IgA: -13%, IgA-Osm: -16%, IgA-Pro: +10%). These data indicate that strenuous physical activity, such as a competitive rugby game, does not affect IgA levels.	Physical Demand		CV/Met/Imm Demand
Exercise intensity during wheelchair rugby competition	Hor et al	2012	France	The purpose of this study is to assess the exercise intensity in competition for subject practicing wheel chair rugby.	Six men (26,1 ± 4,5 years, two quadriplegics, an amputee, a cerebral palsy, two subjects with Charcot-Marie-Tooth disease) performed an assessment of their maximal oxygen consumption (VO2max in ml/kg/min) in laboratory (continuous peak exercise test on cycle ergometer for wheelchair). During exercise testing, the heart rate at ventilatory threshold 2 (HRvt2) and the maximal heart rate (HRmax) wer…				Wheelchair Rugby	Rugby & Physical Activity/Physiologic Demand		The mean heart rate obtained during the game time was 145 ± 28 bpm. The mean percentage of time spent HRvt2 or above and 90% HRmax or above is respectively 53% ± 22% and 34% ± 19% regardless of classification level. Results of this study indicate that wheelchair rugby enables some players to reach an exercise intensity associated with improvements in cardiorespiratory parameters and that the trai…	Physical Demand		CV/Met/Imm Demand
Activity Profiles and Physiological Responses of Representative Tag Football Players in Relation to Playing Position and Physical Fitness	Hogarth et al	2015	Australia	To determine the physical fitness, match-activity profiles and physiological responses of representative tag football players and examined the relationship between physical fitness and the match-activity profile	icrotechnology devices and heart rate (HR)chest straps were used to determine the match-activity profiles of sixteen tag football play-ers for five matches during the 2014 Australian National Championships. The relationshipsbetween lower body muscular power, straight line running speed and Yo-Yo intermittentrecovery test level 2 (Yo-Yo IR2) and the match-activity profile were examined using Pear-…				Male Touch Rugby	Rugby & Physical Activity/Physiologic Demand		Percentage of time spent in various heart rate zones: approx. 75-80% of time >80% Hrpeak	Physical Demand		CV/Met/Imm Demand
Comparison of Activity Profiles and Physiological Demands Between International Rugby Sevens Matches and Training	Higham et al	2016	Australia	To compare the activity profiles and physiological demands between international rugby sevens matches and training	Twenty-two international matches and 63 rugby-specific training drills were monitored in 25 backs and 17 forwards from a national squad of male rugby sevens players over a 21-month period. Drills were classified into 3 categories: lowintensity skill refining (n = 23 drills, 560 observations), moderate- to high-intensity skill refining (n = 28 drills, 600 observations), and game simulation (n = 12…				Elite Male 7s	Rugby & Physical Activity/Physiologic Demand		Mean heart rate of forwards & backs during international matches (% of maximum) 86.9 & 85.0. Cardiovascular load (The cumulative time in 5 heart rate zones was multiplied by a weighting factor (50– 59% HRmax = 1, 60–69% HRmax = 2, 70–79% HRmax = 3, 80–89% HRmax = 4, and $90% HRmax = 5) to linearly scale the intensity of activity. The adjusted values were then summated to indicate the cardiovascul…	Physical Demand		CV/Met/Imm Demand
Running and Metabolic Demands of Elite Rugby Union Assessed Using Traditional, Metabolic Power, and Heart Rate Monitoring Methods	Dubois et al	2017	France	The aims of this study were (1) to analyze elite rugby union game demands using 3 different approaches: traditional, metabolic and heart rate-based methods (2) to explore the relationship between these methods and (3) to explore positional differences between the backs and forwards players	Time motion analysis and game demands of fourteen professional players (24.1 ± 3.4 y), over 5 European challenge cup games, were analyzed. Thresholds of 14.4 km·h-1, 20 W.kg-1 and 85% of maximal heart rate (HRmax) were set for high-intensity efforts across the three methods.				Elite Male Rugby Union	Rugby & Physical Activity/Physiologic Demand		The mean % of HRmax was 80.6 ± 4.3 % while 42.2 ± 16.5% of game time was spent above 85% of HRmax with no significant differences between the forwards and the backs. The HR monitoring methods demonstrate clearly the high physiological demands of professional rugby games	Physical Demand		CV/Met/Imm Demand
Heart rate, blood lactate and kinematic data of elite colts (under-19) rugby union players during competition	Deutsch et al	1998	Australia	It was the aim of the present study to establish the position-specific physiological and kinematic demands of rugby union using accepted and validated procedure	eart rate, blood lactate and time-motion analysis data were collected from 24 players (mean +/- s(x): body mass 88.7 +/- 9.9 kg, height 185 +/- 7 cm, age 18.4 +/- 0.5 years) during six competitive premiership fixtures. Six players were chosen at random from each of four groups: props and locks, back row forwards, inside backs, outside backs. Heart rate records were classified based on percent tim…				Youth Male Rugby Union	Rugby & Physical Activity/Physiologic Demand		The heart rate data indicated that props and locks (58.4%) and back row forwards (56.2%) spent significantly more time in high exertion (85-95% HRmax) than inside backs (40.5%) and outside backs (33.9%) (P < 0.001). Inside backs (36.5%) and outside backs (38.5%) spent significantly more time in moderate exertion (75-84% HRmax) than props and locks (22.6%) and back row forwards (19.8%) (P < 0.05).…	Physical Demand		CV/Met/Imm Demand
Time course of changes in immuneoendocrine markers following an international rugby game	Cunniffe et al	2010	UK	The aim of this study was to evaluate the time course of changes in selected immunoendocrine and inflammatory markers following an international rugby union game	Blood samples were taken from players (n = 10) on camp entry, the morning of the game (pre), immediately after (post) and 14 and 38 h into a passive recovery period				Elite Male Rugby Union	Rugby & Physical Activity/Physiologic Demand		A game of international rugby elicits disturbances in host immunity, which last up 38 h into the recovery period	Physical Demand		CV/Met/Imm Demand
Exercise intensity during wheelchair rugby training	Barfield et al	2010	USA	The purpose of this study was to determine the ability of individuals with a cervical spinal cord injury to achieve and sustain acardiorespiratory training intensity during wheelchair rugby.	Nine wheelchair rugby players completed a continuous peakexercise test on a SciFit Pro I arm ergometer with stage increases each minute to determine peak heart rate and poweroutput. Approximately one week after peak exercise testing, heart rate was recorded (every 5 s) during three regularlyscheduled rugby training sessions. Data were analysed to determine the number of continuous minutes that pa…				Wheelchair Rugby	Rugby & Physical Activity/Physiologic Demand		The percent of time spent at or above 70% heartrate reserve varied across participants and conditions. Continuous pushing was the least variable training condition amongparticipants with the sample averaging greater than 73% of time above the target heart rate. Scrimmage training was highlyvariable across participants with a range of 0% to 98% of time above the criterion. Results of this study in…	Physical Health and Function		CV/Met/Imm Demand
Physical Demands of Women's Rugby Sevens Matches: Female Athletes in Motion (FAiM) Study	Vescovi et al	2015	Canada	To examine the locomotor, metabolic power and heart rate demands for several standards of women’s sevens matches	4 Canadian teams were monitored during the USA Rugby Sevens event using global positioning sys-tem technology with players classified as Inter-national (n = 16) or Developmental (n = 13).	Rugby Sevens Tournament	Multiple Rugby 7s matches (7-mins long) - data standardised for per match	Female rugby sevens players from the Canadian National Team (n = 22) and a university squad (n = 25) - only 29 used in data analysis (had to play certain amount of matches)	Other	Rugby & Physical Activity/Physiologic Demand		Females 7s rugby participants spend a considerable amount of time in LMVPA but also high-intensity PA. International demands: Total distance: 1468±88 Total low-moderate intensity distance (approx.): 1116m Total high-intensity distance: 224m Time >80% max heart rate (approx.): 13mins Developmental demands: Total distance: 1252±135 Total low-moderate intensity distance (approx.): 1064n Total high-i…	Physical Demand		Multiple sub-themes
Running demands and heart rate responses in men Rugby Sevens	Suarez-Arrones et al	2012	Spain	To examine match running performance and exercise intensity in a Rugby Sevens (7s) team during competitive club-level matches	Time-motion analyses (global position system)	5 competitive matches in a 2-day tournament	5 competitive matches in a 2-day tournament	7 male rugby players	Elite Male 7s	Rugby & Physical Activity/Physiologic Demand		The players covered an average distance of 1,580.8 6 146.3 m per game (14 minutes). Over this distance, 34.8% (549.7 6 79.1 m) was spent standing and walking, 26.2% (414.8 6 105.1 m) jogging, 9.8% (154.6 6 53.5 m) cruising, 15.5% (244.5 6 80.1 m) striding, 5% (79.5 6 37.2 m) highintensity running, and 8.7% (137.7 6 84.9 m) sprinting. For over 75% of the game, the players were exposed to heart rat…	Physical Demand		Multiple sub-themes
Match-play activity profile in elite women's rugby union players	Suarez-Arrones et al	2014	Spain	To provide an objective description of the locomotive activities and exercise intensity undergone during the course of an international-level match of female rugby union	Analyzed using global positioning system tracking technology	One international level match	One match of rugby	Eight players	Elite Female Rugby Union	Rugby & Physical Activity/Physiologic Demand		The total distance covered by the players during the whole match was 5,820 /- 512 m. Over this distance, 42.7% (2,487 /- 391 m) was spent standing or walking, 35% jogging (2,037 /- 315 m), 9.7% running at low intensity (566 /- 115 m), 9.5% at medium intensity (553 /- 190 m), 1.8% at high intensity (105 /- 74 m), and 1.2% sprinting (73 /- 107 m). The players spent 46.9 /- 28.9% of match time betwe…	Physical Demand		Multiple sub-themes
Match running performance and exercise intensity in elite female Rugby Sevens	Suarez-Arrones et al	2012	Spain	To describe the match-play demands of professional female rugby players competing in Rugby Sevens (Rugby 7's) matches	Time-motion analyses (global position system)	5 competitive matches in a 2-day international tournament	5 competitive matches in a 2-day international tournament - one match 14 minutes	12 players	Elite Female 7s	Rugby & Physical Activity/Physiologic Demand		Players covered an average distance of 1,556.2 ± 189.3 m per game (14 minutes). 29.7% (462.6 ± 94.6 m) was spent standing and walking, 33.2% (515.9 ± 88.6 m) jogging, 11.6% (181.0 ± 61.4 m) cruising, 16.4% (255.7 ± 88.3 m) striding, 3.7% (57.1 ± 40.8 m) high-intensity running, and 5.4% (84.0 ± 64.8 m) sprinting. For over 75% of the game, the players were exposed to heart rates (HRs) >80% of their…	Physical Demand		Multiple sub-themes
Activity profiles of elite wheelchair rugby players during competition	Rhodes et al	2015	UK	To quantify the activity profiles of elite wheelchair rugby (WCR) players	Seventy-five elite WCR players from 11 national teams were monitored using a radio-frequency-based, indoor tracking system across 2 international tournaments. Players who participated in complete quarters (n = 75) and full matches (n = 25) were included	2 tournaments	NA	75 elite WR athletes	Wheelchair Rugby	Rugby & Physical Activity/Physiologic Demand		Demands: match distances of up to ~4,600 m, combined with the anaerobic demands required for ~38 high-intensity bouts per match	Physical Demand		Multiple sub-themes
Match-Play Running Performance and Exercise Intensity in Elite International Women's Rugby Sevens	Malone et al	2018	Ireland	The aim of the current investigation was to describe the running and physiological performance demands of elite women’s rugby sevens match-play	Twenty-seven (n = 27) rugby seven’s players (24.4 6 2.1 years; 168 6 7.1 cm; 67.9 6 4.3 kg) were recruited for the current investigation. Across the observational period, 36 games were analyzed; during these games, players wore global positioning system technology (10-Hz, Statsports Viper Pod; STATSports, Newry, Northern Ireland, United Kingdom) and heart rate monitors (Polar Team System, Polar E…				Elite Female 7s	Rugby & Physical Activity/Physiologic Demand		The mean distance covered during match-play was 1,625 ± 132 m which equates to a relative running performance of 116.8 6 9.4 m/min. Across the duration of match-play, players spent over 75% of the time above 80% of heart rate maximum (HRmax)	Physical Demand		Multiple sub-themes
An evaluation of the physiological demands of elite rugby union using global positioning system tracking software	Cunniffe et al	2009	UK	To evaluate the physiological demands of elite rugby union using GPS tracking software	Players (n = 2) were tracked continuously during a competitive team selection game using Global Positioning System (GPS) software				Elite Male Rugby Union	Rugby & Physical Activity/Physiologic Demand		Data revealed that players covered on average 6,953 m during play (83 minutes). Of this distance, 37% (2,800 m) was spent standing and walking, 27% (1,900 m) jogging, 10% (700 m) cruising, 14% (990 m) striding, 5% (320 m) high-intensity running, and 6% (420 m) sprinting. Players exercised at ;80 to 85% V_ O2max during the course of the game with a mean heart rate of 172 b_x0001_min21 (;88% HRmax)…	Physical Demand		Multiple sub-themes
The Effect of Contextual Factors on Physiological and Activity Profiles in International Women's Rugby Sevens	Goodale et al	2017	Canada	To evaluate the effects of contextual game factors on activity and physiological profiles of international-level women’s rugby sevens players.	Twenty international-level female rugby sevens players from the same national team participated in this study. Global positioning system and heart-rate data were collected at 5 World Rugby Women’s Sevens Series events (2013–14 season).				Elite Female 7s	Rugby & Physical Activity/Physiologic Demand		Mean HR: 88% of HRmax Total distance: 1352±306m	Physical Demand		Multiple sub-themes
Effect of “Touch Rugby” Training on the Cardiovascular Autonomic Control In Sedentary Subjects	Filliau et al	2015	France	investigate the cardiovascular benefits of touch rugby by assessing the cardiovascular autonomic controls of participants	Baseline survey internally. Before (pre-test) and after (post-test) the period of training, cardio-respiratory recordings were achieved at rest and during a graded maximal exercise on a treadmill.	12-weeks of one 90-min touch rugby session/week		20 adults (30–64 years old) - sedentary - 10 M&F	Mixed Touch Rugby	Physical Health		Once-weekly 90-min sessions over 3-months modified the cardiovascular autonomic control of healthy sedentary subjects. Resting heart rate and systolic blood pressure decreased. High-frequency RR variability and the high-frequency baroreflex sensitivity increased, whereas the low-frequency/high-frequency ratio decreased. Therefore, such training appears to be beneficial in terms of cardiac health	Physical Health and Function		Cardiovascular Health and Function
Effects of 8 Weeks' Training on Systemic and Muscle Oxygen Dynamics in University Rugby Players	Takagi et al	2017	Japan	To investigate the effects of 8 weeks of training on O2 dynamics in university rugby players	University rugby players (n = 15) participated in 5 strength training sessions and 4 field-based training sessions per week for 8 weeks. Before and after 8-weeks’ training, the subjects performed ramp cycling exercise until exhaustion. Muscle O2 saturation (SmO2), relative changes from rest in deoxygenated hemoglobin concentration (∆Deoxy-Hb) and total hemoglobin concentration, cardiac output (CO…	8 weeks	5 strength training sessions and 4 field-based training sessions per week for 8 weeks	15 male rugby players	Amateur Male Rugby Union	Physical Health		Though peak VO2 tended to be increased after training, there were no significant changes in CO, nor any muscle O2 dynamic variables at peak exercise between before and after training. However, an increase in peak VO2 was significantly correlated with diminishment of deoxy-Hb and an increase in SmO2. Changes in CO caused by training were not related to improved peak VO2. The improvement of peak VO…	Physical Health and Function		Cardiovascular Health and Function
Adaptations in the arterial function of female rugby athletes- a cross-sectional study	Pereira et al	2018	Portugal	The purpose of this study was to understand the effect of intensive training in the arterial mechanics of competitive rugby female players.	Fifteen female rugby athletes and fi fteen non-athletes, matched for age (mean age: 19.87 ± 2.50 years) participated voluntarily in a cross-sectional study. Carotid-femoral (cf) and carotid-radial (cr) pulse wave velocity (PWV) were measured with the Complior Analyse device in baseline conditions. With an adapted fl ow-mediated dilation paradigm, cr-PWV was measured again after a fi ve minutes fo…				Amateur Female Rugby Union	Physical Health		Rugby, a sport characterized by a moderate amount of isometric and isotonic features, is associated with a benefi cial arterial profi le in female athletes, mainly through a better endothelial function, better arterial compliance and lesser effect of the reflected waves, when compared to age-matched non-athlete girls.	Physical Health and Function		Cardiovascular Health and Function
Longitudinal Observation Of Cardiac Adaptation In Junior Rugby Players Using Echocardiography	Oguri et al	2018	Japan	The purpose of this study is to conduct a 3-year longitudinal study of cardiac adaptation in junior and senior high school athletes who play rugby with echocardiography in an effort to examine how continuous practice of rugby during the growth period affects ventricular volume expansion and ventricular septum thickening.	We measured height, body weight, blood pressure and took electrocardiogram and echocardiography measurements once a year for 3 consecutive years in these subjects. Echocardiography measurements were taken by portable ultrasonic measurement apparatus on B mode to measure left ventricular end-diastolic dimension (LVDd) and posterior left ventricle wall thickness (PWT). As a substitute for the contr…	NA	NA	Subjects were 34 male junior high and 79 senior high school rugby players with top-level game power. Subjects engaged in rugby-related training approximately 3 hours a day, 6 days a week continuously for 3 years.	Youth Male Rugby Union	Physical Health		Continuous practice of rugby in junior and senior high school was associated with marked expansion of left ventricular volume and thickening of the left ventricular septum	Physical Health and Function		Cardiovascular Health and Function
Impact of Adapted Sports Activities on the Progression of Carotid Atherosclerosis in Subjects With Spinal Cord Injury	Matos-Souza et al	2016	Brazil	To determine whether regular performance of adapted sports is associated with long-term changes in carotid atherosclerosis in subjects with spinal cord injury(SCI).	Participants: Men with chronic (>1y) SCI and no preserved motor function below the injury level were evaluated in 2007 and 2012 (N=17). Nine subjects did not perform physical activity between the studied time points (control group), whereas 8 subjects entered competitive upper-body sports programs (rugby: n=5, basketball: n=1, jiu-jitsu: n=1, and tennis: n=1) after baseline and were regularly tra…				Wheelchair Rugby	Physical Health		This follow-up study provides the first longitudinal evidence that regular upper-body sports activities are associated with long-term reductions in carotid atherosclerosis in subjects with SCI. These data suggest that the performance of adapted sports might be a potential prevention strategy aimed at reducing cardiovascular risk in individuals with SCI.	Physical Health and Function		Cardiovascular Health and Function
Nutrient intake, serum lipids and iron status of colligiate rugby players	Imamura et al	2013	Japan	The purpose of this study was: 1) to collect baseline data on nutrient intake in order to advise the athletes about nutrition practices that might enhance performance, and 2) to compare serum lipids, lipoproteins, apolipoproteins (apo), lecithin:cholesterol acyltransferase (LCAT) activity, and iron status of forwards and backs.	The sporting group was divided into 18 forwards and 16 backs and were compared with 26 sedentary controls. Dietary information was obtained with a food frequency questionnaire. Blood analysis for makers was performed.				Amateur Male Rugby Union	Physical Health		The forwards showed more atherogenic lipid profile than the backs, whereas the backs showed not only anti-atherogenic lipid profile, but also showed more atherogenic lipid profile relative to the control group. The causes of atherogenic and anti-atherogenic lipid profiles in rugby players could be multifactorial. None of the rugby players had anemia and iron depletion.	Physical Health and Function		Cardiovascular Health and Function
Effect of training on the serum lipid profile in able-bodied and spinal cord injured rugby players	Hubner-Wozniak et al	2010	Poland	The aim of the present study was to examine the effect of rugby training on the serum lipid profile in able-bodied and wheelchair players	The following groups took part in the study: sedentary able-bodied men (Group M, n=10), inactive disabled men using wheelchairs (Group MW, n=10), semiprofessional rugby players (Group R, n=10), and wheelchair rugby players (Group RW, n=10). The serum triacyloglycerols (TG), the total cholesterol (TC), the LDL cholesterol (LDLchol) and the HDL cholesterol (HDLchol) concentrations were assayed.				Other	Physical Health		The total cholesterol and the LDL cholesterol concentrations were higher in able-bodied sedentary men compared to non-disable rugby players. There was also a tendency to higher HDL cholesterol concentration in rugby players compared to sedentary men (Group R vs. M). Rugby training resulted in a significant decrease of the LDL cholesterol and an increase in the HDL cholesterol concentration, as we…	Physical Health and Function		Cardiovascular Health and Function
Lower serum leptin concentrations in rugby players in comparison with healthy non-sporting subjects--relationships to anthropometric and biochemical parameters	Haluzik et al	1998	Czech Republic	To determine whether regular physical training in rugby players would be able to de-crease their serum leptin concentrations in comparison with healthy non-sporting subjects without significant differences in body fat content	We have compared the body weight, the body mass index (BMI), the body fat content (measured by caliper as skinfold thickness) and the serum concentrations of leptin, triglycerides, total, high density and low density lipoprotein (LDL) cholesterol in 14 top rugby players and 10 healthy controls.			There were 14 top rugby-players with mean age 23.5 years and 10 healthy controls with mean age 28.6 years included in the study	Elite Male Rugby Union	Physical Health		The serum leptin concen-trations in both groups positively correlated withthe BMI and body fat content and also with LDLconcentrations in the control group. The serum leptinconcentrations in the rugby players were lower than inthe non-sporting subjects despite a similar body fatcontent in both groups. We would therefore suggest thepossibility that regular hard physical training decreasesserum lep…	Physical Health and Function		Cardiovascular Health and Function
Higher antioxidant defences in plasma and low density lipoproteins from rugby players	Evelson et al	2002	Argentina	The aim of the present study was to evaluate the lipid profile and the antioxidant status in a group of well-trained rugby players in comparison with sedentary controls	Lipid and antioxidant profiles were evaluated in 15 well-trained rugby players and 15 sedentary controls. Lipoprotein fractions were separated by sequential ultracentrifugation and α-tocopherol content was determined in each fraction by highperformance liquid chromatography. Susceptibility to in vitro oxidation was also measured in intermediate and low density lipoproteins isolated from both grou…				Amateur Male Rugby Union	Physical Health		Given that intermediate density and low density lipoproteins represent the most atherogenic fraction, this finding, in combination with the improved lipid and antioxidant status, would add to the link between regular physical activity and protection against cardiovascular disease.	Physical Health and Function		Cardiovascular Health and Function
Spirometric and ergospirometric evaluation of wheelchair rugby players	Domaszewska et al	2013	Poland	Spirometric and ergospirometric evaluation of wheelchair rugby players	14 members of the Polish National Wheelchair Rugby Team were recruited for the study. The male players aged 20-40 years with cervical spinal cord injuries underwent spirometric and ergospirometric tests				Wheelchair Rugby	Physical Health		The physiological parameters obtained during the exercise test indicate a higher aerobic capacity of surveyed athletes in comparison with untrained quadriplegics	Physical Health and Function		Cardiovascular Health and Function
Competitive and systematic rugby training increases left ventricular mass and wall thickness within normal ranges and augments risk of left ventricular hypertrophy	Diaz Babio et al	2017	Argentina	To study the the heart of male international-elite rugby players (RP) and untrained, control patients (CP) to test whether competitive and systematic rugby training (CSRT) develops LVH	Between 2015 and 2016, a total of 613 healthy male patients ranging from 14 to 49 y/o, with (RP, n=313) or without (CP, n=300) history of CSRT were prospectively included to be assessed clinically and with 2-D transthoracic echocardiography (TTE). Two independent and experienced physicians measured left atrial volume (LAV) and LV parameters: total mass (LVM), end-diastolic (LVDd) and end-systolic…				Amateur Male Rugby Union	Physical Health		CSRT was associated with increased LV wall thickness and incremented LV mass within normal ranges. Although RP showed higher risk of LVH outcome, no evidence of hypertrophic cardiomyopathy was found in our population.	Physical Health and Function		Cardiovascular Health and Function
Effect of training on physical capacity and physical strain in persons with tetraplegia	Dallmeijer et al	1997	The Netherlands	Therefore, the purpose of the present study was to evaluate the effect of quad rugby training on the physical capacity & strain during standardized ADL in persons with tetraplegia. A trained and untrained (recently started) quad rugby team, as well as a control group of inactive persons with tetraplegia, was therefore followed during a period of 6 months.	The effects of quad rugby training on physical capacity and physical strain during standardized activities of daily living were investigated in 9 trained (A) and 5 untrained quad rugby players (B), and 7 inactive persons with tetraplegia (C) at 0 , 3 and 6 months after the start of a quad rugby training program (l.Sh.w k'1). Physical capacity was measured as maximal isometric strength, peak power…				Wheelchair Rugby	Physical Health		No measurable training effects could be observed for POpeak, VO2peak and physical strain. A significant rise in maximal isometric strength was found in group B after 3 and 6 months of training, whereas no significant changes were found in groups A and C. The results suggest that a higher training frequency and/or intensity may be needed to gain significant training effects for POpeak and VO2peak	Physical Health and Function		Cardiovascular Health and Function
Higher LDL oxidation at rest and after a rugby game in weekend warriors	Chang et al	2002	Taiwan	The present study investigates LDL oxidation and activities of antioxidant enzymes in WW (n = 6) at rest and after a rugby game. The results are compared with those of sedentary controls (CON, n = 10) and trained rugby players (TR, n = 15).	LDL + VLDL conjugated dienes (CD) and thiobarbituric acid reactive substances (TBARS) as well as erythrocyte superoxide dismutase (SOD) and glutathione peroxidase (GPx) activities were analyzed in WW and TR groups before and after a rugby game				Amateur Male Rugby Union	Physical Health		To sum up, in this study, we showed that the WW group had higher LDL oxidation levels than the TR and CON groups at rest and after a rugby game. In addition, the degree of exercise-induced LDL oxidation was higher in the WW than in the TR group.	Physical Health and Function		Cardiovascular Health and Function
Cardiometabolic Risk Reduction Through Recreational Group Sport Interventions in Adults: A Systematic Review and Meta-analysis	Bellissimo et al	2018	USA	To estimate the pooled effects of community-based, recreational-level group sports on cardiometabolic risk factors and fitness parameters among adults.	Systematic Review & Meta-Analysis	NA	NA	23 publications were included (902 participants; mean ± SD age, 46.6±11.7 years), comprising 21 soccer and 2 rugby interventions	Other	Physical Health		We found significant cardiometabolic and fitness improvements following group sport participation, primarily recreational soccer. These findings suggest that group sport interventions are promising strategies for reducing cardiometabolic risk in adults.	Physical Health and Function		Cardiovascular Health and Function
The aging effect on the ratio of total cholesterol to high density lipoprotein between national rugby players and untrained males...7th World Congress on Aging and Physical Activity	Huang et al	2008	Taiwan	Our interest was to detect and compare ratios of TC:HDL-C between national rugby players and untrained persons of various ages	Forty-five national rugby players and 97 male sedentary persons were our subjects; they were divided into four different age groups: 21-30 yrs, 31-40 yrs, 41-50 yrs, and over 51 yrs. Cholesterol was tested by the CHOD-PAP method, and HDL-C was quantified by the phosphotungstic acid- MgCl sub(2) precipitation method. ANOVA, least significant difference (L.S.D.), and t test were used to check the d…				Elite Male Rugby Union	Physical Health		Despite living conditions, the ratio of TC: HDL-C of 4.086 in the sample of national rugby players over 51 yrs of age is very different (p < .01) from the other age groups of players and the untrained group of the same age (3.717). In the groups of 21-30 yrs to 41-50 yrs, values for rugby players were less than those of untrained groups. Thus, it is different inversely in the over-51-yrs group (p…	Physical Health and Function		Cardiovascular Health and Function
Cross-sectional and longitudinal observation of cardiac adaptation in student athletes	Zhao et al	2002	Japan	The purpose of this study was to ascertain whether exercise training cardiac adaptation exists in student rugby athletes, to define an adaptive pattern and to observe the student rugby athletics cardiac adaptive process.	Subjects consisted of 42 male senior high school student rugby athletes, who participated in sports in junior high school, and a control group of sedentary students from the same senior high school who were matched for age. Student athletes were measured once a year over a three-year period. Left ventricular internal dimension at the end-diastole (LVIDd) and left ventricular posterior wall thickn…				Youth Male Rugby Union	Physical Health		The results of this present study suggest that regular rugby exercise training during senior high school obviously induced left ventricular posterior wall thickening in the athletic students. An enlarged left ventricular cavity was observed at the first grade level of senior high school and did not significantly change during three years of senior high school	Physical Health and Function		Cardiovascular Health and Function
Lipids and theirs carriers in sportsmen: the lipoprotein particles	Maso et al	2002	France	This study presents an original approach tothe effect of regular sporting activity on the metabolism of lipids	We have examined the physiological variationsof lipoparticles (Lp) AI, Lp B:CIII, Lp B:E, Lp (a) andthe principal lipid markers in 21 high-level rugby playersand men of the same age group who take part in nosporting activity (reference group;n=35).				Elite Male Rugby Union	Physical Health		The analysis showed a paradoxical decrease in the high-density lipo-protein fraction of cholesterol (P<0.05) and in apo-lipoprotein AI (P<0.0001), and an increase in theapoprotein B/apoprotein AI ratio in the sportsmen,compared with the reference group. According to theseresults, physical activity seems to have only a slight in-fluence on anti-atherogenic serum markers. However,the drop in Lp B:E…	Physical Health and Function		Cardiovascular Health and Function
A quantitative and qualitative evaluation of a 10 week play touch rugby league programme for improving physical activity in adult men and women.	Ashton	2015	UK	The aim of the study was to examine the health benefits and quantify the match demands of a Touch Rugby League program in adult men and women.	Using a non-randomised, mixed model design, 16 participants (male n= 8, female n = 8) completeda 10-week Touch Rugby League program organised by the Rugby Football League. Participants had health markers including resting heart rate, resting blood pressure, cholesterol and anthropometric measure, taken at baseline, week 5 and week 10. GPS data was collected over the 10-week intervention and was u…				Other	Physical Health		Match demands were consistently higher in males than females over the 10-week intervention. Resting heart rate, when compared to baseline, was likely lower and possibly lower at week 10 in males and females respectively. At week 10 diastolic blood pressure was likely lower and very likely lower in men and women respectively when compared to baseline values. High-density lipoprotein cholesterol re…	Physical Health and Function		Cardiovascular Health and Function
Whole-body bone mineral density and bone mineral mass in young adult rugby union players	Bell et al	2000	UK	To identify differences in the whole-body and regional BMD and bone mineral mass in contrasting playing requirements of rugby union football	30 young rugby players assigned to backs/forwards & 21 controls. BMM measured using DXA. All BMD values reported as areal densities.				Amateur Male Rugby Union	Physical Health		There were substantial differences in BMD and BMMc between forwards and backs. Contrasts between forwards and controls were more striking than between backs and controls	Physical Health and Function		Metabolic Health and Function
Long-term rugby practice enhances bone mass and metabolism in relation with physical fitness and playing position	Elloumi et al	2009	Tunisia	We attempted to clarify whether rugby was able to enhance bone mineral density (BMD) and content (BMC) of weight-bearing bones by modifying bone remodelling in relation to physical fitness in male rugby players compared to controls	22 male international rugby players aged 20–31 years (forwards, n = 12 and backs, n = 10) were compared to 14 age-matched controls of the same ethnic origin aged 21–33 years. BMD and BMC were measured by DEXA and bone metabolism was evaluated by specific makers. Physical fitness level was analysed in parallel.				Elite Male Rugby Union	Physical Health		In conclusion, long-term rugby participation is associ-ated with improvement of physical fitness, increased bone mass, Osteocalcin and Type I collagen levels, and enhanced axial andappendicular BMD and BMC in adult athletes. The mus-culo-skeletal adaptations, greater in forwards than in backs,could mimic training responses and therefore explain thebone features, localised in specific stressed reg…	Physical Health and Function		Metabolic Health and Function
Rugby practice and skeleton: correlations between strength, bone mineral density, and biochemical markers of bone remodeling	Elloumi et al	2006	Tunisia	To investigate the relationships among muscular strength, bone mineral density (BMD) and biochemical markers of bone remodeling in healthy active male rugby players.	BMD was measured by dual-energy X-ray absorptiometry. Bone formation was assessed by measurements of circulating osteocalcin (OC). Bone resorption was assessed by urinary levels of cross-linked C-telopeptides of type I collagen (CTX). Twenty rugby players of the Tunisian team gave their consent to participate in the study following an explanation of experimental procedures and purpose. This was d…				Elite Male Rugby Union	Physical Health		According to our results, rugby practice stimulates bone tissue and generate an increase of BMD. Positive significant correlations (P < 0.05 to P < 0.0001) were shown between strength and total and regional (spine, pelvis, and legs which are specifically stressed by this sport participating) BMD. In the same way, the OC, but not CTX, is highly correlated with the same regional and total BMD. The …	Physical Health and Function		Metabolic Health and Function
Bone mineral content and density of Tunisian male rugby players: differences between forwards and backs	Elloumi et al	2006	Tunisia	The purpose of this study was to examine the effects of long-term rugby participation on bone mineral content (BMC) and density (BMD) of male rugby players and to determine if the diverse stimuli elicited by the actions of forwards and backs affect their skeleton differently.	Dual energy X-ray absorptiometry (DXA) scans were obtained from 20 male rugby players (10 Forwards and 10 Backs) who actively participated in rugby for the past 13 yr, and from 29 age matched non active subjects of the same ethnic origin				Elite Male Rugby Union	Physical Health		Rugby players showed greater total body mass, and greater total lean and fat body masses than control subjects (p < 0.01). Whole spine BMC and BMD were 52 % and 15 % higher, respectively, in the rugby players than in the control subjects (p < 0.001). Furthermore, rugby players displayed higher skeletal BMC (40 %, 37 % and 58 % for legs, arms and pelvis, respectively) and BMD (16 %, 21 % and 17 %,…	Physical Health and Function		Metabolic Health and Function
Bone mineral density among female sports participants	Egan et al	2006	UK	The aims of thepresent study were to compare BMD and body composition measures among female participants in three distinctly different sports and investigatedifferences from sedentary control subjects.	Participants were club and university level Rugby Union football players (n= 30, age: 21.4 ± 1.9 years, height: 1.67 ± 0.05 m, mass:73.3 ± 10.7 kg), netball players (n= 20, 20.7 ± 1.3 years, 1.68 ± 0.07 m, 64.3 ± 7.2 kg), distance runners (n= 11, 21.5 ± 2.6 years, 1.68 ± 0.04 m,57.1 ± 6.1 kg), and sedentary controls (n= 25, 21.4 ± 1.1 years; 1.64 ± 0.07 m, 56.8 ± 6.8 kg). With the exception of th…				Amateur Female Rugby Union	Physical Health		All sports groups had higher BMD values than had the controls. Density of bone in the upper body was most pronounced in the rugby football players and least pronounced inthe runners. Positive effects were evident at all sites for the rugby players	Physical Health and Function		Metabolic Health and Function
An observational study on the impact of physical activity type on bone mineral density, hip bone geometry and TBS in a group of adult men	Zakhem et al	2015	Lebanon	To compare bone mineral density, hip bone geometry and trabecular bone score (TBS) in three groups of young males (athletic and sedentary)	Lean mass, fat mass, whole body (WB) bone mineral density (BMD) and bone mineral content (BMC), lumbar spine (L1-L4) trabecular bone score (TBS) and BMD, total hip (TH) and femoral neck (FN) BMD, and geometric indices of the femoral neck (cross-sectional area (CSA), cross-sectional moment of inertia (CSMI), section modulus (Z) and buckling ratio (BR)) were measured by dual-energy X-ray absorptiom…	NA	NA	32 healthy young men (9 rugby players, 12 football and basketball players, and 11 sedentary men), with a mean age of 21 years	Amateur Male Rugby Union	Physical Health		In this study, BMD, L1-L4 TBS and FN geometric indices values (CSA, CSMI and Z) were greater in both groups of athletic young men (rugby and football/basketball players) than in the sedentary group. Moreover, there were significant differences (P < 0.05) between rugby players and football/basketball players regarding BMD and FN geometric indices (CSA and Z)	Physical Health and Function		Metabolic Health and Function
Bone mineral density and body composition among athletes: Lightweight versus heavyweight sports	Van Santen et al	2017	UK	The aim of this study is to evaluate the differences in BMD and body composition among athletes engaged in weight restricted and non-weight restricted sports	BMD and body composition was assessed by Dual-energy X-ray absorptiometry (DXA), utilising either the GE Lunar iDXA or the GE Lunar Prodigy.	NA	NA	Eighty-two males (45. 1% lightweight) and ninety-five females (53. 7% lightweight), median (IQR) age: 22.9 (20. 7-26. 8) years, were analysed.	Other	Physical Health		BMD was significantly higher in lumbar spine (1. 326 +/- 0.158) and body without head (1. 267 +/- 0.111) compared with lightweights (weight limit in sport)(1. 248 +/- 0.147) and 1.164 +/- 0.093, respectively) at p < 0.05. Significant differences were also found between female heavyweight (no weight limit) and lightweight participants at the same measured sites (p < 0.05).	Physical Health and Function		Metabolic Health and Function
Do sporting activities convey benefits to bone mass throughout the skeleton?	Nevill et al	2004	UK	The aim of the present study was to compare the BMD (recorded at nine sites throughout the skeleton) of 106 male athletes (from nine sports) with that of 15 male non-exercising age-matched controls	Multivariate and univariate analyses of covariance were performed to compare the BMD of the nine sports groups with controls (at all sites) using body mass and age as covariates			106 male athletes (from nine sports)	Other	Physical Health		The rugby players' adjusted BMD was the greatest of all sports groups and greater than controls at all nine sites (all P <0.01), with differences ranging from 8% greater in the left arm to 21% in the lumbar spine. These results suggest that sporting activities involving high impact, physical contact and/or rotational forces or strains are likely to convey significant benefits not only to the load…	Physical Health and Function		Metabolic Health and Function
Rugby-specific small-sided games training is an effective alternative to stationary cycling at reducing clinical risk factors associated with the development of type 2 diabetes: a randomized, controlled trial	Mendham et al	2015	Australia	The present study investigated whether rugby small-sided games (SSG) could be an effective alternative to continuous stationary cycling (CYC) training at reducing clinical risk factors associated with the development of type 2 diabetes mellitus (T2DM).	Thirty-three middle-aged (48.6+/-6.6y), inactive men were randomized into a CYC (n=11), SSG (n=11), or control (CON, n=11) group. Participants trained 3d.wk(-1) for 8 weeks, while control participants maintained normal activity and dietary patterns. Exercise duration was matched between groups, which involved CYC or SSG (four quarters, interspersed with 2-min passive recovery). Both training prog…				Male Touch Rugby	Physical Health		Both CYC and SSG increased VO2 at 80%HRmax, and reduced glycated haemoglobin, glucose area under the curve (AUC; SSG, -2.3+/-2.4; CYC -2.2+/-1.6 mmol.L(1)(120 min)(1); p<0.05), and total body fat-mass (SSG -2.6+/-0.9%; CYC -2.9+/-1.1%), compared to no change in CON (p<0.05). SSG reduced insulin AUC (-30.4+/-40.7 micro lU.mL(1)(120 min)(1); p<0.05) and increased total body fat-free mass (1.1+/-1.2…	Physical Health and Function		Metabolic Health and Function
The acute effects of aerobic exercise and modified rugby on inflammation and glucose homeostasis within Indigenous Australians	Mendham et al	2012	Australia	This study investigated the acute effects of twoexercise modes, including cycle ergometry and modifiedrugby on inflammation and glucose regulation within anIndigenous Australian population	Ten sedentary, untrainedIndigenous male participants volunteered to participate andwere not clinically diagnosed with cardiovascular or met-abolic disorders. Following baseline testing and in a ran-domized cross-over design participants completed twoexercise protocols (cycle ergometry and modified rugby) of40-min duration separated by 7 days’ recovery. Fastingvenous blood was collected pre, post,…				Male Touch Rugby	Physical Health		This study identified similaracute inflammatory and glucose regulatory responsesbetween cycle ergometry and modified rugby. Prescribingmodified rugby as a mode of physical activity may provideIndigenous populations with a community-based approachto promote increased engagement in physical activity andassist in the acute regulation of glucose disposal andinflammatory cytokines	Physical Health and Function		Metabolic Health and Function
Effect of rugby training on blood antioxidant defenses in able-bodied and spinal cord injured players	Hubner-Wozniak et al	2011	Poland	To examine the effect of rugby training on the blood antioxidant capacity in able-bodied and wheelchair rugby players with tetraplegia	Four groups of subjects participated in the study: sedentary able-bodied males (group SA, n=19), sedentary males with tetraplegia (group ST, n=10), able-bodied rugby players (group RA, n=22) and wheelchair rugby players with tetraplegia (group RT, n=14). The activities of superoxide dismutase (SOD), glutathione reductase (GR) and catalase (CAT) were determined in erythrocyte hemolysates, whereas …				Other	Physical Health		Adaptive response to training was similar in both able-bodied and wheelchair rugby players, and it was characterized by increased erythrocyte CAT and GPX activities in resting conditions improving resistance to oxidative stress	Physical Health and Function		Metabolic Health and Function
Impact of Wheelchair Rugby on Body Composition of Subjects With Tetraplegia: A Pilot Study	Gorla et al	2016	Brazil	To investigate the longitudinal effects of wheelchair rugby (WR) training on body composition of subjects with tetraplegia.	Individuals with tetraplegia (N=13; age, 26.6±6.0y) were evaluated at baseline and after WR training. Four sessions per week of WR training composed by aerobic and anaerobic activities and technical and tactical aspects of WR. The average time of intervention was 8.1±2.5 months. Body composition assessed by dual-energy x-ray absorptiometry.				Wheelchair Rugby	Physical Health		Regular WR training increased lean mass and bone mineral content in the arms and decreased total body fat mass. Conversely, WR training was associated with decreased bone mineral content in the trunk. These results suggest that regular WR training improves body composition in subjects with tetraplegia.	Physical Health and Function		Metabolic Health and Function
Positive, site-specific associations between bone mineral status, fitness, and time spent at high-impact activities in 16- to 18-year-old boys	Ginty et al	2005	UK	The aim of this cross-sectional study was to evaluate the relationships between whole body andregional bone mineral status and self-reported participation time in no-, low-, moderate-, and high-impact activities and fitness measurementsin 16- to 18-year-old boys.	One hundred twenty-eight boys underwent absorptiometry (DXA) measurements (Hologic QDR 1000W) of bonemineral content (BMC), bone area (BA), and bone mineral density (BMD) at the whole body, hip, spine, and forearm. They also completedthe EPIC (European Prospective Investigation of Cancer) physical activity questionnaire, which allowed categorization of activities accordingto impact and aerobic in…				Youth Male Rugby Union	Physical Health		Boys in the highest third ofhigh-impact activity had significantly greater size-adjusted whole body BMC and total hip BMC compared to subjects in the lowest third[+3.4 (1.2)% for whole body and +8.5 (2.2)% for hip, bothP= 0.001]. Boys in the highest third of high-impact activity spent most activitytime jogging, playing tennis, football and rugby, basketball, and exercising with weights. These fin…	Physical Health and Function		Metabolic Health and Function
Bone mineral density in retired rugby players: initial findings from the UK Rugby Health project	Entwistle et al	2018	UK	To investigate bone mineral density (BMD) at the hip and spine, and the prevalence of low BMD, in a cohort of retired rugby players.	Retired rugby players (77 males; 25.8 years competitive rugby; 10.6 years since retirement; 36 former professional; 41 former amateur level) were separated into two groups: over 50 years of age (n = 27; 57.2 ± 7 years; 175.8 ± 7.6 cm; 94.9 ± 16.9 kg) and under 50 years (n = 50; 40.1 ± 6.2 years; 182.1 ± 6.4 cm; 101.9 ± 13.8 kg). Each participant received dual energy X-ray absorptiometry scans (Lu…				Other	Physical Health		Our findings suggest that participation in high impact sports during young adulthood might not be sufficient to reduce the risk of osteoporosis in later life. Further research is needed to identify why some former rugby players have low BMD and others don't. This research would have the potential to inform assumptions on the role of exercise for bone health throughout the lifespan	Physical Health and Function		Metabolic Health and Function
The prevalence of hand and wrist osteoarthritis in elite former cricket and rugby union players	Jones et al	2019	UK	This study aimed to determine the prevalence of hand and wrist osteoarthritis in former elite cricket and rugby union players, by sport and playing position, and to define the prevalence of severe hand injury, and its association with hand osteoarthritis.	Data from cross-sectional studies of former elite male cricket and rugby players were used to determine the prevalence of hand pain, physician-diagnosed osteoarthritis, and previous severe injury. Multivariable logistic regression was used to determine the association of previous injury with pain and osteoarthritis. Data from 229 rugby players were available. Complete case analysis resulted in 14…				Elite Male Rugby Union	Long-Term Outcomes		Both groups reported similar prevalences of severe hand injury (36.2% of cricket players and 31.4% of rugby players). Hand pain was significantly more prevalent in former cricket players than former rugby players (19.7% versus 10.0%). Among rugby players,forwards reported more hand pain (14.3%) and hand OA (4.8%) than backs. Physican-diagnosed 1) Hand OA: 3.6% 2) Wrist OA: 2.1%	Physical Health and Function		Musculoskeletal Health and Function
Relation between the experience of major joint injury in collegiate athletic activity and arthralgia in later life	Torii	2005	Japan	To investigate the relation between major joint injury in collegiate athletic activity and degenerative joint disorder and pain in later life	Surveyed the alumni of nine athletic clubs aged 45 years old and above considering the characteristics of the athletic activity using a questionnaire	NA	NA	760 alumni responded (the response rate was 36.2%)	Other	Long-Term Outcomes		Significant relations were observed in former rugby players between knee injury and knee pain and between ankle injury and ankle pain	Physical Health and Function		Musculoskeletal Health and Function
Premature onset of degenerative disease of the cervical spine in rugby players	Scher	1990	South Africa	To assess whether rugby players are prone to the development of premature degenerative disease,	Radiographs of the cervical spines of 150 rugby players were compared with a control group of 150 male hospital patients	NA	NA	150 club rugby players	Amateur Male Rugby Union	Long-Term Outcomes		Rugby players showed premature and advanced changes of degenerative disease when compared with the control group. These changes were most marked in the cervical spines of the tight forwards	Physical Health and Function		Musculoskeletal Health and Function
The cervical spine of professional front-row rugby players: correlation between degenerative changes and symptoms	Hogan et al	2010	Ireland	To evaluate degenerative changes of the C-spine and associated symptomatology in front-row rugby players.	C-spine radiographs from 14 professional rugby players and controls were compared. Players averaged 23 years of playing competitive rugby. Two consultant radiologists performed a blind review of radiographs evaluating degeneration of disc spaces and apophyseal joints. Clinical status was assessed using a modified AAOS/NASS/COSS cervical spine outcomes questionnaire				Elite Male Rugby Union	Long-Term Outcomes		Front-row rugby players exhibited significant radiographic evidence of C-spine degenerative changes compared to the non-rugby playing controls. However, these changes do not manifest themselves clinically or affect activities of daily living	Physical Health and Function		Musculoskeletal Health and Function
Vertebral body anomalies on bone density scans in younger and older retired rugby players: the UK Rugby Health project	Entwistle et al	2018	UK	To quantify vertebral body exclusions in a UK cohort of younger and older retired rugby players.	Retired rugby players (77 males; 10.6 yrs post retirement) aged 50 years or over (n = 27, 57.2 ± 7 years; 175.8 ± 7.6 cm; 94.9 ± 16.9 kg) and under 50 years (n = 50;40.1 ± 6.2 years; 182.1 ± 6.4 cm; 101.9 ± 13.8 kg) received one DXA scan of the anteroposterior lumbar spine (L1-L4; Lunar iDXATM; GE Healthcare, WI; Encore software v 15.0). A DXA scan of the dual femur was also performed. T-scores w…				Other	Physical Health		In this cohort of UK retired rugby players, a high number of vertebral body anomalies were identified. Therefore, our findings demonstrate the need for care when interpreting lumbar spine bone density DXA scans. We also suggest that vertebral body exclusions apply to Z-scores as well as T-scores where there is evidence of FSA or BMD discrepancy. It is recommended that hip scans are conducted alon…	Physical Health and Function		Musculoskeletal Health and Function
Joint replacement and health-related quality of life amongst former rugby players	Davies et al	2017	UK	The aim of this study is to establish the prevalence of joint replacement, hip and knee replacement, and health-related quality of life amongst elite former rugby players, and to compare this with data from nationally representative population-based surveys.	cross-sectional questionnaire study was carried out amongst former university and International rugby players. Players were asked a brief medical history of physician-diagnosed morbidity, questions surrounding their sporting exposure, experience of injury and current health. Players' health-related quality of life was assessed using the EQ-5D. The population-based survey, the English Longitudinal…				Other	Long-Term Outcomes		This study suggests that the prevalence of joint replacement differs between former rugby players and ELSA participants. The odds of joint replacement, particularly hip replacement, were significantly higher for former players than for ELSA participants. Healthrelated quality of life also differs, notably in the domains of pain/discomfort, mobility and usual activities. These findings suggest tha…	Physical Health and Function		Musculoskeletal Health and Function
Is rugby playing load predictive of lower limb osteoarthritis in former international rugby players?	Davies et al	2016	UK	The aim of this study was to describe the prevalence of OA within a cohort or former elite International rugby players, and examine which potentially modifiable rugby-related and injury-related risk factors are most predictive of OA-related outcomes.	A cross-sectional questionnaire was sent to former English International rugby players. Both postal and online recruitment strategies were used. Players received an initial overview describing the study’s aims and objectives before its launch, a formal approach to participate following its launch, and reminder communications. Former players reported their playing history, injury history, family h…				Elite Male Rugby Union	Long-Term Outcomes		This study has described the prevalence of OA-outcomes in this population, and demonstrates a higher prevalence of hip and knee OA than many other population-based studies which range from 5.4 to 14.3 for symptomatic radiographic OA of the knee and 0.7–5.5 for symptomatic radiographic OA of the hip. The association of rugby injury (any, knee and hip) with OA reaffirms data previously published, s…	Physical Health and Function		Musculoskeletal Health and Function
Effect of Exposure to Contact Sport Participation on Cervical Spine Sensorimotor Function	Cheever	2018	USA	The purpose of this study was to examine the effect of contact sport participation on cervical sensorimotor function.	The independent variables were group (rugby, non-contact), sex (male, female), and time (pre-season, post-season). The primary dependent variable was neck position sense error as measured by total neck reposition (TNRE) error and maximum neck reposition error (MaxNRE). Secondary dependent variables included neck disability index, signs and symptom (S/S) number, symptom severity, concussion histor…				Other	Physical Health		Rugby athletes exhibited significantly greater neck reposition sense error than controls. Additionally, concussion S/S scores were related to reposition sense error. Differences in position sense error were not identified between males and females, however females did exhibit less neck strength mirroring previous reports. These findings suggest that exposure to contact sport-related impacts may l…	Physical Health and Function		Musculoskeletal Health and Function
The Incidence of Injuries and Epidemiology of Osteoarthritis in Retired, Amateur, Rugby Union Players	Burgess et al	2017	UK	To determine the Incidence of Injuries and Epidemiology of Osteoarthritis in Retired, Amateur, Rugby Union Players	Two-hundred retired, amateur rugby union players (43±11 years) and two-hundred healthy males (38±8 years) completed online and paper questionnaires, including sections on: sporting, injury and medical history, adapted from USA rugby (2015). Age, height, weight, musculoskeletal disorders, injury history, affected joints, career duration, reason for retirement and previous surgery were recorded				Amateur Male Rugby Union	Long-Term Outcomes		There was a 34.5% (odds ratio (OR) 6.37; 95% confidence interval (CI) 3.83-10.60) higher prevalence of clinical OA within the exrugby union players, when compared to the untrained males. Prevalence of OA increased linearly with career duration (p=0.001) and the site of the disease often reflected the joint where a previous rugby union injury or trauma had occurred.	Physical Health and Function		Musculoskeletal Health and Function
Clinical and radiological cervical spine evaluation in retired professional rugby players	Brauge et al	2015	France	Using clinical and MRI evaluation, we aimed to determine if former professional rugby players had more serious degenerative cervical spine symptoms than the general population.	Two groups, one composed of 101 former rugby players (all men, mean age 40.3 years, range 35–47 years, SD 2.3 years) and the other of 85 male volunteers serving as a control group (mean age 41.6 years, range 35–49 years, SD 4.5 years) were studied. The former rugby players were evaluated on average 5.8 years after retirement (range 1–16 years, SD 3.5 years). The groups were matched in terms of se…				Elite Male Rugby Union	Long-Term Outcomes		Our results indicate that, due to their former sporting activity, young retired professional rugby players have more degenerative cervical lesions and clinical consequences than the general population. Significantly more former rugby players than controls complained of chronic neck pain (51 [50.50%] of 101 vs27 [31.76%] of 85, p = 0.01). Rugby players also had significant reductions of neck mobil…	Physical Health and Function		Musculoskeletal Health and Function
Incidence of cervical spine degenerative complications in former professional rugby players	Brauge et al	2013	France	The aim of this study was todetermine whether professional rugby causes more severe or frequentcervical spine degenerative diseases	The clinical analysis took into account 5criteria: VAS, the NDI score, joint range of movement, the JOA score(neurological examination) and history of cervical spine surgery fordegenerative disease. We also gave 50 of the participants an MRI, again taking into account5 criteria: the Matsumoto score, canal to body ratio, peri-spinalmuscle mass, spinal cord damage (T2 signal hyperintensity orsyring…				Elite Male Rugby Union	Long-Term Outcomes		We report the findings of a study which shed light on howthe spine ages in professional rugby players. Generally speaking,despite a higher incidence of symptoms and more pronounced dam-age seen on the MRI, these former professional sportsmen did notappear to be troubled by their cervical spine. However, it would beinteresting to repeat this type of study after a longer follow-up periodto confirm …	Physical Health and Function		Musculoskeletal Health and Function
Age-related changes in the cervical spines of front-line rugby players	Berge et al	1999	France	The aim of this study was to compare the changes in the cervical spine of players at different points in their careers.	Magnetic resonance imaging scans of the cervical spine were performed on 47 rugby players and 40 age-matched control subjects. A study of cervical spine changes, including spinal curve, spinal constituents, posttraumatic deformities, and degenerative modifications, was completed by a study of cervical measurements				Other	Long-Term Outcomes		Front-line rugby players showed more early degenerative alterations on magnetic resonance imaging scans than did the control subjects of the same age. These changes correlated with age and were probably linked with repetitive cervical trauma throughout the players' careers	Physical Health and Function		Musculoskeletal Health and Function
Sport practice and osteoarthritis of the limbs	Lequesne et al	1997	France	To determine if sports participation a risk factor for osteo-arthritis (OA) of the limbs?	Narrative review	NA	NA	NA	Other	Long-Term Outcome		OA often occurs at a relatively early age in adult life, in certain sports (soccer, rugby, racket sports and other track and field sports) and under certain conditions (high level of practice).	Physical Health and Function		Musculoskeletal Health and Function
Effect of Exposure to Contact Sport Participation on Cervical SpineSensorimotor Function	Cheever et al	2018	USA	The purpose of this study was to examine the effect of contact sport participation on cervical sensorimotor function	he independent variables were group (rugby, non-contact), sex (male, female), and time (pre-season, post-season). The primary dependent variable was neck position sense error as measured by total neck reposition (TNRE) error and maximum neck reposition error (MaxNRE). Secondary dependent variables included neck disability index, signs and symptom (S/S) number, symptom severity, concussion history…				Amateur Male Rugby Union	Physical Health		The present study findings indicate a difference in cervical spine sensorimotor function between collegiate club rugby athletes and controls. Specifically, rugby athletes exhibited significantly greater neck reposition sense error than controls. Additionally, concussion S/S scores were related to reposition sense error. Differences in position sense error were not identified between males and fem…	Physical Health and Function		Musculoskeletal Health and Function
Blood metabolic response to a long-term wheelchair rugby training	Sadowska-Krepa et al	2016	Poland	To evaluate the effects of long-term wheelchair rugby (WR) training on lipid profile, blood antioxidant status and the brain-derived neurotrophic factor (BDNF) level.	Fasting blood samples were collected at rest for assessment of activities of antioxidant enzymes, concentrations of reduced glutathione, uric acid, malondialdehyde (MDA), lipid profile measures and BDNF.			Thirty-two males with chronic cervical spinal cord injury (SCI) assigned into the physically active ‘low-point’ (LP, n=15) or ‘high-point’ (HP, n=8) WR players groups and the sedentary manual wheelchair users (SED, n=9) participated in this study.	Wheelchair Rugby	Physical Health		A voluntary participation in a long-term WR training program has several health promoting outcomes for individuals with chronic SCI. Among the most important are enhancement of the blood antioxidant defense capacity evidenced by lower MDA and higher EAP levels, as well as WR training-induced activation of BDNF signaling.	Physical Health and Function		Immunological Health and Function
Differences in the acute inflammatory and glucose regulatory responses between small-sided games and cycling in sedentary, middle-aged men	Mendham et al	2015	Australia	This study compared the acute inflammatory and glucose regulatory response within and between rugby specific small-sided games and stationary cycling in sedentary, middle-aged Caucasian men.	DESIGN: Nine middle-aged, sedentary men who were free from disease participated in 2 x 40 min exercise conditions (stationary cycling and small-sided games) in a randomised, cross-over design. METHODS: Heart rate and Rating of Perceived Exertion were collected during each bout. Venous blood was collected at fasting, 0, 30, 60 and 240 min post-exercise for measurement of glucose, insulin, cortisol…				Male Touch Rugby	Physical Health		Both small-sided games and stationary cycling conditions were sufficient to stimulate an acute anti-inflammatory response as indicated by the post-exercise elevation of interleukin-6, interleukin-1 receptor agonist and cortisol. The novel findings are that an acute bout of small-sided games bout is capable of maintaining an elevated post-exercise interleukin-6 response and lowered blood glucose c…	Physical Health and Function		Immunological Health and Function
Similar mitochondrial signaling responses to a single bout of continuous or small-sided-games-based exercise in sedentary men	Mendham et al	2016	Australia	This study assessed the mitochondrial related signaling responses to a single bout of noncontact, modified football (touch rugby), played as small-sided games (SSG), or cycling (CYC) exercise	n a randomized, crossover design, nine middle-aged, sedentary, obese men completed two, 40-min exercise conditions (CYC and SSG) separated by a 21-day recovery period. Heart rate (HR) and ratings of perceived exertion (RPE) were collected during each bout. Needle biopsies from the vastus lateralis muscle were collected at rest and 30 and 240 min postexercise for analysis of protein content and ph…				Male Touch Rugby	Physical Health		The similar PGC-1alpha response between intensity-matched conditions suggests both conditions are of similar benefit for stimulating mitochondrial biogenesis. Differences between conditions regarding fluctuation in exercise intensity and type of muscle contraction may explain the increase of p53 and AMPK within CYC and not SSG (noncontact, modified football).	Physical Health and Function		Immunological Health and Function
Immunity, inflammatory and psychophysiological stress response during a competition of professional rugby union	Lindsay et al	2015	NZ	To determine what effect a professional rugby competition has on the immunity, inflammatory and psychophysiological stress response	rine and saliva were collected from 37 professional players at regular intervals throughout a 20 week professional competition. Total neopterin, cortisol and secretory immunoglobulin A were analysed using enzyme linked immunosorbant assay (ELISA) and high performance liquid chromatography (HPLC)				Elite Male Rugby Union	Physical Health		This (Super Rugby) competition of professional rugby does not cause significant changes in psychophysiological stress. Some players however, may become more susceptible to fatigue and infection during the course of a season as a result of suppressed immunity and sustained activation of the inflammatory response.	Physical Health and Function		Immunological Health and Function
Mucosal immune and physiological responses to exercise in wheelchair athletes	Leicht	2012	UK	The aim of this study was to examine salivary secretory immunoglobulin A (sIgA) responses and -amylase activity following constant load and intermittent exercise in elite wheelchair athletes.	Twenty-three wheelchair athletes divided into three subgroups (8 tetraplegic (TETRA), 7 paraplegic (PARA), and 8 non-spinal cord-injured (NON-SCI)) performed two randomised and counterbalanced 60-min sessions on a treadmill. These consisted of a constant load (60% peak oxygen uptake (V O2peak)) and an intermittent (80% and 40%V O2peak) exercise block. Timed, unstimulated saliva samples were obtai…				Wheelchair Rugby	Physical Health		The most extensive study of this thesis, detailed in Chapter 6, showed that single laboratory-controlled 60-min exercise sessions increase both salivary secretory immunoglobulin A (sIgA), a marker of mucosal immunity, and α-amylase, a marker of sympathetic activation in all three disability subgroups. However, the impaired sympathetic nervous system in tetraplegic athletes seemed to influence the…	Physical Health and Function		Immunological Health and Function
The microbiome of professional athletes differs from that of more sedentary subjects in composition and particularly at the functional metabolic level	Barton et al	2018	Ireland	It is evident that the gut microbiota and factors that influence its composition and activity effect human metabolic, immunological and developmental processes. We previously reported that extreme physical activity with associated dietary adaptations, such as that pursued by professional athletes, is associated with changes in faecal microbial diversity and composition relative to that of individ…	Metabolic phenotyping and functional metagenomic analysis of the gut microbiome of professional international rugby union players (n=40) and controls (n=46) was carried out and results were correlated with lifestyle parameters and clinical measurements (eg, dietary habit and serum creatine kinase, respectively)				Elite Male Rugby Union	Physical Health		Our original observation of differences in gut microbiota composition in elite athletes is confirmed and the separation between athletes and those with a more sedentary lifestyle is even more evident at the functional or metabolic level. Microbial-derived SCFAs are enhanced within the athletes. Metabolites such as short-chain fatty acids (SCFAs) have an impact on a range of health parameters incl…	Physical Health and Function		Immunological Health and Function
Thoracoabdominal mobility is improved in subjects with tetraplegia after one year of wheelchair rugby training	Sarro et al	2016	Brazil	To analyse the effect of one year of wheelchair rugby training on thoracoabdominal mobility and its association with lung volume in adults with tetraplegia.	At the beginning and after one year of training, lung volume and tridimensional mobility of four-chest wall compartments (superior and inferior thorax, superior and inferior abdomen) were obtained by spirometric testing and kinematic analysis, respectively.	One year	Participants (10 male adults with chronic spinal cord injury at cervical level) underwent to regular training in wheelchair rugby	10 male adults with chronic spinal cord injury at cervical level - seven completed the study	Wheelchair Rugby	Physical Health		During quiet breathing, significant improvements and linear relationships were observed for the tidal volume (16.9%), superior thorax (61.3%) and inferior thorax mobility (83.7%). During maximal breathing, significant improvements were found for the vital capacity (24.8%) and superior thorax mobility (31.5%). Besides that, there was also a significant linear relationship between the vital capacit…	Physical Health and Function		Respiratory Health and Function
Effects of wheelchair sports on respiratory muscle strength and thoracic mobility of individuals with spinal cord injury	Moreno et al	2012	Brazil	The aim of this study was to evaluate the effects of wheelchair sports on respiratory muscle strength and the thoracic mobility of individuals with spinal cord injury.	Thirty male subjects with chronic spinal cord injury (American Spinal Injury Association Impairment Scale grade A) took part in the study and were divided into four groups: sedentary subjects with quadriplegia (S-QUAD, n = 7), wheelchair rugby athletes with quadriplegia (A-QUAD, n = 8), sedentary subjects with paraplegia (S-PARA, n = 6), and wheelchair basketball athletes with paraplegia (A-PARA,…				Wheelchair Rugby	Physical Health		Physical training seems to have a positive influence on respiratory muscle strength and thoracic mobility of subjects with greater respiratory impairment, such as those with quadriplegia	Physical Health and Function		Respiratory Health and Function
Wheelchair rugby improves pulmonary function in people with tetraplegia after 1 year of training.	Moreno et al	2013	Brazil	This study investigated the effects of 1 year of regular wheelchair rugby training on the pulmonary function of subjects with tetraplegia.	A total of 15 male subjects with tetraplegia participated in this study and were divided into an experimental group of rugby players (n = 8) and a control group (n = 7) of sedentary tetraplegic subjects. Both groups underwent spirometry, and the experimental group was tested before and after participating of a regular 1-year program of wheelchair rugby training.				Wheelchair Rugby	Physical Health		There were a significant increase in forced vital capacity (FVC), forced expired volume after 1 second (FEV1), and maximal voluntary ventilation (MVV, p < 0.05) values after 1 year of regular wheelchair rugby training. The regression analysis between total training time and spirometric variables FVC (r2 = 0.97, p < 0.0001) and MVV (r2 = 0.58, p = 0.02) revealed that the players with longer traini…	Physical Health and Function		Respiratory Health and Function
Reduced processing speed in rugby union players reporting three or more previous concussions	Gardner et al	2010	Australia	The present study sought to examine possible detrimental cognitive effects in a sample of adult male rugby union players who reported a history of three or more concussions compared with those who reported no previous concussions	A computerized neuropsychological battery and a traditional neuropsychological measure of processing speed were administered for this purpose. N=34 of individuals with history of three or more concussions, compared with N=39 of those who reported no previous concussions				Amateur Male Rugby Union	Physical Health		This study has demonstrated that adult male rugby union players reporting three or more previous concussions demonstrate significantly reduced performance on a computerized measure of visual motor speed and a traditional measure of processing speed, compared with rugby union players with no self-reported history of concussion. Interestingly, despite finding no athlete from either group performed …	Physical Health and Function		Neurological Health and Function
Abnormalities of transcranial magnetic stimulation in rugby players: A possible diagnostic tool for the identification of players at risk for symptomatic cervical myeloradiculopathy?	Gaetani et al	2016	Italy	Transcranial magnetic stimulation in rugby players: A possible diagnostic tool for the identification of players at risk for symptomatic cervical myeloradiculopathy?	e performed a neurological evaluation and examined 29 rugby players with electromyography (EMG) and transcranial magnetic stimulation (TMS) studies. 28 healthy volunteers were studied as a control group. A magnetic resonance imaging (MRI) study was performed on players with abnormal findings at the TMS testing.				Other	Physical Health		No neurological anomalies were present in both groups. Significant slower central conduction times were recorded in the TMS studies of the left ulnar nerve, both right and left tibial nerves and, considering the F-wave evaluation, of the right ulnar nerve and the left tibial nerve of the rugby players	Physical Health and Function		Neurological Health and Function
Elevated Systemic Oxidative-Nitrosative Stress and Cerebrovascular Function in Professional Rugby Union Players: The Link to Impaired Cognition	Owens et al	2018	UK	The present study hypothesised that recurrent concussion in current professional rugby union players would result in elevated systemic oxidative-nitrosative stress, reflected by a free radical-mediated reduction in nitric oxide (NO) bioavailability and impaired cerebrovascular and cognitive function.	A longitudinal study design was adopted across the 2017-2018 rugby union season. Pre-season measurements were performed for cerebrovascular function (Doppler ultrasound of middle cerebral artery velocity (MCAv) in response to hypocapnia/normocapnia/hypercapnia), cephalic venous concentrations of the ascorbate radical (A•-, electron paramagnetic resonance spectroscopy), NO (ozone-based chemilumine…			Participants were initially divided into two subgroups; 23 professional rugby union players (aged 26 ± 5 years) and 22 non-concussed controls (27 ± 8 years)	Elite Male Rugby Union	Long-Term Outcomes		The rugby group performed worse in the Ray Auditory Verbal Learning Test B (RAVLT-B, learning, and memory) and the Grooved Pegboard test using both the dominant and non-dominant hands (visuomotor coordination, P < 0.05 vs. control). There were no between-group differences in cerebral perfusion at baseline (MCAv: 54 ± 13 vs. 59 ± 12, P > 0.05). Likewise, no between-group differences in CVRCO2Hypo …	Physical Health and Function		Neurological Health and Function
2015 Parapan American Games: Does physical activity participation improve cerebrovascular function after high-level spinal cord injury?	Phillips et al	2016	Canada	To examine the role physical activity plays in cerebrovascular function after SCI.	Both SCI groups suffered motor complete SCI (>T6 spinal segment). In the seated position, blood velocities in the middle and posterior cerebral arteries (MCA, PCA; transcranial Doppler and beat-by-beat BP (photoplethymography)) were recorded continuously. Thereafter, validated tests of NVC (visual stimulation), dCA (transfer function analysis), attention/concentration (Stroop test) and moderate t…	NA	NA	9 wheelchair rugby national teams [SCIa; n=19]), relatively inactive SCI controls (SCIb; n=9), and age-matched able-bodied individuals (AB; n=11)	Wheelchair Rugby	Physical Health		Physically active individuals with SCI exhibit improved dynamic cerebral autoregulation and cognitive function; these changes may help compensate for the persistent impairment in NVC and thereby prevent vascular cognitive decline	Physical Health and Function		Neurological Health and Function
Cumulative mild head injury (CMHI) in contact sports: an evaluation of pre and post season cognitive profiles rugby players compared with non-contact sport controls at the University of Limpopo	Rapetsoa	2015	South Africa	To evaluate if CMHI in rugby (contact sport) affects the cognitive profiles of rugby players (contact sports), compared with a non-contact sport (volleyball) controls pre and post season at the University of Limpopo (Turfloop campus).	2x Questionnaires, Neuropsychological test battery (A modified version of a neuropsychological test battery utilising specific tests on The Wechsler Adult Intelligence Scale (WAIS IV, 2013) was used in line with previous studies at Rhodes University),			A sample of 18 student rugby players and 18 volleyball (non-contact sport) controls was used.	Youth Male Rugby Union	Long-Term Outcomes		In terms of mean performances the tests did not reveal a consistent pattern of deficits which is typically associated with the effects of Cumulative Mild Head Injuries. There were significant results however, in terms of variability that suggestspotential deficits in attention among the rugby group. The results are therefore indicative of a poorer overall cognitive profile for the rugby playing g…	Physical Health and Function		Neurological Health and Function
Chronic Traumatic Encephalopathy and Neurodegeneration in Contact Sports and American Football	Zuckerman et al	2018	USA	1) Describe the history of CTE, 2) review current CTE definitions, 3) critically evaluate the empiric data, divided into all contact sports and exclusively American football, and 4) summarize notable themes for future research.	Narrative review	NA	NA	NA	Other	Long-Term Outcomes		1) Association between CTE pathology and rugby has been limited to case series 2) Studies of long-term outcomes in former rugby participation have been generally equivocal 3) Former elite rugby athletes who averaged 22 years of sport exhibited similar long-term rates of dementia and depression following retirement compared to population-based SMR (even when controlled for age)	Physical Health and Function	Mental Health and Function	Neurological Health and Function
Cumulative concussion exposure in rugby players: neurocognitive and symptomatic outcomes	Thornton et al	2008	Canada	To determine the impact of self-reported concussion exposure	We evaluated the neurocognitive and symptomatic consequences of concussions in competitive, retired and recreational rugby players who estimated sus- taining between 0 and 24 Grade 2 and 3 concussions. 111 players in total. Of the 124 total participants recruited, a final sample of 111 participants met the study’s inclusion CONCUSSION EXPOSURE IN ATHLETES 399 400 THORNTON ET AL. criteria. All par…				Other	Long-Term Outcomes		The extent of concussion exposure was associated with increased memory complaints and overall post-concussion syndrome endorsements in a dose-dependent manner for retired and older recreational players, but not for those who were younger and playing at more competitive levels. We evaluated the neurocognitive and symptomatic consequences of concussions in competitive, retired and recreational rugb…	Physical Health and Function		Neurological Health and Function
Chronic traumatic encephalopathy: a potential late and under recognized consequence of rugby union?	Stewart et al	2016	Ireland	To present the first comprehensive case report of CTE in a former amateur rugby union player in whom the diagnosis in life was unclear, but confirmed as CTE at autopsy. The implications of this case and our current understanding of CTE are then reviewed.	Case-report & review	NA	NA	One patient	Amateur Male Rugby Union	Long-Term Outcomes		The first comprehensive report of pathologically confirmed CTE in a former rugby union player which adds to current understanding of CTE in contact sports. In particular, the possibility of under-recognition and, with that, under-diagnosis is raised. With increased awareness of CTE, we would suggest the diagnosis might be considered in any patient presenting to dementia services with a prior hist…	Physical Health and Function		Neurological Health and Function
Long-term cognitive outcomes in male and female athletes following sport-related concussions	Sicard et al	2018	Canada	To examine whether sex influences the long-termcognitive outcomes of athletes with a history of concussion	96 asymptomatic student-athletes participated in the study (98 with a HOC; 98 matchedcontrols). The sample included both male (n = 98) and female athletes (n = 98). Participants completed theCogstate brief battery, to which we added a 2-Back condition to increase cognitive load	NA	NA	98 asymptomatic athletes with a history of concussion; 98 matched controls. 30 rugby players in total	Other	Long-Term Outcomes		The current results reaffirm the presence of subtle, yet long-term alterationsin aspects of executive functions following a sport-related concussion	Physical Health and Function		Neurological Health and Function
Neurocognitive vulnerability amongst university rugby players versus noncontact sport controls	Shuttleworth-Edwards et al	2008	South Africa	To determine neurocognitive vulnerability amongst university rugby players versus noncontact sport controls	University rugby players were compared with IQ-equivalent noncontact sports controls on memory and attentional tasks at the pre- and postseason intervals. The final sample consisted of rugby (n = 27; mean age = 19.85, SD = 1.46; mean educational level = 13.22, SD = 1.09) and controls (n = 18; mean age = 23.39, SD = 3.87; mean educational level = 14.78, SD = 1.77).				Amateur Male Rugby Union	Long-Term Outcomes		Results revealed significant lowering for rugby players relative to controls at the postseason interval for attentional tasks with a speeded visuomotor component. Medium to large effect sizes implicate clinically relevant cognitive vulnerability for university-level rugby players in association with years of exposure to repetitive concussive injury.	Physical Health and Function		Neurological Health and Function
Do cumulative mild head injuries in rugby affect neuropsychological performance?: a comparative study between club rugby players and non-contact sport athletes	Pentz	2008	South Africa	This study aimed to investigate subjects exposed to mild head injuries with the aim of determining if neuro logical sequelae are detectable. The objectives ofthis study were to evaluate changes in neuropsychological performance over a period of playing rugby for one full season, which extended over nine months	Neuropsychological functioning in recently concussed athletes was compared with that of non-injured (control) athletes to detect whether neurological sequelae were present.	35 club rugby players and 35 non-contact sports athletes were assessed over a period of 9 months. Both groups underwent pre-season baseline testing and post-season testing. A comprehensive battery of reliable and valid neuropsychological tests was used to assess these subjects, with particular focus on the following 5 areas of cognition: planning, visuo spatial and constructional ability; attenti…			Amateur Male Rugby Union	Long-Term Outcomes		The data showed that significant differences occurred in rugby players participating regularly in the sport over one full season in terms of changes in neuropsychological test performance in a range of cognitive domains, including planning, visual spatial and constructional ability, attention and concentration, memory and verbal fluency.	Physical Health and Function		Neurological Health and Function
Long-term health outcomes after exposure to repeated concussion in elite level: rugby union players	McMillan et al	2017	UK	To describe long-term health outcomes after exposure to repeated concussion in elite level rugby union players	Outcome after exposure to repeated brain injury was investigated in 52 retired male Scottish international rugby players (RIRP) and 29 male controls who were similar in age and social deprivation. Assessment included history of playing rugby and traumatic brain injury, general and mental health, life stress, concussion symptoms, cognitive function, disability and markers of chronic stress (allost…				Elite Male Rugby Union	Long-Term Outcomes		There were no significant associations between number of concussions and performance on cognitive tests. Other than a higher incidence of cardiovascular disease in controls, no group differences were detected in general or mental health or estimates of allostatic load. In RIRP, persisting symptoms attributed to concussion were more common if reporting more than nine concussions (p=0.028), althoug…	Physical Health and Function		Neurological Health and Function
New Zealand rugby health study: motor cortex excitability in retired elite and community level rugby players	Lewis et al	2017	NZ	The aim of the study was to assess measures of corticomotor excitability and inhibition in retired rugby players in comparison to retired non-contact sport players.	The design was a cross-sectional study with three groups of retired athletes: elite rugby (n=23), community level rugby (n=28) and non-contact sport control (n=22). Assessments of corticomotor excitability were made using transcranial magnetic stimulation.				Other	Long-Term Outcomes		Resting motor threshold was significantly higher and long-interval intracortical inhibition was greater in the elite rugby group compared to the control group. Participants in the two rugby groups had sustained significantly more concussions than the control group. We provide some evidence of altered corticomotor excitation and inhibition in retired elite rugby players in comparison to retired no…	Physical Health and Function		Neurological Health and Function
Increased myo-inositol in primary motor cortex of contact sports athletes without a history of concussion	Lefevbre et al	2018	Canada	The objective of the study was to determine whether repetitive hits to the head at a subclinical level are associated with structural and functional brain abnormalities and whether these effects are influenced by high levels of fitness associated with intense physical activity	Seventy-two college students were recruited: 24 nonathletic, 24 athletes practicing a varsity contact sport, and 24 athletes practicing a varsity noncontact sport. They were recruited for a neuropsychological evaluation and a magnetic resonance imaging session that included magnetic resonance spectroscopy of primary motor cortex (M1) and prefrontal cortex and susceptibility-weighted imaging				Other	Long-Term Outcomes		There was no evidence for reduced cognitive performance or presence of micro bleeds in contact sports athletes. Abnormalities in contact sports athletes were found for myo-inositol concentration (mIns) in M1, where levels were significantly higher compared with noncontact sports athletes (p = 0.016) and nonathletes (p = 0.029). In prefrontal cortex, glutamate + glutamine (Glx) was significantly r…	Physical Health and Function		Neurological Health and Function
Normal Cognitive Function Following Self-reported "Dings" In A Cohort Of Collegiate Rugby Players	Hunt et al	2012	USA	This study examined if self-reported “dings” result in decreases in cognitive function as measured by ImPACT	This study was a prospective cohort design. Collegiate rugby football athletes were observed on-field throughout their fall competitive season. Fourteen collegiate rugby players (age 21.5 + 1.34 years) participated in the study. All athletes completed ImPACT to establish a baseline prior to the competitive season. After the completion of their competitive season, all participants were re-tested u…				Amateur Male Rugby Union	Physical Health		These findings suggest that deficits were not observed following one competitive season of rugby regardless of self-reported dings. A higher mean and confidence interval for impulse control existed which may indicate a long-term effect on impulse control following dings.	Physical Health and Function		Neurological Health and Function
A Comparison of Cognitive Function in Former Rugby Union Players Compared with Former Non-Contact-Sport Players and the Impact of Concussion History	Hume et al	2017	NZ	To investigate differences in cognitive function between former rugby and non-contact-sport players, and assessed the association between concussion history and cognitive function	366 former players (mean ± standard deviation [SD] age 43.3 ± 8.2 years) were recruited from October 2012 to April 2014. Engagement in sport, general health, sports injuries and concussion history, and demographic information were obtained from an online self-report questionnaire. Cognitive functioning was assessed using the online CNS Vital Signs neuropsychological test battery. Cohen’s d effect…				Other	Long-Term Outcomes		The elite-rugby group (n = 103) performed worse on tests of complex attention, processing speed, executive functioning, and cognitive flexibility than the non-contactsport group (n = 65), and worse than the community-rugby group (n = 193) on complex attention. The communityrugby group performed worse than the non-contact group on executive functioning and cognitive flexibility. Compared with US n…	Physical Health and Function		Neurological Health and Function
The End Of Season Electroencephalographic And Neuropsychological Status Of School Rugby Players With Very Mild Traumatic Brain Injury	Dijkstra et al	2005	South Africa	The aim of this study was to compare the end of season neuropsychological, electroencephalographic (EEG) status, and academic performance of players in a secondary school rugby team who, during the course of the season sustained only repetitive vMTBI to those players who sustained mild traumatic brain injuries (MTBI) and a sedentary control group.	A cohort of 20 secondary school male rugby players was followed for a season. A sports physician documented all vMTBI and MTBI injuries. At the end of the season, the players were divided into a vMTBI group [N=11, 17.9 (0.54) yrs], and a MTBI group [N=9, 17.5 (0.88) years] according to the injuries sustained during the season. At the end of the season an EEG-test was done on each subject accordin…				Youth Male Rugby Union	Physical Health		Subtle EEG changes at the end of the rugby season are present in school rugby players who sustained vMTBI and MTBI during a single rugby season.	Physical Health and Function		Neurological Health and Function
Long-term consequences of recurrent sports concussion	Decq et al	2016	France	The study was designed to assess the prevalence of major depressive disorder, mild cognitive disorders and headache in a population of retired high-level sportsmen and rugby players and to study the link between scores evaluating these disorders and the number of reported concussions (RCs).	A total of 239 retired rugby players (RRPs) and 138 other retired sportsmen (ORSs) who had reached the French national or international championship level between 1985 and 1990 filled in a self-administered questionnaire describing their sociodemographic data, comorbidities and reported history of RC. A phone interview was then conducted using validated questionnaires for the detection of major d…				Elite Male Rugby Union	Long-Term Outcomes		More than 20 years after the end of their career, RRPs present higher rates of depression and lower F-TICS-m scores in favor of mild cognitive impairment compared with ORSs. PHQ-9 and HIT-6 scores were significantly associated with the number of RCs. However, no increased incidence of clinically significant episodes of depression or cognitive decline was observed in this population of retired spo…	Mental Health and Function	Physical Health and Function	Neurological Health and Function
Influence of playing rugby on long-term brain health following retirement: a systematic review and narrative synthesis	Cunningham et al	2018	Ireland	The aim of this review was to systematically investigate long-term brain health in retired rugby players.	Systematic Review	NA	NA	This review yielded six studies with an overall methodological quality of ‘moderate’	Other	Long-Term Outcomes		Overall findings are mixed. Methodological biases reduce the overall study quality and limited the conclusions that can be drawn. Findings of decreased fine motor control in retired athletes may be influenced by lack of controlling for evidence of upper limb musculoskeletal injuries. While some studies show evidence of reduced cognitive function among former athletes, the results are not signific…	Physical Health and Function		Neurological Health and Function
Changes in cognitive function and cerebral oxygenation patterns in rugby and non-contact sportspersons over a 15-week season	Clark	2018	South Africa	The primary aim of the study was to determine whether a fifteen-week season elicit a change in the cognitive function and cerebral oxygenation of rugby players when compared with age and sex matched non-contact athletes. The secondary aim was to determine whether changes in sleep quantity and quality, as well as mood states, took place that have the potential to impact the cognitive function and …	Twenty-nine university athletes (16 rugby players (21,3 ± 1,35 yrs) and 13 non-contact sport athletes (20,8 ± 1,97 yrs)) were assessed before and after the 2017 Varsity Cup rugby competition (± 15 weeks). Each participant completed the CNS Vital Signs® Core testing battery, with measurements of cerebral oxyhaemoglobin (∆[O2Hb]), deoxyhaemoglobin (∆[HHb]), tissue oxygenation index (TOI) and normal…				Amateur Male Rugby Union	Physical Health		Overall, cognitive function did not change for either group over the 15-week season (ES = 0,11 and 0,06 for Rugby and Control, respectively). Cerebral oxygenation measurements did not reflect any unexpected changes within the Control group, however, relative ∆[HHb] (ES = 0,57) and nTHI (P = 0,01; ES = 1,29) were significantly increased at post-testing in the rugby players. These variables are con…	Physical Health and Function		Neurological Health and Function
Do concussion dosage, gender or reported symptoms affect long-term cognitive performance and stop-signal reaction times following sportsrelated concussion/mTBI in university rugby players?	Broughton et al	2017	UK	This UK-based study aimed to investigate whether cognitive performance and self-reportedPCS symptoms of athletes (university-level rugby players)relate to SRC, and whether gender moderates these effects	Eighty-six participants completed a questionnairedetailing SRC history (frequency and severity) and self-ratedany enduring symptoms using the Sport ConcussionAssessment Tool 3 (SCAT3) symptom evaluation scales,before completing the CogState Brief Battery and a stop-signalresponse inhibition task, ‘STOP-IT’.				Amateur Male Rugby Union	Physical Health		The results present evidence that SRC has noobservable longer-term effects on cognitive test performanceor PCS symptom self-reports in young adults. However, theanalysis may have lacked power to detect small effects.Analysis of individual performance over time against baselinescores may be more relevant for accurate diagnosis thanrelying on normative test scores.	Physical Health and Function		Neurological Health and Function
Cumulative Mild Head Injury in Contact Sport: A Comparison of the Cognitive Profiles of Rugby Players and Non-contact Sport Controls with Normative Data	Bold	1999	South Africa	This study investigates the effects of cumulative mild head injury on the cognitive functioning of elite rugby players	A comprehensive battery of neuropsychological tests was administered to top national (Springbok) rugby players (n=26), national Under 21 rugby players (n=19), and a non-contact sport control group of national hockey players (n=21). The test results of the Total Rugby group (Springbok Rugby and Under 21 Rugby players), the Under 21 Rugby group, the hockey controls, and the Total Rugby and Under 21…				Other	Physical Health		Results showed significant differences in the direction of a poorer performance relative to the norms for the Total Rugby and Under 21 Rugby groups, and for the Total Rugby Forwards and Under 21 Rugby Forwards, on tests sensitive to the effects of diffuse brain damage. On the other hand, the Hockey Control group and the Total Rugby Backs and Under 21 Rugby Backs tended to perform within the norma…	Physical Health and Function		Neurological Health and Function
Cumulative Mild Head Injury in Rugby: A Comparison of Cognitive Deficit and Postconcussive Symptomatology Between Schoolboy Rugby Players and Non-contact Sport Controls	Beilinsohn	2001	South Africa	To investigate the cumulative effects of concussive and subconcussive mild head injury on the cognitive functioning of schoolboy rugby players	A comprehensive battery of neuropsychological tests and a self-report postconcussive questionnaire were administered to top level schoolboy rugby players (n=47), and a non-contact sport control group of top level schoolboy hockey players (n=34). Group comparisons of the percentage of individuals with cognitive deficit were carried out between i) the schoolboy rugby and the schoolboy hockey player…				Youth Male Rugby Union	Physical Health		Results on the neuropsychological test battery did not provide any substantial evidence of a higher level of neuropsychological impairment in the rugby players relative to the control group, or in the rugby forward players relative to the rugby backline players. Results obtained on the postconcussive symptom questionnaire provided tentative indications that the rugby players do report a greater f…	Physical Health and Function	Mental Health and Function	Neurological Health and Function
Neurobehavioural profile following cumulative mild traumatic brain injury in adolescent rugby players in South Africa	Basson et al	2017	South Africa	To investigate the neurobehavioural components of executive dysfunction following sport-related Mild Traumatic Brain Injury (MTBI) in adolescent rugby players over a rugby season	In a non-equivalent quasi-experimental design, a rugby group of Grade 12 adolescents (n = 90) were compared with demographically equivalent noncontact sport controls (n = 59). The Behaviour Rating Inventory of Executive Functions – Self Report (BRIEF-SR) was employed to assess the neurobehavioural component of executive functions . Independent and dependent t-test analyses were conducted to compa…				Youth Male Rugby Union	Rugby & Physical Activity/Physiologic Demand		The overall findings suggest more pronounced deleterious effects on executive functioning from exposure to the concussive and sub-concussive events among the rugby group . High school rugby players experience adverse neurobehavioural effects in executive dysfunction from contact rugby sport injuries. The more pronounced evidence of executive dysfunction at the end-of-season interval in the rugby …	Physical Demand		Neurological Health and Function
Cumulative mild head injury in rugby: cognitive test profiles of professional rugby and cricket players	Ancer	1999	South Africa	To investigate the effects of cumulative concussive and subconcussive mild head injury on the cognitive functioning of professional rugby players	A comprehensive battery of neuropsychological tests was administered to 26 professional rugby players and a noncontact sport control group of 21 professional cricket players. The test performances of the rugby players were compared to those of the cricket players. Within the rugby group, forward and backline players were compared				Elite Male Rugby Union	Physical Health		An analysis of mean score differences between the rugby and cricket group failed to support the presence of brain damage effects in the rugby group. However, there was significantly increased variability of scores for the rugby players compared with the cricket players on tests particularly sensitive to cognitive deficit associated with mild head injury. This invalidates the null indications of a…	Physical Health and Function		Neurological Health and Function
Mild traumatic brain injuries in early adolescent rugby players: Long-term neurocognitive and academic outcomes	Alexander et al	2015	South Africa	The objective was prospectively to investigate differences between young adolescentmale rugby players and non-contact sports controls on neurocognitive test performance over3 years and academic achievement over 6 years	A sample of boys from the same school and grade was divided into three groups:rugby with seasonal concussions (n¼45), rugby no seasonal concussions (n¼21) and non-contact sports controls (n¼30). Baseline neurocognitive testing was conducted pre-season inGrade 7 and post-season in Grades 8 and 9. Year-end academic grades were documented forGrades 6–9 and 12 (pre-high school to year of school leavi…				Youth Male Rugby Union	Physical Health		The outcome of the present study yielded some possibleindications of cognitive vulnerability in association withparticipation in rugby due to risk of cumulative mild traumaticbrain injury, especially on the long-term follow-up of theAcademic Aggregate scores. However, with the exception ofpoorer scores for the Coding Immediate Recall test, thepredominant outcome on the neurocognitive testing was …	Physical Health and Function		Neurological Health and Function
The impact of repeated mild traumatic brain injuries (concussions) on the cognitive and academic functioning of early adolescent rugby union players: A controlled, longitudinal, prospective study	Alexander et al	2007	South Africa	This study investigated, within the context of Brain Reserve Capacity (BRC) theory, whether repeated concussions resulted in residual deficits in cognitive and academic functioning of early adolescent rugby players relative to non-contact sports controls.	Participants were 150 grade 7 preparatory school boys tested pre and post three winter sport seasons using neuropsychological and academic tests. Participants were matched in terms of age, sex, grade, school, language, participation in sport, socio-economic status and estimated IQ				Youth Male Rugby Union	Physical Health		1. early adolescent rugby players experience more concussions than controls; 2. they may be more vulnerable in terms of BRC; 3. they may be compromised in terms of the development of abstract thinking and over time following repeated concussion there is a decline in their academic scores.	Physical Demand		Neurological Health and Function
Concussions in youth rugby: A prospective investigation of enduring neurocognitive and academic effects on players vs non-contact sports controls	Alexander et al	2011	South Africa	The objective was prospectively to investigate differences between young male rugby players and non-contact sports controls on neurocognitive test performance over 3 years and academic achievement over 6 years.	A sample of boys from the same school and grade was divided into three groups: rugby with seasonal concussions (n = 45), rugby with no seasonal concussions (n = 21) and non-contact sports controls (n = 30). Neurocognitive testing was conducted pre- and post-rugby season from Grades 7–9. Academic grades were documented for Grades 6–9 and 12.				Youth Male Rugby Union	Physical Health		A mixed model repeated measures ANOVA used to investigate comparative neurocognitive and academic outcomes between the three sub-groups revealed significantly lower scores for controls on the WISC-III Coding Immediate Recall sub-test. There was a significant interaction effect on the academic measure, with improved scores over time for controls that was not in evidence for either rugby group. Ten…	Physical Health and Function	Wellbeing	Neurological Health and Function
The neurocognitive consequences of sports-related concussion in sports people who have returned to play	Ryland	2013	UK	To investigate the impact of the severity and frequency of SRC on neurocognitive performance in university Rugby Union players.				71 university rugby union players	Amateur Male Rugby Union	Long-Term Outcomes		Severity and frequency of SRC in rugby players were associated with poorer performance in a memory and learning task. These results suggest that cognitive deficits persist following SRC although these are subtle, and restricted to executive function and learning and memory.	Physical Health and Function		Neurological Health and Function
The longevity of international rugby players	Beaglehole et al	1983	NZ	To determine the the longevity of international rugby players	The longevity of New Zealand international rugby players (All Blacks) is compared with the New Zealand male population to test the hypothesis that vigorous leisure time physical activity in the form of rugby in early adulthood is associated with an increased longevity. Data on 822 All Blacks since 1884 are compared with information from New Zealand life tables for males.				Elite Male Rugby Union	Mortality/Longevity		The life expectancy of All Blacks is the same as the general population although non-Maori All Blacks live almost ten years longer than Maori All Blacks.	Physical Health and Function		Longevity
An investigation into the longevity of Cambridge sportsmen	Rook	1954	UK	To determine the longevity of Cambridge University sportsmen	As controls, 761 men who were at the University at the same time were chosen and information was obtained about 710 of them. They were made up of a group of intellectuals numbering 374 men and a group of 336 men chosen at random.				Amateur Male Rugby Union	Longevity		There was no evidence that the sportsmen died at an earlier age than the group chosen at random; the intellectuals lived longer by a period averaging about 1.5 years, but this small difference might well be due to chance. There was some evidence that the prospects of longevity for the heavily built men was not so good as it was for those more lightly built. Of all the varsity sports however, thos…	Physical Health and Function		Longevity
Medical and health histories of Golden Oldies world rugby festival participants	Walsh et al	2011	Australia	To investigate the medical and health histories of participants (aged Football Science. 8, S1, 231. Table 1. Incidence of chronic disorders. 35+) of the 2010 Golden Oldies Rugby Festival (GORF) and compare these trends with Australian Bureau of Statistics data(4) to evaluate if any significant differences occur between a rugby specific population and general Australian population data	Online survey which investigated their medical/health histories	NA	NA	GORF participants (n=279, 35-78 years, X =51.2, +SD =8.4)	Amateur Male Rugby Union	Long-Term Outcomes		GORF participants presented with increased CV and metabolic risks, similar to that found in retired NFL players. Reduced rates of anxiety, arthritis, depression relative to Australian general population.	Physical Health and Function	Mental Health and Function	Multiple sub-themes
Health amongst former rugby union players: A cross-sectional study of morbidity and healthrelated quality of life	Davies et al	2017	UK	To assess morbidity and health-related quality of life (HrQoL) amongst former rugby players, compared to an age-standardised general population sample.	A cross-sectional study of former elite, male, rugby players (n= 259) was undertaken, and standardised morbidity ratios (SMR) calculated, assessing morbidity prevalence relative to English Longitudinal Study of Aging participants (ELSA, n= 5186). HrQoL, measured using the EQ-5D, was compared to a Health Survey for England (HSE, n= 2981) sample.	NA	NA	259 former elite, male, rugby players	Elite Male Rugby Union	Long-Term Outcomes		HrQoL, measured using the EQ-5D, was compared to a Health Survey for England (HSE, n= 2981) sample. In SMR analyses of participants aged 50+, diabetes was signifcantly lower amongstformer players, (0.28, 95% CI 0.11–0.66), whereas osteoarthritis (4.00, 95% CI 3.32–4.81), jointreplacement(6.02, 95% CI 4.66–7.77), osteoporosis (2.69, 95% CI 1.35–5.38), and anxiety (2.00, 95% CI 1.11–3.61) were sign…	Physical Health and Function	Wellbeing	Multiple sub-themes
Osteoarthritis is associated with symptoms of common mental disorders among former elite athletes	Schuring et al	2017	The Netherlands	To establish the association between osteoarthritis (OA) and the occurrence and comorbidity of symptoms of common mental disorders (CMD: distress, anxiety/depression, sleep disturbance, adverse alcohol use) in a group of former elite athletes (including rugby).	Cross-sectional analysis was performed on the baseline questionnaires from fve prospective cohort studies conducted between April 2014 and January 2016 in former elite athletes of rugby. The presence of OA (diagnosed by a medical professional) was examined with a single question and symptoms of CMD were evaluated through multiple validated questionnaires (4DSQ, GHQ-12, PROMIS, AUDIT-C).	NA	NA	295 former rugby players	Elite Male Rugby Union	Long-Term Outcomes		There was a signifcant association between OA and symptoms of distress, sleep disturbance and a comorbidity of symptoms of CMD in former rugby players	Physical Health and Function		Multiple sub-themes
Rugby Fans in Training New Zealand (RUFIT-NZ): a pilot randomized controlled trial of a healthy lifestyle program for overweight men delivered through professional rugby clubs in New Zealand	Maddison et al	2019	NZ	The aims of this research were to: 1) develop the RUFIT-NZ program to be delivered via professional rugby clubs; 2) explore the potential for RUFIT-NZ to help overweight or obese men lose weight and make healthy lifestyle changes by 12 weeks; and 3) evaluate the feasibility of conducting a definitive trial of the RUFIT-NZ program, as assessed by recruitment rates, participant retention, and parti…	To develop the intervention we reviewed content from the FFIT program and evidence-based physical activity, dietary and weight management guidelines, and undertook a series of focus groups and key informant interviews. We then evaluated the feasibility of the intervention in a two-arm, parallel, pilot randomized controlled trial in New Zealand. Ninety-six participants were randomized to either th…				Other	Physical Health		At 12 weeks the mean difference in body weight was 2.5 kg (95% CI -0.4 to 5.4), which favored the intervention. Statistically significant differences in favor of the intervention group were also observed for waist circumference, resting heart rate, diastolic blood pressure, cardiorespiratory fitness, and the proportion of participants that were adherent to 3 or more healthy lifestyle behaviors. T…	Physical Health and Function		Multiple sub-themes
The role of ‘Play Touch Rugby League’and self-paced interval running for improving men’s health	Dobbin	2015	UK	The aim of this study was to assess the impact of 4-weeks of Play Touch Rugby League (PTRL) and self-paced interval running (RUN) on several health markers within an active population.	Sixteen men were recruited into a PTRL (n = 8) or RUN (n = 8) group and completed four consecutive weeks of PTRL or RUN. Health markers (resting heart rate (RHR), systolic (SBP) and diastolic (DBP) blood pressure, body mass, fat mass (FM), percentage body fat (%BF), fat free mass (FFM), waist circumference (WC), hip circumference (HC), waist-to-hip ration (WHR), body mass index (BMI), stress and …				Amateur Male Rugby Union	Physical Health		The findings of the present study are in agreement with the literature, suggesting that participation in modified team sports such as PTRL is as, or more, effective than RUN for promoting positive changes in FM, FFM, %BF, SBP, RHR and potentially IL-6 concentration. Further, despite the PTRL group covering more high-intensity distance and achieving a higher peak velocity, sRPE was likely lowerwhe…	Physical Health and Function		Multiple sub-themes
The Epidemiology of Health and Morbidity Amongst Former Rugby Union Players	Davies et al	2017	UK	To determine the prevalence of self-reported physician-diagnosed morbidity amongst former elite rugby players, and compare this with an age and genderstandardised representative national population comparison	A cross-sectional questionnaire study was used. The English Longitudinal Study of Ageing (ELSA), a nationally representative study of English adults, was used as a control population. Age and gender matched standardised morbidity ratios (SMR) were calculated against the ELSA reference population. A post-hoc sensitivity analysis examined morbidity differences between the complete cohort of former …				Elite Male Rugby Union	Long-Term Outcomes		Amongst gender-matched rugby (n=259) and ELSA (n=5186) participants aged 50 and over, diabetes was significantly lower amongst former players (SMR 0.28, CI 0.11 to 0.66), whereas osteoporosis (SMR 2.69, CI 1.35 to 5.38) and osteoarthritis (SMR 4.00) were significantly increased amongst former players. In unadjusted, complete cohort sensitivity analyses, hypertension and heart problems were also d…	Physical Health and Function		Multiple sub-themes
Improved metabolic and cardiorespiratory fitness during a recreational training program in obese children	Calcaterra et al	2013	Italy	To examine the effect of a recreational training program in obese children	We studied a recreational 12-week controlled training program for sedentary obese children, including interactive video games. We enrolled 22 obese subjects (13.23 ± 1.76 years) in an exercise program, implemented twice a week for a 12-week period. The program consisted of a combination of circuit-based aerobics, strength and resistance exercises; specifically soccer, rugby, volleyball and basket…				Other	Physical Health		During the 12-week training program there was a significant decrease in body mass index (BMI) (p = 0.002), SDS-BMI (p = 0.003), waist circumference (p = 0.004), waist circumference/height ratio (p = 0.001), % fat mass (p = 0.001), blood glucose (p = 0.001), homeostasis model assessment for insulin resistance (HOMA-IR) (p = 0.04), triglycerides (p = 0.03) and systolic pressure (p = 0.04) before an…	Physical Health and Function		Multiple sub-themes
Small-sided games training reduces CRP, IL-6 and leptin in sedentary, middle-aged men	Mendham et al	2014	Australia	The aim of the present study was to assess the training-induced changes in pro- and anti-inflammatory cytokines, aerobic capacity and body composition in response to 8 weeks of SSG, stationary cycling (CYC) or control (CON) conditions.	Thirty-three middle-aged, sedentary men were randomized into CYC (n = 11), SSG (n = 11), or CON (n = 11) conditions. The CYC and SSG conditions trained 3 days/week for 8 weeks, whilst CON maintained habitual activity and dietary patterns. Pre- and post-intervention testing included a dual-energy X-ray absorptiometry scan, sub-maximal (80 % maximal heart rate) aerobic capacity (VO2) and fasting ve…				Male Touch Rugby	Physical Health		Cycling and SSG training were both effective at improving CRP, VO2 and TB-FM. Furthermore, SSG training has also shown to be an effective training approach in reducing IL-6 and leptin and increasing muscle mass within sedentary, middle-aged men.	Physical Health and Function		Multiple sub-themes
Physiological and Pathology Demographics of Veteran Rugby Athletes: Golden Oldies Rugby Festival	Climstein et al	2011	Australia	To investigate the demographics of veteran rugby players.	A cross-sectional, observational study was completed using an online web-based questionnaire that consisted of medical history and physiological measures. Data analysis was completed using a one sample t-test (<50yrs versus >50yrs) and Chi-square test. A total of 216 veteran rugby competitors (response rate = 6.8%) representing 10 countries, aged 35-72 yrs (mean 51.2, S.D. ±8.0), participated in …				Amateur Male Rugby Union	Physical Health		Resting blood pressures, lipid profile and glycaemia did not differ significantly between cohorts yet the younger group did not continually demonstrate the highest percentage of optimal readings. This suggests that participation in rugby in advanced age may offer reduced but not eliminated cardiovascular or cardiometabolic risk. Arguably, the younger cohort reported a higher incidence of most chr…	Physical Health and Function		Multiple sub-themes
Investigating emotional and behavioural sequelae and concussive injury in a sample of adult rugby players in Cape Town, South Africa	Wepener et al	2017	South Africa	To explore the relationship between concussion and emotional and behavioural disturbance in rugby players and non-contact sportsmen	Questionnaires measuring depression, anxiety, general health, anger, impulsivity and alcohol usage	NA	NA	114 participants including rugby players (n = 88) and non-contact sport participants (n = 26), matched on age and intelligence	Amateur Male Rugby Union	Long-Term Outcomes		Results indicated that the groups (rugby players with concussion, rugby players without concussion and non-contact sport control participants) did not differ on emotional and behavioural disturbance and that discriminant functions could not be used to significantly predict group membership	Mental Health and Function		Mental Health and Function
Association among practice frequency on depression and stress among competitive US male wheelchair rugby athletes with tetraplegia	Silveira et al	2017	USA	To determine whether frequency of training is related to self-reported lower psychological distress, defined as depressivesymptomology and perceived stress, among the US male wheelchair rugby athletes with tetraplegia	Survey data were collected on a convenience sample at wheelchair rugby tournaments from January–April 2016.Participants self-reported depressive symptomology (CES-D-10), perceived stress scale (PSS), and frequency of rugby practice.Covariate-adjusted regression models were conducted among the full sample and a subsample of individuals who reported spinal cordinjury (SCI) as the nature of their di…			150 males with tetraplegia	Wheelchair Rugby	Mental Health		esults of the main analyses indicated that practicing wheelchair rugby two times or more (compared to once a week or less) wassignificantly associated with lower depressive symptomology and perceived stress among the full sample and subsample of individualswith SCI. Greater frequency of wheelchair rugby participation was associated with lower levels of psychological distress.	Mental Health and Function		Mental Health and Function
The relationship between psychological wellbeing and health-related physical fitness in professional rugby players	Payne	2016	South Africa	The present study aimed to provide insight into the health of professional rugby players by investigating two components of health, namely psychological and physical wellbeing and the relationship between these facets.	Psychological wellbeing (PW) was measured by the State Trait Personality Inventory (form Y) (STPI-Y) and the Sport Competitive Anxiety Test (adult form) (SCAT-A). Physical wellbeing was defined as health-related physical fitness (HRPF). HRPF was assessed by measurements of the rugby players' body composition, physical fitness, and heart health. Pearson's correlation co-efficient was calculated be…	NA	NA	Two hundred and thirty-eight (238) professional male rugby union players, situated at the Investec Rugby Academy participated in the study	Elite Male Rugby Union	Wellbeing		It is suggested that professional rugby players do not experience optimal psychological wellbeing as they experience negative emotions at a rate and intensity slightly above average. However, it is suggested that they also have highlevels of curiosity, which indicates that they do not suffer from poor PW in totality. This suggests that they might be in a state of overtraining or experiencing over…	Mental Health and Function		Mental Health and Function
The acute effects of participation in sport on mood: The importance of level of "antagonistic physical interaction."	Kerr et al	1994	The Netherlands	To determine the acute effects of participation in sport on mood	109 male university students performed sports with a low (easy running in small groups), medium (basketball), or high (rugby) level of antagonistic physical interaction (API). The Stress-Arousal Checklist (SACL) and the Tension and Effort Stress Inventory (TESI) were completed pre- and postsport sessions.				Amateur Male Rugby Union	Mental Health		Self-reported arousal increased in all conditions. SACL stress scores increased with high level API. Mean positive mood scores for all conditions were approximately double those for unpleasant mood scores. There was an overall decrease in pleasant moods pre- to postsport activity. Unpleasant mood scores decreased with low API, remained unchanged with medium API, and increased with high API. High …	Mental Health and Function		Mental Health and Function
Prevalence and determinants of symptoms of common mental disorders in retired professional Rugby Union players	Gouttebarge et al	2016	The Netherlands	The primary aim of this study was to determine the prevalence of symptoms of common mental disorders (CMD) (distress, anxiety/depression, sleeping disturbance, adverse nutrition behaviour, adverse alcohol behaviour and smoking) among retired professional Rugby Union players. The secondary aim was to explore the associations between stressors (life events, Rugby Union career dissatisfaction) and t…	Therefore, cross-sectional analyses were conducted on baseline questionnaires from an ongoing prospective cohort study of retired professional Rugby Union players. An electronic questionnaire was established using validated questionnaires to assess symptoms of CMD and stressors. The electronic questionnaire was subsequently distributed to 295 retired players by the national Rugby Union players’ a…				Elite Male Rugby Union	Long-Term Outcomes		Prevalence of symptoms of CMD among retired professional Rugby Union player ranged from 15% for smoking and 25% for distress to 62% for adverse nutrition behaviour. There were significant associations between a higher number of life events and distress, anxiety/depression, sleeping disturbance and adverse nutrition behaviour, and also for a higher level of Rugby Union career dissatisfaction and d…	Mental Health and Function		Mental Health and Function
Symptoms Of Common Mental Disorders In Professional Rugby: An International Observational Descriptive Study	Gouttebarge et al	2017	The Netherlands	The aim of the study was to determine the prevalence of symp-toms of common mental disorders among professional rugby players across countries.	A cross-sectional analysis of the base-line questionnaires from an ongoing prospective cohort study was conducted. Nine national players’ associations and three rugby unions distributed questionnaires based on validated scales for assessing symptoms of common mental disorders.				Elite Male Rugby Union	Mental Health		Prevalence (4-week) of symptoms of CMD ranged from 13 % for sleep disturbance to 30 % for anxiety/depression, while around 17 % of the participants reported a comorbidity of two simultaneous symptoms of CMD. Although age- and gender-matched data from the community are difficult to compare with the current sample, this study indicates that professional rugby players may have rates of CMD symptoms …	Mental Health and Function		Mental Health and Function
A 12-month prospective cohort study of symptoms of common mental disorders among professional rugby players	Gouttebarge et al	2018	The Netherlands	The primary aims were to determine the 12-month incidence (and comorbidity) of symptoms of common mental disorders (CMD) among male professional rugby players and to explore their association with potential stressors. A secondary aim was to explore the view of male professional rugby players about the consequences of symptoms of CMD and related medical support/needs.	An observational prospective cohort study with three measurements over a 12-month period was conducted among male professional rugby players from several countries.				Elite Male Rugby Union	Mental Health		A total of 595 players (mean age of 26 years; mean career duration of 6 years) were enrolled, of which 333 completed the follow-up period. The incidence of symptoms of CMD were: 11% for distress, 28% for anxiety/depression, 12% for sleep disturbance, 11% for eating disorders and 22% for adverse alcohol use (13% for two simultaneous symptoms of CMD).	Mental Health and Function		Mental Health and Function
A history of concussions is associated with symptoms of common mental disorders in former male professional athletes across a range of sports	Gouttebarge et al	2017	The Netherlands	The primary aim of this study was to explore the relationship between sports career-related concussions and the subsequent occurrence of symptoms of CMD among former male professional athletes retired from football (soccer), ice hockey and rugby (union).	Cross-sectional analyses were performed on baseline electronic questionnaires from three prospective cohort studies among former male professional athletes retired from football (soccer), ice hockey and rugby (union). The number of confirmed concussions was examined through a single question, while symptoms of distress, anxiety and depression, sleep disturbance and adverse alcohol use were assess…				Elite Male Rugby Union	Long-Term Outcomes		During the first 10 years after their retirement from contact team sports, former professional athletes retired from football, ice hockey, and rugby are 7–11% more likely to report symptoms of common mental disorders (CMD) by every additional sports career-related concussion. Former professional athletes reporting a history of four or five sports career-related concussions are nearly 1.5 times mo…	Mental Health and Function		Mental Health and Function
Measurement of cognitive and somatic anxiety amongst first team high school rugby players	Coetzee et al	2014	South Africa	To determine to what extent the important rugby match alters the cognitive and somatic anxiety experienced by high school rugby players	In order to realize these aims, high school rugby players were compared to male adolescents who were not participating in any type of sport. A purposeful sample of 10 first team high school rugby players and 10 male adolescents not participating in any type of sport was drawn from a high school situated in the Gauteng Province of South Africa. Cognitive anxiety was measured through the administra…				Youth Male Rugby Union	Mental Health		The results indicate that the first team high school rugby players experienced cognitive but not somatic anxiety. The experience of cognitive anxiety might be explained by rugby players‘ participation in an important rugby match.	Mental Health and Function		Mental Health and Function
What position do you play? Eating disorder pathology among rugby players, and the understudied role of player position	Compte et al	2018	Argentina	We aimed to investigate whether ED pathology varied as a function of player position	A cross-sectional study was conducted among 203 rugby players (Mage = 21.78, SD = 3.54) in order assess associations between elevated eating pathology given the players' position, and with ED mediating mechanisms (physical comparison and exercise dependence).				Amateur Male Rugby Union	Physical Health		8.9% (95% CI: 4.9, 12.8) of the participants presented elevated eating pathology. Players' position, physical comparison and exercise dependence were associated with elevated eating pathology. Forwards tended to endorse binge eating more frequently, and showed higher levels of eating concerns. 9% of the rugby players in this study showed high levels of eating pathology, which far exceeds the popu…	Mental Health and Function		Mental Health and Function
Reflections on implementing the Active Choices Rugby Programme to enhance mental health and well-being of young men in prison	Woods et al	2019	NA	To assess whether previous reported benefits in wellbeing could be achieved within a young men's prison, and if present, whether this could be potentially attributed to supporting conditions within the sporting intervention related to basic psychological needs theory	14 men participated in the research, from a young men's prison within the United Kingdom. Intervention was a six-week intervention of skill-based rugby sessions. Assessments at start of programme, then at 3/6/8 weeks				Amateur Male Rugby Union	Mental Health		The Active Choices Rugby Proframme for prisoners led to a reported benefit on short-term hedonic mental wellbeing, through increased positive affect and reduced stress and anger (though overall results did not evidence lasting benefits). Quantitative results did not reveal any substantial change in participant satisfaction of basic psychological needs within daily prison environment. This demonst…	Mental Health and Function	Wellbeing	Mental Health and Function
Quality of Life of Wheelchair Rugby Players	Zelenka et al	2017	Czech Republic	Show the effect of sport participation in wheelchair rugby on QOL of persons with spinal cord injury.	The WHOQOL-BREF instrument comprises of 26 items, which measure the following four domains: a) physical health (DOM 1), b) psychological health (DOM 2), c) social relationships (DOM 3), and d) environment (DOM 4).	NA	NA	Twenty male wheelchair rugby players – athletes with tetraplegia, who are engaged in regular organized physical activity – wheelchair rugby training and competition (mean age = 32.50, SD = 8.46). Sixteen persons with tetraplegia (all males) who were not actively engaged in sports – not participating in an organized physical activity (mean age = 39.44, SD = 7.44).	Wheelchair Rugby	Wellbeing		The greatest perceived benefits resulting from sport participation were found in domain Physical health. In the agreement with Dixon-Ibarra and Driver (2013), sport participation seems to increase functional independency and improvement in activities of daily living, there is a better mobility and work capacity and much lesser dependency on medical support and better sleep and rest, which can res…	Wellbeing		Wheelchair Rugby
Sports activities and satisfaction of living of menin wheelchair rugby players after cervical spinal cord injury (SCI)	Zwierzchowska et al	2016	Poland	Aim of the current review was to systematically review the available evidence on the epidemiology of time-loss injuries in senior amateur male rugby union players	Questionnaire of life satisfaction LiSat-9	NA	NA	37 males	Wheelchair Rugby	Wellbeing		The level of the life satisfaction wheelchair rugby players is varied due to their age, time since injury and age at injury. Successes in sport significantly affect the level of their life satisfaction.	Wellbeing		Wheelchair Rugby
Wheelchair Rugby Participation as a Path to Independence	Silveira et al	2019	USA	To determine whether the number of years post-injury and years of wheelchair rugby participation impact independence in activities of daily living (ADLs) following spinal cord injury	A cross-sectional study was conducted with 130 wheelchair rugby athletes. Covariate-adjusted OLS regression models were conducted predicting independence as a factor of years post-injury and years spent participating in wheelchair rugby	NA	NA	130 wheelchair rugby athletes	Wheelchair Rugby	Wellbeing		Years playing wheelchair rugby is significantly related to independence among athletes regardless of years post-injury. Encouraging individuals with tetraplegia to participate in wheelchair rugby during rehabilitation may assist with regaining independence.	Wellbeing		Wheelchair Rugby
Psychological impact of wheelchair rugby and differences between American and Japanese players.	Nagata et al	2017	USA	This study investigated the impact of wheelchair rugby participation on three psychological variables	Electronic survey designed to allow for both post-hoc and retrospective pretest measurements.	NA	NA	A total of 84 wheelchair rugby players (58 Americans and 26 Japanese)	Wheelchair Rugby	Mental Health		The results of repeated measures ANOVA indicated a positive effects of wheelchair rugby participation on life satisfaction, self-esteem, and athletic identity	Wellbeing		Wheelchair Rugby
Personal Meaning of Wheelchair Rugby Participation by Five Male Athletes	Litchke et al	2012	USA	To explore the meaning of wheelchair rugby participation as expressed by five athletes	Semi-structured interview & field observation	Field observations were performed at 10 weekend WR practices for a total of 40 hours. Individually, and as group, all five athletes were observed for an additional 8 to 10 hours in informal social settings after practices or on a separate weekend. Observations were also made at one local tournament for 13 hours and one national tournament for 30 hours.	NA	Five male WR athletes with tetraplegia were purposefully selected from two nationally competitive teams		Wellbeing		Themes emerged from their stories about perceived positive outcomes in physical health, psychosocial well-being, expression of an athlete identity, and hold meaning related to playing a full contact sport. The study findings demonstrate the importance and value of sport participation for persons with tetraplegia. These findings support the use of adapted sport as an impactful intervention when wo…	Wellbeing		Wheelchair Rugby
Rugby and physical fitness of people with tetraplegia	Lewandowski et al	2013	Poland	The aim of this paper was to evaluate the influence of practicing rugby on selected components of physical fitness in people with damage to their spinal cord in the cervical segment	The study included 45 young men with tetraplegia, who use an active wheelchair on the everyday basis. An adaptation of Cooper test was used together with an author's questionnaire. The studied group was differentiated according to the period of time of taking part in the sport training or lack thereof.				Wheelchair Rugby	Physical Health		Significant differences in test results were established between subjects practicing rugby for a longer period of time and the characteristics of other groups. It was observed that subjects who did not play rugby were characterized by significantly less favorable results of a trial indirectly reflecting the level of endurance and strength. Study results confirmed a positive influence of attending…	Wellbeing		Wheelchair Rugby
The psychological influences on participation in Wheelchair Rugby: a social relational model of disability	Haslett et al	2017	Ireland	The aim of this study is to interpret influences on participation in disability sport through the conceptual lens of the social relational model (SRM) of disability	Ten Irish adult male athletes with physical disabilities participated in semi-structured interviews exploring the barriers and facilitators that influence participation in Wheelchair Rugby.				Wheelchair Rugby	Wellbeing		Facilitators come in the form of psychological well-being, such as increased autonomy through involvement in Wheelchair Rugby or the influence of the rugby wheelchair on confidence.	Wellbeing		Wheelchair Rugby
Its okay to be a quad: wheelchair rugby players sense of community	Goodwin et al	2009	Canada	To explore the social experience of wheelchair rugby from the perspective of the players.	Eleven national level rugby players (10 males, 1 female with a mean age of 33 years) shared their experiences through the phenomenological methods of semistructured focus group interviews and artifacts				Wheelchair Rugby	Wellbeing		Wheelchair rugby contributed to the athletes’ sense of belonging, a reciprocal sense of influence on their sport, an association with a group that was personally rewarding, and an emotional connection with the sport. The defining element of any community is its psychological health (Obst & White, 2005). The wheelchair rugby community depicted by the athletes of this study was very healthy	Wellbeing		Wheelchair Rugby
Influence of long-term wheelchair rugby training on the functional abilities in persons with tetraplegia over a two-year post-spinal cord injury	Furmaniuk et al	2010	Poland	The aim of this study was to assess the influence of long-term wheelchair rugby training on the functional abilities of persons with tetraplegia over a 2-year period post-spinal cord injury.	Participants: Forty people with incomplete tetraplegia were examined. Participants were divided into 2 groups: a wheelchair rugby training group (n = 20) and a control group (n = 20). Methods: The Wheelchair Skills Test was used to assess functional changes in patients. In order to assess the strength of the 10 key muscles in the upper limb, the American Spinal Injury Association (ASIA) motor sco…				Wheelchair Rugby	Wellbeing		Participation in regular wheelchair rugby training may preserve and augment functional abilities in individuals with incomplete tetraplegia.	Wellbeing		Wheelchair Rugby
Motivational participation incentives of elite quadriplegic rugby athletes	Ferr	1993	USA	The purpose of this thesis was to gain an understanding of the primary motivational factors that influence participation in sport activities by quadriplegic athletes	Subjects were 74 wheelchair athletes competing in the USQRA Quad Rugby Nationals, April 2-5, 1992, at San Jose State University. The subjects were adult males (n = 68) and adult females (n = 6) ranging in age from 19 to 50 years. Subjects completed a 26-item Likert-type questionnaire developed to investigate the select motivation factors that influence their sports involvement in Quad Rugby.				Wheelchair Rugby	Wellbeing		The personal sense of fulfillment, pleasure, and gratification dervied from the experience, and not the tangible rewards and prizes, is a primary motivational incentive for participation in quad rugby. It could be inferred that quad rugby is an enjoyable means of exercising, improving overall fitness, and controlling weight.	Wellbeing		Wheelchair Rugby
How does playing adapted sports affect quality of life of people with mobility limitations? Results from a mixed-method sequential explanatory study	Cote-Leclerc et al	2017	Canada	This study thus aimed to explore the influence of adapted sports on quality of life in adult wheelchair users.	A mixed-method sequential explanatory design was used, including a quantitative and a qualitative component with a clinical research design. A total of 34 wheelchair users aged 18 to 62, who regularly played adapted sports, completed the Quality of Life Index (/30). Their scores were compared to those obtained by people of similar age without limitations (general population). Ten of the wheelchai…				Wheelchair Rugby	Wellbeing		The results of this study show that the quality of life of people with mobility limitations who play adapted sports is similar to that of the general population, except for family-related quality of life. This similarity may be attributable to the positive impact of adapted sport on personal factors and social participation. Participation in adapted sports was identified as having positive effect…	Wellbeing		Wheelchair Rugby
Self-efficacy for quad rugby skills andactivities of daily living	Adnan et al	2001	NZ	The purpose was to compare quad rugby male athletes with a lesion-matched group of persons without quad rugby experience on self-efficacy expectations for performing quad rugby skills (SEQRS) and activities of daily living (SEADL) skills	Each group contained 15 participants. The experimental design was ex post facto.				Wheelchair Rugby	Wellbeing		Mann-Whitney U Tests revealed that quad rugby participants scored significantly higher on all 11 items comprising the SEQRS and 4 of the 28 items comprising SEADL	Wellbeing		Wheelchair Rugby
Academic achievement in early adolescent rugby players with multiple concussions: A retrospective analysis	Kriel	2012	South Africa	The aim of this study was to determine whether there were differences in academic achievement over time within and between groups of adolescents that had either played rugby and sustained multiple concussions (RC-group; n = 17), or had not played rugby nor sustained any concussions (NRC-group; n = 13).	A retrospective analysis of matched, controlled, prospective, longitudinal data was conducted, using data from Alexander (2009) that investigated the groups‟ neuropsychological performance from gr. 6 to gr. 9. The present study added their gr. 12 academic aggregate scores to the data. Participants were matched on critical attributes, such as age, socio-economic status, gender and general IQ. Data…				Youth Male Rugby Union	Other	Academic Achievement	There is no conclusive evidence that adolescent rugby players perform statistically worse in their academic achievement when measured over a six-year period, the slight decrease in academic results, seen as a downward trend, suggests that rugby players who have sustained multiple concussions might not develop the same complex higher-ordercognitive functions as their non-rugby playing, non-concuss…	Wellbeing		Other
Why American Women Play Rugby	Fields et al	2008	USA	This study examines why US women play rugby given the social stigma surrounding women's participation in sports in general, particularly contact sports, and despite the high risk of injury.	In a survey of their injury history and potential injury risk factors, 339 female rugby players from 14 teams of varied quality and levels of play from a wide geographic area in the United States were asked why they played the sport.				Other	Wellbeing		Their responses indicate that women play rugby because they enjoy the game, they like the aggressive aspects of the sport, they appreciate the social aspects of the game, and they believe the sport provides them with positive benefits, such as increased fitness, confidence, and strength. The results of this study indicate that many women are willing to risk injury for the positive rewards that th…	Wellbeing		Other
School sport and academic achievement	Bradley et al	2013	Ireland	The study will investigate how the particular sport chosen by students participating in school sport during their Leaving Certificate years influences their Leaving Certificate results.	We recorded the Leaving Certificate scores and sports participation from 402 boys graduating from a secondary school in the Ireland during 2008‐2011. Sports participation was assigned 1 of 4 categories: rugby, rowing, soccer, and no sport				Youth Male Rugby Union	Other (please add to emergent themes)	Academic Performance	Participation in sports during the Leaving Certificate years conferred a 25.4‐point benefit to the final Leaving Certificate score. Promoting participation in school sport and providing access to a range of team and individual sports throughout the secondary school years may be a beneficial way to improve students' Leaving Certificate results.	Wellbeing		Other
Old bodies, young hearts: A qualitative exploration of the engagement of older male amateur rugby union players in Taiwan	Cheng et al	2016	Taiwan	To explore why older players have sought to facilitate their continued involvement in an activity that is normally played as a full-contact sport including 1) Why these individuals continue to play, how they perceive their experience and how the sport has evolved to maintain their interest and active involvement	Study participants were specifically chosen from an established Taiwanese rugby union club. Semi-structured qualitative interviews were conducted in 2013 with 15 amateur rugby players aged from 54 to 83 years.				Amateur Male Rugby Union	Wellbeing		Results indicated that the main motivations for participants to continue playing was that it gave them ‘a sense of nostalgia and pride’, ‘lifelong friendship and belonging’, ‘pure joy and passion’, with considerations of being ‘mentally and physically active’, keeping up an involvement in ‘a real man’s sport’ and maintaining a sense of one’s ‘self-identity’ with ‘responsibility and commitment’ to…	Wellbeing		Other
Rugby union among middle-aged American men: An exploration	Dong et al	2013	USA	The purpose of this study is to examine the motivations and participation effects of middle-aged American men participating in rugby in the USA	Data were collected through in-depth interviews during an international amateur masters’ tournament. A total of 14 amateur rugby players with ages ranging from 35 to 52 were interviewed				Amateur Male Rugby Union	Wellbeing		This study found that the motivations for rugby participation were making friends, the love of rugby and self-actualisation.	Wellbeing		Other
Alcohol consumption, athlete identity, and happiness among student sportspeople as a function of sport-type	Zhou et al	2015	UK	To examine the differences in alcohol consumption and psychosocial antecedents between	Questionnaires measured alcohol consumption, athlete identity and subjective happinessfrom a sample of UK university sportspeople	NA	NA	N= 1785; male = 1048	Other	Wellbeing		Team sports players reported significantly greater rates alco-hol consumption, as well as scoring higher than individual sportsplayers on measures of athlete identity and happiness.	Wellbeing		Other
Influence of rugby injuries on players' subsequent health and lifestyle: beginning a long term follow up	Lee et al	2001	UK	To describe the current rugbyplaying status of a cohort of 1169 men whohad previously participated in an epide-miological survey of rugby injuries duringthe 1993–1994 season, and assess theconsequences of rugby injuries sustained.	In May 1998, 911 (78%) mencompleted a questionnaire reporting theircurrent involvement in rugby and theinfluence that the 324 (71%) injuries theyhad sustained four years earlier had sincehad on their health and wellbeing				Amateur Male Rugby Union	Long-Term Outcomes		The most common reasonsgiven by the 390 (43%) ex-players for ceas-ing to play rugby were family (10%),employment (25%), and an injury sus-tained while playing rugby (26%), 80% ofwhich were dislocations, strains, andsprains, mainly to the knee (35%), back(14%), and shoulder (9%). A significantly( ̃2test 21.7, df = 1, p<0.001) higherproportion of current players (90%) un-dertook (non-rugby) sportin…	Wellbeing		Other
Academic consequences of very mild and mild traumatic brain injuries in secondary school rugby players	Laubscher et al	2010	South Africa	The aim of this study was to compare the last two years academic performances of secondary school rugby players suffering very mild (vMTBI), and mild traumatic brain injuries (MTBI) with sedentary control group	A cohort of 35 secondary school male rugby players (divided into a sub-concussive (vMTBI) group (group 1) (n=26) and a concussive (MTBI) group (group 2) (n=9) at the end of a secondary school rugby season and ten (n=10) participants that were not involved in contact sport (control group 3), were used. The academic results of the participants in the subjects Afrikaans, English, Mathematics and Sci…				Youth Male Rugby Union	Wellbeing		Group 1 (vMTBI group) and group 2 (MTBI group) showed a statistically significant (p≤0.05) decrease in academic performance in Afrikaans when compared between year 1 and year 2, (group 1, p=0.017; group 2, p=0.016).	Wellbeing		Other
The neuropsychological and academic consequences of repeated mild and very mild traumatic brain injuries in rugby at a secondary school	Laubscher	2006	South Africa	The objectives of this study were to determine the incidence, the neuropsychological consequences and the effect on the academic performance of repeated mild (MTBI) and very mild traumatic brain injuries (vMTBI) in a secondary school rugby team during one playing season	A cohort of 35 secondary school male rugby players divided into a vMTBI (group 1) (n=26) and a MTBI (group 2) (n=9) from a local secondary school's first and second team, was followed for a full competitive season by a trained Biokineticist, who was present at all the games and contact sessions played. All vMTBI and MTBI and the severity of these injuries were documented. A control (group 3) that…				Youth Male Rugby Union	Wellbeing		The findings of this study indicate a high incidence of vMTBI in a cohort of secondary school rugby players in one season, a statistically significant reduction (p=O.O1 )in delayed memory of the vMTBI rugby players and a statistically significant decrease in academic performance p=O.O17 (group 1) and p=O.O16 (group 2) in the subject Afrikaans from year 1 to year 2 final examinations.	Wellbeing		Other
The Incidence of Injury in Amateur Male Rugby Union: A Systematic Review and Meta-Analysis	Yeomans et al	2018	Ireland	Aim of the current review was to systematically review the available evidence on the epidemiology of time-loss injuries in senior amateur male rugby union players	Systematic Review & Meta-Analysis	NA	NA	6 studies	Amateur Male Rugby Union	Injuries		The overall incidence rate of match injuries within senior amateur rugby union players was 46.8/1000 player hours [95% confidence interval (CI) 34.4-59.2]. Contact events accounted for the majority of injuries, with the tackler more at risk than the player being tackled, and with respective incidence rates of 15.9/1000 player hours (95% CI 12.4-19.5) and 12.2/1000 player hours (95% CI 9.3-15.1).	Acute Health Issues		Injuries
A meta-analysis of injuries in senior men's professional Rugby Union	Williams et al	2013	UK	To assess morbidity and health-related quality of life (HrQoL) amongst former rugby players, compared to an age-standardised general population sample.	Meta-Analysis	NA	NA	Fifteen papers addressing injuries in senior men's professional Rugby Union (from 1995 through September 2012) were included in the review	Elite Male Rugby Union	Injuries		The overall incidence of injuries in senior men's professional Rugby Union matches was 81 per 1,000 player hours (95 % CI 63-105), and 3 per 1,000 player hours (95 % CI 2-4) during training. Estimated mean severity for match injuries was 20 days (95 % CI 14-27), and 22 days (95 % CI 19-24) for training injuries. A higher level of play was associated with a greater incidence of injuries in matches…	Acute Health Issues		Injuries
Incidence and severity of neck injury in Rugby Union: a systematic review	Swain et al	2011	Australia	1) To collate and appraise incidence and severity data for neck injury in Rugby Union 2) To report risk factors for neck injuryin Rugby Union that are supported by incidence and severity data	Systematic Review	NA	NA	33 articles met criteria	Other	Injuries		Meaningful understandingof neck injury incidence and severity in RU is restricted tobut a few studies which adopt a comparable methodologicalconstruct.Neck injury incidence ranged from 0.26 (CI: 0.08, 0.93)to 9.17 (CI: 1.89, 26.81)/1000 player hours for mixed RUpopulations that adopted anall inclusivesports injury defi-nition. There is a paucity of both neck injury severity dataand analytical dat…	Acute Health Issues		Injuries
Epidemiology of ankle and foot overuse injuries in sports: A systematic review	Sobhanie et al	2013	The Netherlands	To analyze the methodology of published studies regarding ankle and foot overuse injuries in different sports disciplines and to summarize epidemiological data of ankle and foot overuse injuries.	Systematic Review	NA	NA	A total of 89 articles on 23 sports disciplines were included in this review	Other	Injuries		The highest incidence of foot & ankle injuries, expressed per 1000 athlete per hour exposure, were reported for soccer, 2.7 (95% CI: 0.7–6.9); and rugby, 1.3 (95% CI: 0.8–1.9 game)	Acute Health Issues		Injuries
Rugby and Shoulder Trauma: A Systematic Review	Papalia et al	2015	Italy	To systematically review the available studies concerning shoulder injury in rugby players. The main focus is represented by incidence and percentage of different kind of lesions affecting the shoulder joint	Systematic Review	NA	NA	22 studies included	Other	Injuries		Bankart lesions, SLAP, dislocation and rotator cuff tears (resulting in acute or chronic instability) are the main lesions occurring during the games. Generally, tackle is the main injury-related event	Acute Health Issues		Injuries
Prevalence of laceration injuries in professional and amateur rugby union: a systematic review and meta-analysis	Oudshoorn et al	2017	UK	To summarise the skin and laceration injury prevalence in published epidemiological studies and to investigate any differences in skin injury risk between amateur and professional players.	Systematic Review & Meta-Analysis	NA	NA	Out of these selected studies, 10 studies measured professional athletes and 2 studies observed injuries in an amateur cohort. Eleven out of 12 studies included a completely male cohort, 1 study observed injuries of both males and female rugby players	Other	Injuries		Skin injuries account for 5.1% of match injuries and 1.5% of training injuries in rugby union. Amateur players are more likely to sustain a laceration injury during training sessions than professional players.	Acute Health Issues		Injuries
Acute and chronic musculoskeletal injury in Para sport: A systematic review	Ottesen et al	2018	USA	To describe the musculoskeletal (MSK) injury epidemiology of elite and recreational Para athletes and highlight current research gaps	Systematic Review	NA	NA	50 full text articles reviewed	Wheelchair Rugby	Injuries		Seated Para athletes sustain upper limb injuries more commonly. Male and female summer Paralympic athletes typically have similar overall injury rates and Football 5-a-Side, Parapowerlifting, Goalball, Wheelchair fencing and Wheelchair rugby are consistently highest-risk sports	Acute Health Issues		Injuries
Men at higher risk of groin injuries in elite team sports: a systematic review	Orchard	2005	Australia	To record incidence of groin and groin region injuries in sports	Systematic Review	NA	NA	31 studies	Elite Male Rugby Union	Injuries		Australian football had a higher rate of groin injuries than rugby league and rugby union. In rugby union, backs (who do more running and kicking) have higher rates of groin injury than forwards (who do more tackling and other body contact). Adductor muscle injuries: Backs 3.1/1000 player hours ; Forwards 2.0/1000 player hours.	Acute Health Issues		Injuries
Catastrophic Cervical Spine Injuries in Contact Sports	Hutton et al	2016	UK	To determine the incidence of catastrophic cervical spine injuries (CCSIs) among elite athletes participating in contact team sports and whether the incidence varies depending on the use of protective gear or by player position.	Systematic Review	NA	NA	10 studies that investigated the risk of CCSI in rugby	Other	Injuries		Mixed populations of elite and recreational rugby players in four studies report a CCSI rate of 1.4 to 7.2 per 100,000 player-years. In this same population, the scrum accounted for 30 to 51% of total reported CCSIs in Rugby Union versus 0 to 4% in Rugby League. The tackle accounted for 29 to 39% of injuries in Rugby Union	Acute Health Issues		Injuries
Systematic review of rugby injuries in children and adolescents under 21 years	Freitag et al	2015	UK	To calculate probabilities of match injury for a player over a season and a pooled estimate of match injury incidence where studies were sufficiently similar	Systematic Review	NA	NA	26 studies on rugby union in final review, two combining union and league, four did not specify	Other	Injuries		The probability of a player being injured over a season ranged from 6% to 90% for rugby union and 68% to 96% for rugby league. The pooled injury incidence estimate for rugby union was 26.7/1000 player-hours for injuries irrespective of need for medical attention or time-loss and 10.3/1000 player-hours for injuries requiring at least 7 days absence from games; equivalent to a 28.4% and 12.1% risk …	Acute Health Issues		Injuries
A systematic review on ankle injury and ankle sprain in sports	Fong et al	2007	China	To systematically review epidemiological studies on sports injury from 1977 to 2005 in which ankle injury was included.	Systematic Review	NA	NA	9 studies on rugby union	Other	Injuries		The incidence of ankle injury and ankle sprain was high in court games and team sports, such as rugby, soccer, volleyball, handball and basketball.	Acute Health Issues		Injuries
Epidemiology of injuries in senior male rugby union sevens: a systematic review	Cruz-Ferreira et al	2017	Portugal	The aim of this study was to systematically review available data regarding the epidemiology of injuries in senior male rugby sevens.	Systematic Review	NA	NA	Seven prospective cohort original articles addressing injuries in senior male rugby sevens players were included in this review	Elite Male 7s	Injuries		Injury incidence rates in rugby sevens are higher than those reported for the 15-a-side variant, at the same level of competition. Injuries are also more severe, resulting in longer absence periods. This might result from the fact that rugby sevens is played with greater speed, leading to an increase in energy transfers during tackles, more running and turning manoeuvers, that can possibly cause …	Acute Health Issues		Injuries
Epidemiology of sport-related spinal cord injuries: A systematic review	Chan et al	2016	Canada	This paper aims to give a systematic overview of the epidemiology of sport-related spinal cord injury around the world.	Systematic Review	NA	NA	54 articles	Other	Injuries		Rugby claimed the highest proportion of SCI caused by any one sport (74% in New Zealand) and had a mean of 23.4%, with its lowest contribution in Germany, where it accounted for only 0.7% of sports-related SCIs	Acute Health Issues		Injuries
Epidemiology of adolescent rugby injuries: a systematic review	Bleakley et al	2011	Ireland	To determine the incidence, severity, and nature of injury in adolescent rugby union players	Systematic Review	NA	NA	15 studies	Youth Male Rugby Union	Injuries		Wide variations existed in the injury definitions and data collection procedures. The incidence of injury necessitating medical attention varied with the definition, from 27.5 to 129.8 injuries per 1000 match hours. The incidence of timeloss injury (>7 days) ranged from 0.96 to 1.6 per 1000 playing hours and from 11.4/1000 match hours (>1 day) to 12–22/1000 match hours (missed games). The highest…	Acute Health Issues		Injuries
Training volume and soft tissue injury in professional and non-professional rugby union players: a systematic review	Ball et al	2017	Australia	To investigate the relationship between training volume and soft tissue injury incidence, and characterise soft tissue injury in rugby union players.	Systematic Review	NA	NA	15 studies were eligible for inclusion	Other	Injuries		A higher level of play may result in higher match injury incidence. Muscle and tendon injuries were the most common type of soft tissue injury, while the lower limb was the most common location of injury in rugby union players, and running was responsible for the highest injury incidence during non-contact events. Overall match and training injury incidence ranged from 3.3 to 218.0 injuries/1000 …	Acute Health Issues		Injuries
Match and Training Injuries in Women's Rugby Union: A Systematic Review of Published Studies.	King et al	2019	NZ	The aim of this systematic review was to describe the injury epidemiology for women's rugby-15s and rugby-7s match and training environments.	Systematic Review	NA	NA	10 articles	Other	Injuries		Women's rugby-7s had a higher un-pooled injury incidence than women's rugby-15s players based on rugby-specific surveys and hospitalisation data. The incidence of injury in women's rugby-15s and rugby-7s was lower than men's professional rugby-15s and rugby-7s competitions but similar to male youth rugby-15s players. Differences in reporting methodologies limited comparison of results. Women's ru…	Acute Health Issues		Injuries
Epidemiology of Head Injuries Focusing on Concussions in Team Contact Sports: A Systematic Review	Prien et al	2018	Germany	The aim of this review was to compare the incidence of concussions and other head injuries in elite level football, rugby, ice hockey and American Football.	Systematic Review	NA	NA	12 studies in rugby	Other	Injuries		In rugby HIID ranged from 0.05 [95] to 14.58 [92] per 1000 h and 0.60 [97] to 9.64 [99] per 1000 Aes. Overall, the highest incidence rates were found in rugby and in a match context. while in rugby more players seem to incur or report a concussion, similar rates were observed when evaluating the incidence of all head injuries. This may be due to an actual difference in concussion incidence or ref…	Acute Health Issues		Concussion
The incidence of concussion in youth sports: a systematic review and meta-analysis	Pfister et al	2016	Canada	To conduct a comprehensive systematic review and meta-analysis of studies assessing the incidence of concussion in youth athletes. Specifically, we estimate the overall risk of concussion in youth sports and compare sport-specific estimates of concussion risk.	Systematic Review & Meta-Analysis	NA	NA	4 studies in rugby	Other	Injuries		The three sports with the highest incidence rates were rugby, hockey and American football at 4.18, 1.20 and 0.53, respectively.	Acute Health Issues		Concussion
Concussion in youth rugby union and rugby league: a systematic review	Kirkwood et al	2015	UK	To describe anthropometric and match performance profiles of international Rugby Sevens players and explore correlations between anthropometric characteristics and work-rates in matches.	Systematic Review	NA	NA	There were 25 studies retrieved with data on child or adolescent rugby and concussion, 20 were on rugby union (2 unspecified)	Youth Male Rugby Union	Injuries		The incidence of child and adolescent match concussion ranged from 0.2 to 6.9 concussions per 1000 player-hours for rugby union, equivalent to a probability of between 0.3% and 11.4% for rugby union	Acute Health Issues		Concussion
A systematic review and meta-analysis of concussion in rugby union	Gardner et al	2014	Australia	The aim of the current review was to systematically evaluate the available evidence on concussion in Rugby Union and to conduct a meta-analysis of findings regarding the incidence of concussion.	Systematic Review & Meta-Analysis	NA	NA	The final search outcome following the eligibility screening process resulted in the inclusion of 96 articles for this review. The meta-analysis included a total of 37 studie	Other	Injuries		The results of the meta-analysis revealed an overall incidence of match-play concussion in men's rugby-15s of 4.73 per 1,000 player match hours. The incidence of concussion during training was 0.07 per 1,000 practice hours. The incidence of concussion in women's rugby-15s was 0.55 per 1,000 player match hours. In men's rugby-7s match-play, concussion incidence was 3.01 per 1,000 player match hour…	Acute Health Issues		Concussion

## Sheet: Physical Demand
Bibliographic Information				Aims & Methods						Outcomes			Themes
Title	Authors	Year of publication	Country of origin	Aims/purpose	Methodology	Duration of intervention	Intervention type, comparator, details of these (e.g. duration of the intervention) (if applicable)	Study population and sample size (if applicable)	Form of rugby	Outcomes	Emergenct Themes/Concepts	Key findings	New Initial Theme	? Second Theme	Sub-Theme
The physical demands of elite English rugby union	Roberts et al	2008	UK	Provide an assessment of the physical demands of English elite level RU players	Player movements were captured by five distributed video cameras	NA	NA	29 English Premiership level rugby players from same club	Elite Male Rugby Union	Rugby & Physical Activity/Physiologic Demand		Mean time spent in each movement speed range n min:s(forwards & backs respectively). Stand 25:55 vs 23:18. Walk 28:03 vs 36:47. Jog 13:37 vs 13:36. Med run 3:15 (both). High run 0:52 vs 1:19. Sprint 0:20 vs 0.27.	Physical Demand		Activity Profile
Physiological demands of women's rugby union: time-motion analysis and heart rate response	Virr et al	2014	Canada	To quantify movement patterns as well as monitor match heart rates of female premier first division club rugby union athletes	Time-motion analysis and heart rate (HR) response	One match	One match of rugby	Eight (8) premier and first division club level female rugby players volunteered to participate in this investigation. Four (4) were video taped throughout a complete game Heart rates of all 8 athletes were monitored for the entire game	Amateur Female Rugby Union	Rugby & Physical Activity/Physiologic Demand		Women's rugby union is characterised by intermittent bursts of high-intensity activity. Whole game movement category durations in mins (approx.). Stand 20. Walk 35. Jog 10.5. Stride 3. Sprint 2. Static Exertion 8.	Physical Demand		Activity Profile
The use of Global Positioning System (GPS) tracking devices to assess movement demands and impacts in Under-19 Rugby Union match play: sports technology	Venter et al	2011	South Africa	To use GPS technology to obtain information on elite Under-19 rugby union forward and back players with regard to movement patterns, as well as impacts from collisions experienced by players	GPS data	Five matches	Five matches	Seventeen Under-19 male rugby players from a provincial rugby institute in Stellenbosch, South Africa	Elite Academy Rugby Union	Rugby & Physical Activity/Physiologic Demand		1) Players covered on average a total distance of 4469.95 ± 292.25 m during a game . Percentage time spent in speed zones: Standing: consistently approx. 20-21% Walking: 42-60% Jogging: 16-26% Striding: 3-10% Sprinting: 0.4-1%	Physical Demand		Activity Profile
GPS comparison of training activities and game demands of professional rugby union	Tee et al	2016	South Africa	To determine the specificityof typical training activities in rugby union, by com-parison with the demands of match-play	GPS	Players were monitored during 96 training sessions overa 25-month period from September 2011 to October 2013. Training session activities were compared to datafrom 24 matches played by the same team during the2013 rugby seaso	NA	Fifty-three male rugby union players (age 25_x0003_3 years,stature 186_x0003_7 cm and body mass 101.5_x0003_12.2 kg),representing a professional South African rugby team	Elite Male Rugby Union	Rugby & Physical Activity/Physiologic Demand		Total distance covered: 5050±1636m.	Physical Demand		Activity Profile
Quantification of activity during wheelchair basketball and rugby at the National Veterans Wheelchair Games: A pilot study	Sporner et al	2009	USA	To provide quantitative information of selected characteristics of wheelchair basketball and rugby game play	An MDL (mini data logger) was installed on a wheel of eachathlete’s sports wheelchair to record time stamped wheel rotation data during thetournamen	Wheelchair rugby games at National Veterans Wheelchair Games	Wheelchair rugby games at National Veterans Wheelchair Games	18 individuals who participated in wheelchair rugby at the 2007 and 2008 NVWG	Wheelchair Rugby	Rugby & Physical Activity/Physiologic Demand		The results of this study show that the majority (475%) of the wheelchair athletesin this study (n¼14 rugby,n¼16 basketball) reach the CDC recommended 20 min ofactivity during a wheelchair basketball or rugby game. The benefits of participating inorganized sporting events and recreation have been well documented17and promotingparticipation in wheelchair basketball and rugby may influence activity…	Physical Demand		Activity Profile
A Comparison of the Match Demands of International and Provincial Rugby Sevens	Ross et al	2015	NZ	To compare the running demands and match activity profiles of international and provincial rugby sevens players.	Global positioning system analysis was completed during international and provincial tournament matches. Video analysis was also used to quantify the individual match activities during tournament matches.			84 rugby sevens players, consisting of 16 international players from 1 team and 68 provincial players from 8 teams.	Elite Male 7s	Rugby & Physical Activity/Physiologic Demand		These findings demonstrate that both physical and technical factors distinguish international and provincial rugby sevens, although overall match demands are similar. Running demands of provincial & international players: 105m/min. Internationals covered greater distance at very high speed (ES = 0.30) and performing a greater number of sprints (ES = 0.80).	Physical Demand		Activity Profile
The match demands of international rugby sevens	Ross et al	2015	NZ	The purpose of this study was to quantify the global match demands of international rugby sevens and to compare the match demands of forwards and backs, and between tournament rounds.	To assess the match demands, global positioning system (GPS) and video analysis were collected from 27 international rugby sevens players from the same team across an entire International Rugby Board Sevens World Series season	One international sevens season	NA	27 players split into forwards (N = 12, age 24.4 ± 3.3 years; height 188 ± 4.8 cm; mass 95.4 ± 6.3 kg) and backs (N = 15, age 23.3 ± 2.9 years; height 183 ± 4.2 cm; mass 89.7 ± 5.9 kg) from the same international male rugby sevens team. Players made 406 appearances in 54 matches played in nine tournaments during the 2012–13 IRB Sevens World Series.	Elite Male 7s	Rugby & Physical Activity/Physiologic Demand		When compared to an 80 min 15-a-side rugby union match, over the course of a tournament rugby sevens starters cover ~51% and ~82% greater total distance, (backs and forwards, respectively). Per match running demands (pool & cup respectively)(m): 1446 ± 299 & 1423 ± 285	Physical Demand		Activity Profile
Investigation of anthropometric and work-rate profiles of Rugby Sevens players.	Rienzi et al	1999	Uruguay	To describe anthropometric and match performance profiles of international Rugby Sevens players and explore correlations between anthropometric characteristics and work-rates in matches.	Profiles (work-rate analysis during matches (n = 30) and a comprehensive anthropometry profile of 27 of the 30 players) of 30 male players participating in the 1996 International Rugby Sevens tournament in Uruguay were compared by means of multivariate analysis and correlation techniques.	30 matches	NA	30 male players	Elite Male 7s	Rugby & Physical Activity/Physiologic Demand		The average game duration was 1064±152s, whilst the amount of time spend in activity during each game was 861±143s – 81% of total time.	Physical Demand		Activity Profile
The physical characteristics of match-play in English schoolboy and academy rugby union	Read et al	2018	UK	The aim was to compare the physical characteristics of under-18 academy and schoolboy rugby union competition by position	Using a microsensor unit, match characteristics were recorded in 66 players. Locomotor characteristics were assessed by maximum sprint speed (MSS) and total, walking, jogging, striding and sprinting distances	Anentireseason of academy matches were assessed (six117matches), withamatchednumberof school games.	Anentireseason of academy matches were assessed (six117matches), withamatchednumberof school games.	66p layers were recruited from two playing standards (regional academy and schools)	Youth Male Rugby Union	Rugby & Physical Activity/Physiologic Demand		Forwards from the academy (5461 263± 360 m) and school (4881 ± 388 m). Backs from the academy (5639 ± 368 m) and school (5260 ± 441 265m)	Physical Demand		Activity Profile
Movement and physical demands of school and university rugby union match-play in England	Read et al	2016	UK	To explore the movement and physical demands of the sport and how they progress by age	Ninety-six male rugby union players wore microtechnology devices during six rugby union matches within the education pathway to investigate the movement and physical demands of match-play. To quantify the positional differences and progression by age, data were obtained for participants at the under 16 (U16) (n=31 participants), under 18 (U18) (n=34 participants) and university (n=31 participants…	NA	NA	NA	Youth Male Rugby Union	Rugby & Physical Activity/Physiologic Demand		Range of match-play data for adolescent male rugby union players (U16-18s, forwards & backs). Total distance: 3884-5889m (increases with age).	Physical Demand		Activity Profile
Positional demands of international rugby union: evaluation of player actions and movements	Quarrie et al	2013	NZ	To analyse movements and activities of players in international rugby union matches with a sample size sufficient to clearly delineate positional roles.	Actions of 763 players were coded from video recordings of 90 international matches played by the New Zealand national team (the All Blacks) from 2004 to 2010. Movements of players were coded for 27 of these matches via a semi-automated player-tracking system. Movements and activities of all players from both teams were coded.	NA	NA	NA	Elite Male Rugby Union	Rugby & Physical Activity/Physiologic Demand		The typical distance moved during active time for a full match ranged from 3700 m for Number 8 forwards through to 4500 m for scrum-halves. Active time per match was 36:21 ± 2:40 min:s (mean ± sd).	Physical Demand		Activity Profile
Sports game play: a comparison of moderate to vigorous physical activities in adolescents	Patience et al	2013	USA	The purpose of this study was to compare traditional team sport activities with flag rugby	We studied 101 (55 males; 46 females, age 11-14) students who participated in flag football (FF), basketball (BB), and flag rugby (FR). Activity counts were collected using accelerometers. Perceived competence and enjoyment were measuredusing the intrinsic motivation inventory				Other	Other (please add to emergent themes)	Multiple Themes	The differences found among the three sports in this study demonstrated that FR is on average more enjoyable than BB and FF. FR appears to be more vigorous and participants felt more competent in the game. It is presumed that the participants may have felt more competent in FR game because it was easy to learn and had relatively few rules. Additionally, results related to MET values indicate that…	Physical Demand	Mental Health and Function	Activity Profile
Analysis of the physical demands of international rugby union	McLean	1992	UK	The aim of this study was to investigate the physical demands of international rugby union	Five games in the 1989-90 Five Nations Championship were analysed using video-recordings of live television transmissionsn and time-motion analysis was used to quantify demands. The density of work was measured by timing the work:rest ratios (W:RRs) throughout each game.				Elite Male Rugby Union	Rugby & Physical Activity/Physiologic Demand		When the ball was in open play, the average running pace of players central to the action ranged from 5 to 8 m s-1. This together with scrum, lineout, ruck and maul was classified as high-intensity exercise. The mean duration of the work periods was 19 s and the most frequent W:RRs were in the range of 1:1 to 1:1.9. The ball was in play for an average of 29 min during a scheduled time of play of …	Physical Demand		Activity Profile
Group cohesion as a contributor to participation in adaptive sport among adults with spinal cord injury and other health conditions	Lydick	2017	USA	To characterize: 1) the relationships between group cohesion and leisure time physical activity (LTPA) among adults with spinal cord injury (SCI) or other health conditions that limit mobility and who participate in adaptive sport 2) between self-efficacy for exercise and social support for exercise in this subpopulation, and 3) to describe the level of leisure time physical activity being achiev…	This was a cross-sectional study that included 107 adult participants, 57 of whom reported SCI. Self-report measures were administered to assess group cohesion, social support for exercise, and self-efficacy for exercise as primary predictors, as well as certain demographic, health and athletic background data as potential covariates. LTPA was assessed as the primary outcome variable. Time with t…				Wheelchair Rugby	Rugby & Physical Activity/Physiologic Demand		Group cohesion is associated with LTPA in adults with severe mobility limitations who participate in adaptive sport and provides an important focus for future study of physical activity maintenance among groups at high risk for hypoactive lifestyle. Persons with mobility limitations who participate in adaptive sport may be achieving LTPA levels that are recommended for achieving health and fitnes…	Physical Demand		Activity Profile
Quantifying positional and temporal movement patterns in professional rugby union using global positioning system	Jones et al	2015	UK	To assess the positional and temporal movement patterns of professional rugby union players during competition using global positioning system (GPS) units	GPS data were collected from 33 professional rugby playersfrom 13 matches throughout the 2012–2013 season sampling at 10 Hz. Players wore GPS units from which informationon distances, velocities, accelerations, exertion index, player load, contacts, sprinting and repeated high-intensity efforts(RHIE) were derived. Data files from players who played over 60 min (n= 112) were separated into five po…				Elite Male Rugby Union	Rugby & Physical Activity/Physiologic Demand		Up to 20 bouts of repeated high intensity exercise bouts in course of a whole game	Physical Demand		Activity Profile
Motion analyses of adolescent rugby union players: a comparison of training and game demands	Hartwig et al	2011	Australia	The aim of this study was to describe and compare the game demands and on-field training practices of adolescent rugby union players using time-motion analyses. A second aim was to compare the physiological demands of different player positions.	Between 2003 and 2008, 118 male adolescent rugby players aged 14 to 18 years were recruited from 10 teams representing 3 levels of adolescent rugby. Timemotion analyses using global positioning satellite tracking devices (SPI10; GPSports Systems Pty Ltd 2003) and computer-based tracking software (Trak Performance; Sports Tec Pty Ltd) applied to video footage determined player movement patterns 16…				Elite Academy Rugby Union	Rugby & Physical Activity/Physiologic Demand		Percentage of the time in various speed states (forwards vs backs): Stationary: 44.5 vs 32.7% Walking 35.5 vs 48.8% Jogging 14.5 vs 13.6% Striding 3.6 vs 3.1% Sprinting 0.9 vs 1.3%	Physical Demand		Activity Profile
Movement Demands of Elite Under-20s and Senior International Rugby Union Players	Cunningham et al	2016	UK	This study compared the movement demands of elite international Under-20 age grade (U20s) and senior international rugby union players during competitive tournament match play	Forty elite professional players from an U20 and 27 elite professional senior players from international performance squads were monitored using 10Hz global positioning systems (GPS) during 15 (U20s) and 8 (senior) international tournament matches during the 2014 and 2015 seasons. Data on distances, velocities, accelerations, decelerations, high metabolic load (HML) distance and efforts, and numb…				Other	Rugby & Physical Activity/Physiologic Demand		Movement Characteristics for Senior & U20 forards & backs. Total distance: 5.37-6.36km. High Speed Running: 263-656m.	Physical Demand		Activity Profile
Physical game demands in elite rugby union: a global positioning system analysis and possible implications for rehabilitation	Coughlan et al	2011	Ireland	To evaluate the physical demands of an international Rugby Union-level game using a global positioning system (GPS).	GPS data from 2 players, a back and a forward, were collected during an international Rugby Union game. Locomotion speed, total body load, and body load sustained in tackles and scrums were analyzed.				Elite Male Rugby Union	Rugby & Physical Activity/Physiologic Demand		The back covered a greater overall distance (7002 m) compared to the forward (6427 m). Players completed almost 75% of the total match distance in lower intensity activities (standing, nonpurposeful movements, walking, or jogging).	Physical Demand		Activity Profile
Movement Patterns and Metabolic Responses During an International Rugby Sevens Tournament	Couderc et al	2017	France	To investigate the running demands and associated metabolic perturbations during an official rugby sevens tournament.	Twelve elite players participated in 7 matches wearing GPS units. Maximal sprinting speed (MSS) and maximal aerobic speed (MAS) were measured. High-intensity threshold was individualized relative to MAS (>100% of MAS), and very-high-intensity distance was reported relative to both MAS and MSS. Blood samples were taken at rest and after each match.				Elite Male Rugby Union	Rugby & Physical Activity/Physiologic Demand		Mean relative total distance covered was 91 ± 13 m/min with ~17 m/min at high-intensity.	Physical Demand		Activity Profile
Repeated High-Intensity Effort Activity in International Male Rugby Sevens	Couderc et al	2019	France	The aim of this study was to analyze the RHIE profile during Rugby Sevens matches and to determine how this profile differed among playing positions and across the course of a game.	In this study, 15 elite players competed in 44 matches during the HSBC World Sevens Series. Global positioning systems and match analysis software were used to quantify the frequency of repeated running and collision efforts. High acceleration ($2.5 m$s22), high speed (above maximal aerobic speed), sprint (above 85% of maximal sprint speed), and collision efforts (tackles, ruck, and contact) were…				Elite Male Rugby Union	Rugby & Physical Activity/Physiologic Demand		On average, players performed 27 high-intensity effort events across the game. In addition, although Rugby Sevens match-play duration is much shorter, the frequency of RHIE bouts observed in this study (1 bout every 3.8 minutes) was higher than previously reported in elite Rugby League (for hit-up forwards, 1 bout every 4.8 minutes)	Physical Demand		Activity Profile
Game movement demands and physical profiles of junior, senior and elite male and female rugby sevens players	Clarke et al	2017	Australia	The aim of this study was to quantify the game runningmovement patterns and the anthropometric and physicalcharacteristics of male and female rugby sevens players across3 tiers of playing levels (junior, senior, and elite). Relationshipsbetween game movements and anthropometric and physicalassessments were also quantified.	Anthropometric and physical testing (40 m sprint, vertical jump, Yo-Yo IR1) occurred prior to players’ national championships or international tournaments (n = 110 players), while game movements were obtained via GPS (n = 499 game files).				Other	Rugby & Physical Activity/Physiologic Demand		Mean game total distance covered (male & female, junior, senior & elite): 1080-1249m	Physical Demand		Activity Profile
Physiologically based GPS speed zones for evaluating running demands in Women's Rugby Sevens	Clarke et al	2015	Australia	The aim of this study was to establish, for international Women’s Rugby Sevens players, a physiologically defined threshold – speed at the second ventilatory threshold (VT2speed) – for the analysis of high-intensity running, using mean and individualised thresholds.	Game movement patterns (using 5 Hz GPS) of 12 international Women’s Rugby Sevens players (23.5 ± 4.9 years, 1.68 ± 0.04 m, 68.2 ± 7.7 kg; mean ± s) were collected at an international tournament. Seven of these players also completed a treadmill VO2max test to estimate VT2speed.				Elite Female Rugby Union	Rugby & Physical Activity/Physiologic Demand		Total game distance covered: 916 – 1140m	Physical Demand		Activity Profile
The movement characteristics of English Premiership rugby union players	Cahill et al	2013	UK	The purpose of this investigation was to quantify the movement characteristics of elite rugby union players during competitive play and identify whether position-related differences exist.	Ninety-eight elite players from eight English Premiership Clubs were tracked using global positioning systems (GPS) during 44 competitive matches throughout the 2010/2011 season. Player positions were defined as: (1) Backs or Forwards; (2) Front, Second and Back Rows, Scrum Half, Inside and Outside Backs; (3) 15 individual positions (numbers 1–15).				Elite Male Rugby Union	Rugby & Physical Activity/Physiologic Demand		Median total distance covered: forwards 5850m vs backs 6545m	Physical Demand		Activity Profile
Intensity level and on-court role of wheelchair rugby players during competition	Borel et al	2019	France	This study aims at quantifying the level of physical activity of wheelchair rugby players during matches in order to compare defensives players (DP) and offensives players (OP) profiles	Fifty-two players, including 24 DP and 28 OP (mean age of 34±9 years), from eight French teams involved in the national elite championship and in the French national cup, participated. The seven wheelchair rugby players’ classes were differentiated from 0.5 points (most severe deficiencies) to 3.5 points (less severe deficiencies). DP and OP were regrouped from 0.5 to 1.5 points and from 2 to 3.5…				Wheelchair Rugby	Rugby & Physical Activity/Physiologic Demand		Statistical analysis between DP and OP showed a significant difference in vigorous activity time with a higher vigorous activity time for OP than DP; P<0.007), associated with higher mean intensity level for OP vs. DP (4.3±1.0 METs vs. 3.8±0.9 METs respectively; P=0.049). No significant differences between DP and OP were found for active energy expenditure (385±158 kcal vs. 446±199 kcal, for DP a…	Physical Demand		Activity Profile
Comparison of Game Movement Positional Profiles Between Professional Club and Senior International Rugby Union Players	Beard et al	2019	UK	The purpose of this study was to compare the game movement demands between professional club and senior international rugby union players.	Data were obtained from 188 players from 4 professional club teams (Rabo Direct Pro12) and the affiliated international team during the 2014–15 season. Players were tracked by global positioning system (GPS) sampled at 10 Hz and were categorized into 6 different positional groups (front row forwards, FRF; second row forwards, SRF; back row for-wards, BRF; half backs, HB; centres, C; outside backs…				Elite Male Rugby Union	Rugby & Physical Activity/Physiologic Demand		Mean total distance covered varies according to positions & level (club vs international): 4689m – 7229m	Physical Demand		Activity Profile
The physical demands of Super 14 rugby union	Austin et al	2011	Australia	The aim of the current review was to systematically evaluate the available evidence on concussion in Rugby Union and to conduct a meta-analysis of findings regarding the incidence of concussion.	he movements of 20 players from Super 14 rugby union team during the 2008 and 2009 seasons were video recorded. Methods Using time-motion analysis (TMA), five players from four positional groups (front-row forwards, back-row forwards, inside backs and outside backs) were assessed.				Elite Male Rugby Union	Rugby & Physical Activity/Physiologic Demand		Players covered between 4218 m and 6389 m during the games. The maximum distances covered in a game by the four groups were: front row forwards (5139 m), back row forwards, (5422 m), inside backs (6389 m) and outside backs (5489 m). The back row forwards spent the greatest amount of time in high-intensity exercise (1190 s), followed by the front row forwards (1015 s), the inside backs (876 s) and…	Physical Demand		Activity Profile
Metabolic equivalent (MET) intensities of culturally-specific physical activities performed by New Zealanders	Moy et al	2006	NZ	This study's purpose was to objectively measure the intensity, expressed as metabolic equivalents (METs), of free-living physical activities (PAs) performed by New Zealanders	A sample of 186 European/Other (n=60), Maori (n=61), and Pacific (n=65) males and females (mean age 48.6 plus or minus 16.4 yrs) underwent 3 days of minute-by-minute heart rate monitoring (HRM) with individual calibration on a cycle ergometer. Mean METs were derived from average heart rate readings and compared to published equivalents from the United States (US) Compendium of Physical Activities.				Amateur Male Rugby Union	Rugby & Physical Activity/Physiologic Demand		METs Rugby, union, team, competitive 8.3 (8.1–8.5). METs Rugby, touch, non-competitive 6.3 (5.6-7.2)	Physical Demand		Activity Profile
Energy expenditure in ball games for wheelchair users	Abel et al	2008	Germany	The purpose of this study was to evaluate the EE of individuals with spinal cord injury in ball games for wheelchair-dependent persons.	Fourteen tennis players (WT), 10 basketball players (WB) and 12 rugby players (WR) completed a basal metabolism evaluation and a training test to measure respiratory parameters.				Wheelchair Rugby	Rugby & Physical Activity/Physiologic Demand		The mean value of energy expenditure of all wheelchair-dependent athletes was 313.6±101.14 kcal h−1. The values of the rugby players showed significantly lower values of energy expenditure in comparison to the values of the tennis and basketball athletes. There was a significant but poor relationship between the lesion level and the energy expenditure (r=0.49). The lactate values showed no signif…	Physical Demand		CV/Met/Imm Demand
Movement and physiological demands of international and regional men's touch Rugby matches	Beaven et al	2014	UK	To compare the internal and external match demands imposed on international and regional standard male touch rugby players	The study adopted a cohort design with independent groups. Twelve international players (mean age 27.8 ± 6.2 y, body mass 72.8 ± 3.7 kg, stature 174.5 ± 5.4 cm) and nine regional players (mean age 25.5 ± 5.5 y, body mass 74.2 ± 7 kg, stature 174.1 ± 7 cm) were analysed during nine competitive matches from the 2013 season. Movement demands were measured using a 5 Hz global positioning system (GPS)…				Other	Rugby & Physical Activity/Physiologic Demand		During matches international players performed at lower percentages of their peak heart rate compared to national players (80.6 ± 4.3 cf. 83.5 ± 5.1%, respectively). Total distance 1) International players: 2265.8 ± 562.3 2) Regional players: 2970.6 ± 558.9	Physical Demand		CV/Met/Imm Demand
The ball in play demands of international rugby union	Pollard et al	2018	UK	To analyse movements and activities of players in international rugby union matches with a sample size sufficient to clearly delineate positional roles.	A total of 88 GPS files from eight international test matches were collected during 2016. An Opta sportscode timeline was integrated into the GPS software to split the data into BiP periods. Metres per min (mmin<sup>-1</sup>), high metabolic load per min (HML), accelerations per min (Acc), high speed running per min (HSR), and collisions per min (Coll) were expressed relative to BiP periods and o…	Eight matches	Eight matches	22 international rugby players	Elite Male Rugby Union	Rugby & Physical Activity/Physiologic Demand		Running demands across whole match: 67.6m/min. 5.5 bouts of high-speed running per minute per match.	Physical Demand		CV/Met/Imm Demand
Effects of rugby sevens matches on human neutrophil-related non-specific immunity	Takahashi et al	2007	Japan	To evaluate the influences of the accumulative effect of two consecutive rugby sevens matches (Sevens) on aspects of human neutrophil-related non-specific immunity	Neutrophil reactive oxygen species (ROS) production capability and phagocytic activity were measured using flow cytometry, and serum opsonic activity (SOA) was assessed by measuring neutrophil ROS using the peak height of lucigenin-dependent chemiluminescence before and after two consecutive matches	Two consecutive sevens matches	The mean (SD) participation times in each match were 10.3 (4.2) and 10.0 (4.3) min, respectively	Seven players of the Japan Sevens squad, with an average age (standard deviation (SD)) of 20.7 (1.3) years. The body weight and height of the subjects were 86.4 (8.4) kg and 179.3 (8.2) cm, respectively	Elite Male 7s	Physical Health		From an immunological viewpoint - when rugby players play two consecutive Sevens matches, the exercise loading is thought to be hard, similar to that experienced during a marathon race and intensive or long training in a training camp	Physical Demand		CV/Met/Imm Demand
Influence of different small-sided games on physical and physiological demands in rugby union players	Vaz et al	2016	Portugal	to describe the influence of four different small-sided games with 15-min duration on physical andphysiological demands in rugby union players	Data were collected using global positional systems technology with heart rate monitoredcontinuously across training sessions	One sevens match	One sevens match	Fourteen rugby union players (22.4_x0002_3.2 years) participated in the study.	Amateur Male 7s	Rugby & Physical Activity/Physiologic Demand		Players spent the majority of time above 90% of the HRmax	Physical Demand		CV/Met/Imm Demand
Differences between experienced and novice Rugby Union players during small-sided games	Vaz et al	2012	Portugal	To compare physical exertion and game performance indicators of experienced and novice Rugby Union players when playing small-sided games.	GPS units and heart rate belt	Eight 6 vs 6 small-sided games over a 4-wk. period, with 12 min. continuous duration in a 60 ×40 m playing area		40 males	Other	Rugby & Physical Activity/Physiologic Demand		The results for heart rate-related indicators showed similarly high energetic demands while playing small-sided games (above 90% HR max) for ex-perienced and novice players alike	Physical Demand		CV/Met/Imm Demand
Positional demands of professional rugby	Lindsay et al	2015	NZ	The aim of this study was to investigate the contemporary demands of each position and whether they can explain changes in psychophysiological stress	Urine and saliva samples were collected before and after five selected Super 15 rugby games from 37 players. Total neopterin (NP), cortisol and immunoglobulin A were analysed by SCX-high performance liquid chromatography and enzyme linked immunosorbent assay. Global positioning system software provided distance data, while live video analysis provided impact data. All contemporary demands were an…				Elite Male Rugby Union	Rugby & Physical Activity/Physiologic Demand		The significant change in salivary cortisol, sIgA and urinary total NP is in accordance with previous studies in rugby union. Time course of changes in immuneoendocrine markers following an international rugby game. It identifies professional rugby as a sport of severe intensity causing changes in several key physiological systems. sIgA has been routinely utilised in several exercise contexts. Ch…	Physical Demand		CV/Met/Imm Demand
A new approach to quantifying physical demand in rugby union	Lacome et al	2014	France	To describe an original approach to assessing individual workload during international rugby union competitions	Sixty-seven files from 30 French international rugby union players were assessed on a computerised player-tracking system during five international games. Each player’s action was split up into exercise and recovery periods according to his individual velocity threshold. Exercise-to-recovery (E:R) period ratios and acceleration were calculated.				Elite Male Rugby Union	Rugby & Physical Activity/Physiologic Demand		About 40% of exercise periods were classified as medium intensity. Exercise intensity: between 24-52% of exercise performed above maximal aerobic velocity (position dependent)	Physical Demand		CV/Met/Imm Demand
Salivary immunoglobulin A response to a collegiate rugby game	Koch et al	2007	USA	We tested the hypothesis that salivary IgA levels will be decreased after a collegiate rugby game	Saliva samples obtained from 16 men's college rugby players before and after an 80-minute regulation rugby game were analyzed for total volume, IgA, total protein content, and osmolality. Salivary IgA was expressed relative to secretion rate (s-IgA), osmolality (IgA-Osm), and total protein (IgA-Pro).				Amateur Male Rugby Union	Physical Health		No significant pregame-postgame changes in salivary IgA were observed (s-IgA: -13%, IgA-Osm: -16%, IgA-Pro: +10%). These data indicate that strenuous physical activity, such as a competitive rugby game, does not affect IgA levels.	Physical Demand		CV/Met/Imm Demand
Exercise intensity during wheelchair rugby competition	Hor et al	2012	France	The purpose of this study is to assess the exercise intensity in competition for subject practicing wheel chair rugby.	Six men (26,1 ± 4,5 years, two quadriplegics, an amputee, a cerebral palsy, two subjects with Charcot-Marie-Tooth disease) performed an assessment of their maximal oxygen consumption (VO2max in ml/kg/min) in laboratory (continuous peak exercise test on cycle ergometer for wheelchair). During exercise testing, the heart rate at ventilatory threshold 2 (HRvt2) and the maximal heart rate (HRmax) wer…				Wheelchair Rugby	Rugby & Physical Activity/Physiologic Demand		The mean heart rate obtained during the game time was 145 ± 28 bpm. The mean percentage of time spent HRvt2 or above and 90% HRmax or above is respectively 53% ± 22% and 34% ± 19% regardless of classification level. Results of this study indicate that wheelchair rugby enables some players to reach an exercise intensity associated with improvements in cardiorespiratory parameters and that the trai…	Physical Demand		CV/Met/Imm Demand
Activity Profiles and Physiological Responses of Representative Tag Football Players in Relation to Playing Position and Physical Fitness	Hogarth et al	2015	Australia	To determine the physical fitness, match-activity profiles and physiological responses of representative tag football players and examined the relationship between physical fitness and the match-activity profile	icrotechnology devices and heart rate (HR)chest straps were used to determine the match-activity profiles of sixteen tag football play-ers for five matches during the 2014 Australian National Championships. The relationshipsbetween lower body muscular power, straight line running speed and Yo-Yo intermittentrecovery test level 2 (Yo-Yo IR2) and the match-activity profile were examined using Pear-…				Male Touch Rugby	Rugby & Physical Activity/Physiologic Demand		Percentage of time spent in various heart rate zones: approx. 75-80% of time >80% Hrpeak	Physical Demand		CV/Met/Imm Demand
Comparison of Activity Profiles and Physiological Demands Between International Rugby Sevens Matches and Training	Higham et al	2016	Australia	To compare the activity profiles and physiological demands between international rugby sevens matches and training	Twenty-two international matches and 63 rugby-specific training drills were monitored in 25 backs and 17 forwards from a national squad of male rugby sevens players over a 21-month period. Drills were classified into 3 categories: lowintensity skill refining (n = 23 drills, 560 observations), moderate- to high-intensity skill refining (n = 28 drills, 600 observations), and game simulation (n = 12…				Elite Male 7s	Rugby & Physical Activity/Physiologic Demand		Mean heart rate of forwards & backs during international matches (% of maximum) 86.9 & 85.0. Cardiovascular load (The cumulative time in 5 heart rate zones was multiplied by a weighting factor (50– 59% HRmax = 1, 60–69% HRmax = 2, 70–79% HRmax = 3, 80–89% HRmax = 4, and $90% HRmax = 5) to linearly scale the intensity of activity. The adjusted values were then summated to indicate the cardiovascul…	Physical Demand		CV/Met/Imm Demand
Running and Metabolic Demands of Elite Rugby Union Assessed Using Traditional, Metabolic Power, and Heart Rate Monitoring Methods	Dubois et al	2017	France	The aims of this study were (1) to analyze elite rugby union game demands using 3 different approaches: traditional, metabolic and heart rate-based methods (2) to explore the relationship between these methods and (3) to explore positional differences between the backs and forwards players	Time motion analysis and game demands of fourteen professional players (24.1 ± 3.4 y), over 5 European challenge cup games, were analyzed. Thresholds of 14.4 km·h-1, 20 W.kg-1 and 85% of maximal heart rate (HRmax) were set for high-intensity efforts across the three methods.				Elite Male Rugby Union	Rugby & Physical Activity/Physiologic Demand		The mean % of HRmax was 80.6 ± 4.3 % while 42.2 ± 16.5% of game time was spent above 85% of HRmax with no significant differences between the forwards and the backs. The HR monitoring methods demonstrate clearly the high physiological demands of professional rugby games	Physical Demand		CV/Met/Imm Demand
Heart rate, blood lactate and kinematic data of elite colts (under-19) rugby union players during competition	Deutsch et al	1998	Australia	It was the aim of the present study to establish the position-specific physiological and kinematic demands of rugby union using accepted and validated procedure	eart rate, blood lactate and time-motion analysis data were collected from 24 players (mean +/- s(x): body mass 88.7 +/- 9.9 kg, height 185 +/- 7 cm, age 18.4 +/- 0.5 years) during six competitive premiership fixtures. Six players were chosen at random from each of four groups: props and locks, back row forwards, inside backs, outside backs. Heart rate records were classified based on percent tim…				Youth Male Rugby Union	Rugby & Physical Activity/Physiologic Demand		The heart rate data indicated that props and locks (58.4%) and back row forwards (56.2%) spent significantly more time in high exertion (85-95% HRmax) than inside backs (40.5%) and outside backs (33.9%) (P < 0.001). Inside backs (36.5%) and outside backs (38.5%) spent significantly more time in moderate exertion (75-84% HRmax) than props and locks (22.6%) and back row forwards (19.8%) (P < 0.05).…	Physical Demand		CV/Met/Imm Demand
Time course of changes in immuneoendocrine markers following an international rugby game	Cunniffe et al	2010	UK	The aim of this study was to evaluate the time course of changes in selected immunoendocrine and inflammatory markers following an international rugby union game	Blood samples were taken from players (n = 10) on camp entry, the morning of the game (pre), immediately after (post) and 14 and 38 h into a passive recovery period				Elite Male Rugby Union	Rugby & Physical Activity/Physiologic Demand		A game of international rugby elicits disturbances in host immunity, which last up 38 h into the recovery period	Physical Demand		CV/Met/Imm Demand
Exercise intensity during wheelchair rugby training	Barfield et al	2010	USA	The purpose of this study was to determine the ability of individuals with a cervical spinal cord injury to achieve and sustain acardiorespiratory training intensity during wheelchair rugby.	Nine wheelchair rugby players completed a continuous peakexercise test on a SciFit Pro I arm ergometer with stage increases each minute to determine peak heart rate and poweroutput. Approximately one week after peak exercise testing, heart rate was recorded (every 5 s) during three regularlyscheduled rugby training sessions. Data were analysed to determine the number of continuous minutes that pa…				Wheelchair Rugby	Rugby & Physical Activity/Physiologic Demand		The percent of time spent at or above 70% heartrate reserve varied across participants and conditions. Continuous pushing was the least variable training condition amongparticipants with the sample averaging greater than 73% of time above the target heart rate. Scrimmage training was highlyvariable across participants with a range of 0% to 98% of time above the criterion. Results of this study in…	Physical Health and Function		CV/Met/Imm Demand
Physical Demands of Women's Rugby Sevens Matches: Female Athletes in Motion (FAiM) Study	Vescovi et al	2015	Canada	To examine the locomotor, metabolic power and heart rate demands for several standards of women’s sevens matches	4 Canadian teams were monitored during the USA Rugby Sevens event using global positioning sys-tem technology with players classified as Inter-national (n = 16) or Developmental (n = 13).	Rugby Sevens Tournament	Multiple Rugby 7s matches (7-mins long) - data standardised for per match	Female rugby sevens players from the Canadian National Team (n = 22) and a university squad (n = 25) - only 29 used in data analysis (had to play certain amount of matches)	Other	Rugby & Physical Activity/Physiologic Demand		Females 7s rugby participants spend a considerable amount of time in LMVPA but also high-intensity PA. International demands: Total distance: 1468±88 Total low-moderate intensity distance (approx.): 1116m Total high-intensity distance: 224m Time >80% max heart rate (approx.): 13mins Developmental demands: Total distance: 1252±135 Total low-moderate intensity distance (approx.): 1064n Total high-i…	Physical Demand		Multiple sub-themes
Running demands and heart rate responses in men Rugby Sevens	Suarez-Arrones et al	2012	Spain	To examine match running performance and exercise intensity in a Rugby Sevens (7s) team during competitive club-level matches	Time-motion analyses (global position system)	5 competitive matches in a 2-day tournament	5 competitive matches in a 2-day tournament	7 male rugby players	Elite Male 7s	Rugby & Physical Activity/Physiologic Demand		The players covered an average distance of 1,580.8 6 146.3 m per game (14 minutes). Over this distance, 34.8% (549.7 6 79.1 m) was spent standing and walking, 26.2% (414.8 6 105.1 m) jogging, 9.8% (154.6 6 53.5 m) cruising, 15.5% (244.5 6 80.1 m) striding, 5% (79.5 6 37.2 m) highintensity running, and 8.7% (137.7 6 84.9 m) sprinting. For over 75% of the game, the players were exposed to heart rat…	Physical Demand		Multiple sub-themes
Match-play activity profile in elite women's rugby union players	Suarez-Arrones et al	2014	Spain	To provide an objective description of the locomotive activities and exercise intensity undergone during the course of an international-level match of female rugby union	Analyzed using global positioning system tracking technology	One international level match	One match of rugby	Eight players	Elite Female Rugby Union	Rugby & Physical Activity/Physiologic Demand		The total distance covered by the players during the whole match was 5,820 /- 512 m. Over this distance, 42.7% (2,487 /- 391 m) was spent standing or walking, 35% jogging (2,037 /- 315 m), 9.7% running at low intensity (566 /- 115 m), 9.5% at medium intensity (553 /- 190 m), 1.8% at high intensity (105 /- 74 m), and 1.2% sprinting (73 /- 107 m). The players spent 46.9 /- 28.9% of match time betwe…	Physical Demand		Multiple sub-themes
Match running performance and exercise intensity in elite female Rugby Sevens	Suarez-Arrones et al	2012	Spain	To describe the match-play demands of professional female rugby players competing in Rugby Sevens (Rugby 7's) matches	Time-motion analyses (global position system)	5 competitive matches in a 2-day international tournament	5 competitive matches in a 2-day international tournament - one match 14 minutes	12 players	Elite Female 7s	Rugby & Physical Activity/Physiologic Demand		Players covered an average distance of 1,556.2 ± 189.3 m per game (14 minutes). 29.7% (462.6 ± 94.6 m) was spent standing and walking, 33.2% (515.9 ± 88.6 m) jogging, 11.6% (181.0 ± 61.4 m) cruising, 16.4% (255.7 ± 88.3 m) striding, 3.7% (57.1 ± 40.8 m) high-intensity running, and 5.4% (84.0 ± 64.8 m) sprinting. For over 75% of the game, the players were exposed to heart rates (HRs) >80% of their…	Physical Demand		Multiple sub-themes
Activity profiles of elite wheelchair rugby players during competition	Rhodes et al	2015	UK	To quantify the activity profiles of elite wheelchair rugby (WCR) players	Seventy-five elite WCR players from 11 national teams were monitored using a radio-frequency-based, indoor tracking system across 2 international tournaments. Players who participated in complete quarters (n = 75) and full matches (n = 25) were included	2 tournaments	NA	75 elite WR athletes	Wheelchair Rugby	Rugby & Physical Activity/Physiologic Demand		Demands: match distances of up to ~4,600 m, combined with the anaerobic demands required for ~38 high-intensity bouts per match	Physical Demand		Multiple sub-themes
Match-Play Running Performance and Exercise Intensity in Elite International Women's Rugby Sevens	Malone et al	2018	Ireland	The aim of the current investigation was to describe the running and physiological performance demands of elite women’s rugby sevens match-play	Twenty-seven (n = 27) rugby seven’s players (24.4 6 2.1 years; 168 6 7.1 cm; 67.9 6 4.3 kg) were recruited for the current investigation. Across the observational period, 36 games were analyzed; during these games, players wore global positioning system technology (10-Hz, Statsports Viper Pod; STATSports, Newry, Northern Ireland, United Kingdom) and heart rate monitors (Polar Team System, Polar E…				Elite Female 7s	Rugby & Physical Activity/Physiologic Demand		The mean distance covered during match-play was 1,625 ± 132 m which equates to a relative running performance of 116.8 6 9.4 m/min. Across the duration of match-play, players spent over 75% of the time above 80% of heart rate maximum (HRmax)	Physical Demand		Multiple sub-themes
An evaluation of the physiological demands of elite rugby union using global positioning system tracking software	Cunniffe et al	2009	UK	To evaluate the physiological demands of elite rugby union using GPS tracking software	Players (n = 2) were tracked continuously during a competitive team selection game using Global Positioning System (GPS) software				Elite Male Rugby Union	Rugby & Physical Activity/Physiologic Demand		Data revealed that players covered on average 6,953 m during play (83 minutes). Of this distance, 37% (2,800 m) was spent standing and walking, 27% (1,900 m) jogging, 10% (700 m) cruising, 14% (990 m) striding, 5% (320 m) high-intensity running, and 6% (420 m) sprinting. Players exercised at ;80 to 85% V_ O2max during the course of the game with a mean heart rate of 172 b_x0001_min21 (;88% HRmax)…	Physical Demand		Multiple sub-themes
The Effect of Contextual Factors on Physiological and Activity Profiles in International Women's Rugby Sevens	Goodale et al	2017	Canada	To evaluate the effects of contextual game factors on activity and physiological profiles of international-level women’s rugby sevens players.	Twenty international-level female rugby sevens players from the same national team participated in this study. Global positioning system and heart-rate data were collected at 5 World Rugby Women’s Sevens Series events (2013–14 season).				Elite Female 7s	Rugby & Physical Activity/Physiologic Demand		Mean HR: 88% of HRmax Total distance: 1352±306m	Physical Demand		Multiple sub-themes

## Sheet: Physical Health
Bibliographic Information				Aims & Methods						Outcomes			Themes
Title	Authors	Year of publication	Country of origin	Aims/purpose	Methodology	Duration of intervention	Intervention type, comparator, details of these (e.g. duration of the intervention) (if applicable)	Study population and sample size (if applicable)	Form of rugby	Outcomes	Emergenct Themes/Concepts	Key findings	New Initial Theme	? Second Theme	Sub-Theme
Effect of “Touch Rugby” Training on the Cardiovascular Autonomic Control In Sedentary Subjects	Filliau et al	2015	France	investigate the cardiovascular benefits of touch rugby by assessing the cardiovascular autonomic controls of participants	Baseline survey internally. Before (pre-test) and after (post-test) the period of training, cardio-respiratory recordings were achieved at rest and during a graded maximal exercise on a treadmill.	12-weeks of one 90-min touch rugby session/week		20 adults (30–64 years old) - sedentary - 10 M&F	Mixed Touch Rugby	Physical Health		Once-weekly 90-min touch rugby sessions over 3-months led to a decrease in resting heart rate and systolic blood pressyre - thus potentially conferring cardiac health benefits. modified the cardiovascular autonomic control of healthy sedentary subjects. Resting heart rate and systolic blood pressure decreased. High-frequency RR variability and the high-frequency baroreflex sensitivity increased, …	Physical Health and Function		Cardiovascular Health and Function
Effects of 8 Weeks' Training on Systemic and Muscle Oxygen Dynamics in University Rugby Players	Takagi et al	2017	Japan	To investigate the effects of 8 weeks of training on O2 dynamics in university rugby players	University rugby players (n = 15) participated in 5 strength training sessions and 4 field-based training sessions per week for 8 weeks. Before and after 8-weeks’ training, the subjects performed ramp cycling exercise until exhaustion. Muscle O2 saturation (SmO2), relative changes from rest in deoxygenated hemoglobin concentration (∆Deoxy-Hb) and total hemoglobin concentration, cardiac output (CO…	8 weeks	5 strength training sessions and 4 field-based training sessions per week for 8 weeks	15 male rugby players	Amateur Male Rugby Union	Physical Health		Though peak VO2 tended to be increased after training, there were no significant changes in CO, nor any muscle O2 dynamic variables at peak exercise between before and after training. However, an increase in peak VO2 was significantly correlated with diminishment of deoxy-Hb and an increase in SmO2. Changes in CO caused by training were not related to improved peak VO2. The improvement of peak VO…	Physical Health and Function		Cardiovascular Health and Function
Adaptations in the arterial function of female rugby athletes- a cross-sectional study	Pereira et al	2018	Portugal	The purpose of this study was to understand the effect of intensive training in the arterial mechanics of competitive rugby female players.	Fifteen female rugby athletes and fi fteen non-athletes, matched for age (mean age: 19.87 ± 2.50 years) participated voluntarily in a cross-sectional study. Carotid-femoral (cf) and carotid-radial (cr) pulse wave velocity (PWV) were measured with the Complior Analyse device in baseline conditions. With an adapted fl ow-mediated dilation paradigm, cr-PWV was measured again after a fi ve minutes fo…				Amateur Female Rugby Union	Physical Health		Rugby, a sport characterized by a moderate amount of isometric and isotonic features, is associated with a benefi cial arterial profi le in female athletes, mainly through a better endothelial function, better arterial compliance and lesser effect of the reflected waves, when compared to age-matched non-athlete girls.	Physical Health and Function		Cardiovascular Health and Function
Longitudinal Observation Of Cardiac Adaptation In Junior Rugby Players Using Echocardiography	Oguri et al	2018	Japan	The purpose of this study is to conduct a 3-year longitudinal study of cardiac adaptation in junior and senior high school athletes who play rugby with echocardiography in an effort to examine how continuous practice of rugby during the growth period affects ventricular volume expansion and ventricular septum thickening.	We measured height, body weight, blood pressure and took electrocardiogram and echocardiography measurements once a year for 3 consecutive years in these subjects. Echocardiography measurements were taken by portable ultrasonic measurement apparatus on B mode to measure left ventricular end-diastolic dimension (LVDd) and posterior left ventricle wall thickness (PWT). As a substitute for the contr…	NA	NA	Subjects were 34 male junior high and 79 senior high school rugby players with top-level game power. Subjects engaged in rugby-related training approximately 3 hours a day, 6 days a week continuously for 3 years.	Youth Male Rugby Union	Physical Health		Continuous practice of rugby in junior and senior high school was associated with marked expansion of left ventricular volume and thickening of the left ventricular septum	Physical Health and Function		Cardiovascular Health and Function
Impact of Adapted Sports Activities on the Progression of Carotid Atherosclerosis in Subjects With Spinal Cord Injury	Matos-Souza et al	2016	Brazil	To determine whether regular performance of adapted sports is associated with long-term changes in carotid atherosclerosis in subjects with spinal cord injury(SCI).	Participants: Men with chronic (>1y) SCI and no preserved motor function below the injury level were evaluated in 2007 and 2012 (N=17). Nine subjects did not perform physical activity between the studied time points (control group), whereas 8 subjects entered competitive upper-body sports programs (rugby: n=5, basketball: n=1, jiu-jitsu: n=1, and tennis: n=1) after baseline and were regularly tra…				Wheelchair Rugby	Physical Health		This follow-up study provides the first longitudinal evidence that regular upper-body sports activities are associated with long-term reductions in carotid atherosclerosis in subjects with SCI. These data suggest that the performance of adapted sports might be a potential prevention strategy aimed at reducing cardiovascular risk in individuals with SCI.	Physical Health and Function		Cardiovascular Health and Function
Nutrient intake, serum lipids and iron status of colligiate rugby players	Imamura et al	2013	Japan	The purpose of this study was: 1) to collect baseline data on nutrient intake in order to advise the athletes about nutrition practices that might enhance performance, and 2) to compare serum lipids, lipoproteins, apolipoproteins (apo), lecithin:cholesterol acyltransferase (LCAT) activity, and iron status of forwards and backs.	The sporting group was divided into 18 forwards and 16 backs and were compared with 26 sedentary controls. Dietary information was obtained with a food frequency questionnaire. Blood analysis for makers was performed.				Amateur Male Rugby Union	Physical Health		The forwards showed more atherogenic lipid profile than the backs, whereas the backs showed not only anti-atherogenic lipid profile, but also showed more atherogenic lipid profile relative to the control group. The causes of atherogenic and anti-atherogenic lipid profiles in rugby players could be multifactorial. None of the rugby players had anemia and iron depletion.	Physical Health and Function		Cardiovascular Health and Function
Effect of training on the serum lipid profile in able-bodied and spinal cord injured rugby players	Hubner-Wozniak et al	2010	Poland	The aim of the present study was to examine the effect of rugby training on the serum lipid profile in able-bodied and wheelchair players	The following groups took part in the study: sedentary able-bodied men (Group M, n=10), inactive disabled men using wheelchairs (Group MW, n=10), semiprofessional rugby players (Group R, n=10), and wheelchair rugby players (Group RW, n=10). The serum triacyloglycerols (TG), the total cholesterol (TC), the LDL cholesterol (LDLchol) and the HDL cholesterol (HDLchol) concentrations were assayed.				Other	Physical Health		The total cholesterol and the LDL cholesterol concentrations were higher in able-bodied sedentary men compared to non-disable rugby players. There was also a tendency to higher HDL cholesterol concentration in rugby players compared to sedentary men (Group R vs. M). Rugby training resulted in a significant decrease of the LDL cholesterol and an increase in the HDL cholesterol concentration, as we…	Physical Health and Function		Cardiovascular Health and Function
Lower serum leptin concentrations in rugby players in comparison with healthy non-sporting subjects--relationships to anthropometric and biochemical parameters	Haluzik et al	1998	Czech Republic	To determine whether regular physical training in rugby players would be able to de-crease their serum leptin concentrations in comparison with healthy non-sporting subjects without significant differences in body fat content	We have compared the body weight, the body mass index (BMI), the body fat content (measured by caliper as skinfold thickness) and the serum concentrations of leptin, triglycerides, total, high density and low density lipoprotein (LDL) cholesterol in 14 top rugby players and 10 healthy controls.			There were 14 top rugby-players with mean age 23.5 years and 10 healthy controls with mean age 28.6 years included in the study	Elite Male Rugby Union	Physical Health		The serum leptin concen-trations in both groups positively correlated withthe BMI and body fat content and also with LDLconcentrations in the control group. The serum leptinconcentrations in the rugby players were lower than inthe non-sporting subjects despite a similar body fatcontent in both groups. We would therefore suggest thepossibility that regular hard physical training decreasesserum lep…	Physical Health and Function		Cardiovascular Health and Function
Higher antioxidant defences in plasma and low density lipoproteins from rugby players	Evelson et al	2002	Argentina	The aim of the present study was to evaluate the lipid profile and the antioxidant status in a group of well-trained rugby players in comparison with sedentary controls	Lipid and antioxidant profiles were evaluated in 15 well-trained rugby players and 15 sedentary controls. Lipoprotein fractions were separated by sequential ultracentrifugation and α-tocopherol content was determined in each fraction by highperformance liquid chromatography. Susceptibility to in vitro oxidation was also measured in intermediate and low density lipoproteins isolated from both grou…				Amateur Male Rugby Union	Physical Health		Given that intermediate density and low density lipoproteins represent the most atherogenic fraction, this finding, in combination with the improved lipid and antioxidant status, would add to the link between regular physical activity and protection against cardiovascular disease.	Physical Health and Function		Cardiovascular Health and Function
Spirometric and ergospirometric evaluation of wheelchair rugby players	Domaszewska et al	2013	Poland	Spirometric and ergospirometric evaluation of wheelchair rugby players	14 members of the Polish National Wheelchair Rugby Team were recruited for the study. The male players aged 20-40 years with cervical spinal cord injuries underwent spirometric and ergospirometric tests				Wheelchair Rugby	Physical Health		The physiological parameters obtained during the exercise test indicate a higher aerobic capacity of surveyed athletes in comparison with untrained quadriplegics	Physical Health and Function		Cardiovascular Health and Function
Competitive and systematic rugby training increases left ventricular mass and wall thickness within normal ranges and augments risk of left ventricular hypertrophy	Diaz Babio et al	2017	Argentina	To study the the heart of male international-elite rugby players (RP) and untrained, control patients (CP) to test whether competitive and systematic rugby training (CSRT) develops LVH	Between 2015 and 2016, a total of 613 healthy male patients ranging from 14 to 49 y/o, with (RP, n=313) or without (CP, n=300) history of CSRT were prospectively included to be assessed clinically and with 2-D transthoracic echocardiography (TTE). Two independent and experienced physicians measured left atrial volume (LAV) and LV parameters: total mass (LVM), end-diastolic (LVDd) and end-systolic…				Amateur Male Rugby Union	Physical Health		CSRT was associated with increased LV wall thickness and incremented LV mass within normal ranges. Although RP showed higher risk of LVH outcome, no evidence of hypertrophic cardiomyopathy was found in our population.	Physical Health and Function		Cardiovascular Health and Function
Effect of training on physical capacity and physical strain in persons with tetraplegia	Dallmeijer et al	1997	The Netherlands	Therefore, the purpose of the present study was to evaluate the effect of quad rugby training on the physical capacity & strain during standardized ADL in persons with tetraplegia. A trained and untrained (recently started) quad rugby team, as well as a control group of inactive persons with tetraplegia, was therefore followed during a period of 6 months.	The effects of quad rugby training on physical capacity and physical strain during standardized activities of daily living were investigated in 9 trained (A) and 5 untrained quad rugby players (B), and 7 inactive persons with tetraplegia (C) at 0 , 3 and 6 months after the start of a quad rugby training program (l.Sh.w k'1). Physical capacity was measured as maximal isometric strength, peak power…				Wheelchair Rugby	Physical Health		No measurable training effects could be observed for POpeak, VO2peak and physical strain. A significant rise in maximal isometric strength was found in group B after 3 and 6 months of training, whereas no significant changes were found in groups A and C. The results suggest that a higher training frequency and/or intensity may be needed to gain significant training effects for POpeak and VO2peak	Physical Health and Function		Cardiovascular Health and Function
Higher LDL oxidation at rest and after a rugby game in weekend warriors	Chang et al	2002	Taiwan	The present study investigates LDL oxidation and activities of antioxidant enzymes in WW (n = 6) at rest and after a rugby game. The results are compared with those of sedentary controls (CON, n = 10) and trained rugby players (TR, n = 15).	LDL + VLDL conjugated dienes (CD) and thiobarbituric acid reactive substances (TBARS) as well as erythrocyte superoxide dismutase (SOD) and glutathione peroxidase (GPx) activities were analyzed in WW and TR groups before and after a rugby game				Amateur Male Rugby Union	Physical Health		To sum up, in this study, we showed that the WW group had higher LDL oxidation levels than the TR and CON groups at rest and after a rugby game. In addition, the degree of exercise-induced LDL oxidation was higher in the WW than in the TR group.	Physical Health and Function		Cardiovascular Health and Function
Cardiometabolic Risk Reduction Through Recreational Group Sport Interventions in Adults: A Systematic Review and Meta-analysis	Bellissimo et al	2018	USA	To estimate the pooled effects of community-based, recreational-level group sports on cardiometabolic risk factors and fitness parameters among adults.	Systematic Review & Meta-Analysis	NA	NA	23 publications were included (902 participants; mean ± SD age, 46.6±11.7 years), comprising 21 soccer and 2 rugby interventions	Other	Physical Health		We found significant cardiometabolic and fitness improvements following group sport participation, primarily recreational soccer. These findings suggest that group sport interventions are promising strategies for reducing cardiometabolic risk in adults.	Physical Health and Function		Cardiovascular Health and Function
The aging effect on the ratio of total cholesterol to high density lipoprotein between national rugby players and untrained males...7th World Congress on Aging and Physical Activity	Huang et al	2008	Taiwan	Our interest was to detect and compare ratios of TC:HDL-C between national rugby players and untrained persons of various ages	Forty-five national rugby players and 97 male sedentary persons were our subjects; they were divided into four different age groups: 21-30 yrs, 31-40 yrs, 41-50 yrs, and over 51 yrs. Cholesterol was tested by the CHOD-PAP method, and HDL-C was quantified by the phosphotungstic acid- MgCl sub(2) precipitation method. ANOVA, least significant difference (L.S.D.), and t test were used to check the d…				Elite Male Rugby Union	Physical Health		Despite living conditions, the ratio of TC: HDL-C of 4.086 in the sample of national rugby players over 51 yrs of age is very different (p < .01) from the other age groups of players and the untrained group of the same age (3.717). In the groups of 21-30 yrs to 41-50 yrs, values for rugby players were less than those of untrained groups. Thus, it is different inversely in the over-51-yrs group (p…	Physical Health and Function		Cardiovascular Health and Function
Cross-sectional and longitudinal observation of cardiac adaptation in student athletes	Zhao et al	2002	Japan	The purpose of this study was to ascertain whether exercise training cardiac adaptation exists in student rugby athletes, to define an adaptive pattern and to observe the student rugby athletics cardiac adaptive process.	Subjects consisted of 42 male senior high school student rugby athletes, who participated in sports in junior high school, and a control group of sedentary students from the same senior high school who were matched for age. Student athletes were measured once a year over a three-year period. Left ventricular internal dimension at the end-diastole (LVIDd) and left ventricular posterior wall thickn…				Youth Male Rugby Union	Physical Health		The results of this present study suggest that regular rugby exercise training during senior high school obviously induced left ventricular posterior wall thickening in the athletic students. An enlarged left ventricular cavity was observed at the first grade level of senior high school and did not significantly change during three years of senior high school	Physical Health and Function		Cardiovascular Health and Function
Lipids and theirs carriers in sportsmen: the lipoprotein particles	Maso et al	2002	France	This study presents an original approach tothe effect of regular sporting activity on the metabolism of lipids	We have examined the physiological variationsof lipoparticles (Lp) AI, Lp B:CIII, Lp B:E, Lp (a) andthe principal lipid markers in 21 high-level rugby playersand men of the same age group who take part in nosporting activity (reference group;n=35).				Elite Male Rugby Union	Physical Health		The analysis showed a paradoxical decrease in the high-density lipo-protein fraction of cholesterol (P<0.05) and in apo-lipoprotein AI (P<0.0001), and an increase in theapoprotein B/apoprotein AI ratio in the sportsmen,compared with the reference group. According to theseresults, physical activity seems to have only a slight in-fluence on anti-atherogenic serum markers. However,the drop in Lp B:E…	Physical Health and Function		Cardiovascular Health and Function
A quantitative and qualitative evaluation of a 10 week play touch rugby league programme for improving physical activity in adult men and women.	Ashton	2015	UK	The aim of the study was to examine the health benefits and quantify the match demands of a Touch Rugby League program in adult men and women.	Using a non-randomised, mixed model design, 16 participants (male n= 8, female n = 8) completeda 10-week Touch Rugby League program organised by the Rugby Football League. Participants had health markers including resting heart rate, resting blood pressure, cholesterol and anthropometric measure, taken at baseline, week 5 and week 10. GPS data was collected over the 10-week intervention and was u…				Other	Physical Health		Match demands were consistently higher in males than females over the 10-week intervention. Resting heart rate, when compared to baseline, was likely lower and possibly lower at week 10 in males and females respectively. At week 10 diastolic blood pressure was likely lower and very likely lower in men and women respectively when compared to baseline values. High-density lipoprotein cholesterol re…	Physical Health and Function		Cardiovascular Health and Function
Whole-body bone mineral density and bone mineral mass in young adult rugby union players	Bell et al	2000	UK	To identify differences in the whole-body and regional BMD and bone mineral mass in contrasting playing requirements of rugby union football	30 young rugby players assigned to backs/forwards & 21 controls. BMM measured using DXA. All BMD values reported as areal densities.				Amateur Male Rugby Union	Physical Health		There were substantial differences in BMD and BMMc between forwards and backs. Contrasts between forwards and controls were more striking than between backs and controls	Physical Health and Function		Metabolic Health and Function
Long-term rugby practice enhances bone mass and metabolism in relation with physical fitness and playing position	Elloumi et al	2009	Tunisia	We attempted to clarify whether rugby was able to enhance bone mineral density (BMD) and content (BMC) of weight-bearing bones by modifying bone remodelling in relation to physical fitness in male rugby players compared to controls	22 male international rugby players aged 20–31 years (forwards, n = 12 and backs, n = 10) were compared to 14 age-matched controls of the same ethnic origin aged 21–33 years. BMD and BMC were measured by DEXA and bone metabolism was evaluated by specific makers. Physical fitness level was analysed in parallel.				Elite Male Rugby Union	Physical Health		In conclusion, long-term rugby participation is associ-ated with improvement of physical fitness, increased bone mass, Osteocalcin and Type I collagen levels, and enhanced axial andappendicular BMD and BMC in adult athletes. The mus-culo-skeletal adaptations, greater in forwards than in backs,could mimic training responses and therefore explain thebone features, localised in specific stressed reg…	Physical Health and Function		Metabolic Health and Function
Rugby practice and skeleton: correlations between strength, bone mineral density, and biochemical markers of bone remodeling	Elloumi et al	2006	Tunisia	To investigate the relationships among muscular strength, bone mineral density (BMD) and biochemical markers of bone remodeling in healthy active male rugby players.	BMD was measured by dual-energy X-ray absorptiometry. Bone formation was assessed by measurements of circulating osteocalcin (OC). Bone resorption was assessed by urinary levels of cross-linked C-telopeptides of type I collagen (CTX). Twenty rugby players of the Tunisian team gave their consent to participate in the study following an explanation of experimental procedures and purpose. This was d…				Elite Male Rugby Union	Physical Health		According to our results, rugby practice stimulates bone tissue and generate an increase of BMD. Positive significant correlations (P < 0.05 to P < 0.0001) were shown between strength and total and regional (spine, pelvis, and legs which are specifically stressed by this sport participating) BMD. In the same way, the OC, but not CTX, is highly correlated with the same regional and total BMD. The …	Physical Health and Function		Metabolic Health and Function
Bone mineral content and density of Tunisian male rugby players: differences between forwards and backs	Elloumi et al	2006	Tunisia	The purpose of this study was to examine the effects of long-term rugby participation on bone mineral content (BMC) and density (BMD) of male rugby players and to determine if the diverse stimuli elicited by the actions of forwards and backs affect their skeleton differently.	Dual energy X-ray absorptiometry (DXA) scans were obtained from 20 male rugby players (10 Forwards and 10 Backs) who actively participated in rugby for the past 13 yr, and from 29 age matched non active subjects of the same ethnic origin				Elite Male Rugby Union	Physical Health		Rugby players showed greater total body mass, and greater total lean and fat body masses than control subjects (p < 0.01). Whole spine BMC and BMD were 52 % and 15 % higher, respectively, in the rugby players than in the control subjects (p < 0.001). Furthermore, rugby players displayed higher skeletal BMC (40 %, 37 % and 58 % for legs, arms and pelvis, respectively) and BMD (16 %, 21 % and 17 %,…	Physical Health and Function		Metabolic Health and Function
Bone mineral density among female sports participants	Egan et al	2006	UK	The aims of thepresent study were to compare BMD and body composition measures among female participants in three distinctly different sports and investigatedifferences from sedentary control subjects.	Participants were club and university level Rugby Union football players (n= 30, age: 21.4 ± 1.9 years, height: 1.67 ± 0.05 m, mass:73.3 ± 10.7 kg), netball players (n= 20, 20.7 ± 1.3 years, 1.68 ± 0.07 m, 64.3 ± 7.2 kg), distance runners (n= 11, 21.5 ± 2.6 years, 1.68 ± 0.04 m,57.1 ± 6.1 kg), and sedentary controls (n= 25, 21.4 ± 1.1 years; 1.64 ± 0.07 m, 56.8 ± 6.8 kg). With the exception of th…				Amateur Female Rugby Union	Physical Health		All sports groups had higher BMD values than had the controls. Density of bone in the upper body was most pronounced in the rugby football players and least pronounced inthe runners. Positive BMD effects were evident at all sites for the rugby players	Physical Health and Function		Metabolic Health and Function
An observational study on the impact of physical activity type on bone mineral density, hip bone geometry and TBS in a group of adult men	Zakhem et al	2015	Lebanon	To compare bone mineral density, hip bone geometry and trabecular bone score (TBS) in three groups of young males (athletic and sedentary)	Lean mass, fat mass, whole body (WB) bone mineral density (BMD) and bone mineral content (BMC), lumbar spine (L1-L4) trabecular bone score (TBS) and BMD, total hip (TH) and femoral neck (FN) BMD, and geometric indices of the femoral neck (cross-sectional area (CSA), cross-sectional moment of inertia (CSMI), section modulus (Z) and buckling ratio (BR)) were measured by dual-energy X-ray absorptiom…	NA	NA	32 healthy young men (9 rugby players, 12 football and basketball players, and 11 sedentary men), with a mean age of 21 years	Amateur Male Rugby Union	Physical Health		In this study, BMD, L1-L4 TBS and FN geometric indices values (CSA, CSMI and Z) were greater in both groups of athletic young men (rugby and football/basketball players) than in the sedentary group. Moreover, there were significant differences (P < 0.05) between rugby players and football/basketball players regarding BMD and FN geometric indices (CSA and Z)	Physical Health and Function		Metabolic Health and Function
Bone mineral density and body composition among athletes: Lightweight versus heavyweight sports	Van Santen et al	2017	UK	The aim of this study is to evaluate the differences in BMD and body composition among athletes engaged in weight restricted and non-weight restricted sports	BMD and body composition was assessed by Dual-energy X-ray absorptiometry (DXA), utilising either the GE Lunar iDXA or the GE Lunar Prodigy.	NA	NA	Eighty-two males (45. 1% lightweight) and ninety-five females (53. 7% lightweight), median (IQR) age: 22.9 (20. 7-26. 8) years, were analysed.	Other	Physical Health		BMD was significantly higher in lumbar spine (1. 326 +/- 0.158) and body without head (1. 267 +/- 0.111) compared with lightweights (weight limit in sport)(1. 248 +/- 0.147) and 1.164 +/- 0.093, respectively) at p < 0.05. Significant differences were also found between female heavyweight (no weight limit) and lightweight participants at the same measured sites (p < 0.05).	Physical Health and Function		Metabolic Health and Function
Do sporting activities convey benefits to bone mass throughout the skeleton?	Nevill et al	2004	UK	The aim of the present study was to compare the BMD (recorded at nine sites throughout the skeleton) of 106 male athletes (from nine sports) with that of 15 male non-exercising age-matched controls	Multivariate and univariate analyses of covariance were performed to compare the BMD of the nine sports groups with controls (at all sites) using body mass and age as covariates			106 male athletes (from nine sports)	Other	Physical Health		The rugby players' adjusted BMD was the greatest of all sports groups and greater than controls at all nine sites (all P <0.01), with differences ranging from 8% greater in the left arm to 21% in the lumbar spine. These results suggest that sporting activities involving high impact, physical contact and/or rotational forces or strains are likely to convey significant benefits not only to the load…	Physical Health and Function		Metabolic Health and Function
Rugby-specific small-sided games training is an effective alternative to stationary cycling at reducing clinical risk factors associated with the development of type 2 diabetes: a randomized, controlled trial	Mendham et al	2015	Australia	The present study investigated whether rugby small-sided games (SSG) could be an effective alternative to continuous stationary cycling (CYC) training at reducing clinical risk factors associated with the development of type 2 diabetes mellitus (T2DM).	Thirty-three middle-aged (48.6+/-6.6y), inactive men were randomized into a CYC (n=11), SSG (n=11), or control (CON, n=11) group. Participants trained 3d.wk(-1) for 8 weeks, while control participants maintained normal activity and dietary patterns. Exercise duration was matched between groups, which involved CYC or SSG (four quarters, interspersed with 2-min passive recovery). Both training prog…				Male Touch Rugby	Physical Health		Both CYC and SSG increased VO2 at 80%HRmax, and reduced glycated haemoglobin, glucose area under the curve (AUC; SSG, -2.3+/-2.4; CYC -2.2+/-1.6 mmol.L(1)(120 min)(1); p<0.05), and total body fat-mass (SSG -2.6+/-0.9%; CYC -2.9+/-1.1%), compared to no change in CON (p<0.05). SSG reduced insulin AUC (-30.4+/-40.7 micro lU.mL(1)(120 min)(1); p<0.05) and increased total body fat-free mass (1.1+/-1.2…	Physical Health and Function		Metabolic Health and Function
The acute effects of aerobic exercise and modified rugby on inflammation and glucose homeostasis within Indigenous Australians	Mendham et al	2012	Australia	This study investigated the acute effects of twoexercise modes, including cycle ergometry and modifiedrugby on inflammation and glucose regulation within anIndigenous Australian population	Ten sedentary, untrainedIndigenous male participants volunteered to participate andwere not clinically diagnosed with cardiovascular or met-abolic disorders. Following baseline testing and in a ran-domized cross-over design participants completed twoexercise protocols (cycle ergometry and modified rugby) of40-min duration separated by 7 days’ recovery. Fastingvenous blood was collected pre, post,…				Male Touch Rugby	Physical Health		This study identified similaracute inflammatory and glucose regulatory responsesbetween cycle ergometry and modified rugby. Prescribingmodified rugby as a mode of physical activity may provideIndigenous populations with a community-based approachto promote increased engagement in physical activity andassist in the acute regulation of glucose disposal andinflammatory cytokines	Physical Health and Function		Metabolic Health and Function
Effect of rugby training on blood antioxidant defenses in able-bodied and spinal cord injured players	Hubner-Wozniak et al	2011	Poland	To examine the effect of rugby training on the blood antioxidant capacity in able-bodied and wheelchair rugby players with tetraplegia	Four groups of subjects participated in the study: sedentary able-bodied males (group SA, n=19), sedentary males with tetraplegia (group ST, n=10), able-bodied rugby players (group RA, n=22) and wheelchair rugby players with tetraplegia (group RT, n=14). The activities of superoxide dismutase (SOD), glutathione reductase (GR) and catalase (CAT) were determined in erythrocyte hemolysates, whereas …				Other	Physical Health		Adaptive response to training was similar in both able-bodied and wheelchair rugby players, and it was characterized by increased erythrocyte CAT and GPX activities in resting conditions improving resistance to oxidative stress	Physical Health and Function		Metabolic Health and Function
Impact of Wheelchair Rugby on Body Composition of Subjects With Tetraplegia: A Pilot Study	Gorla et al	2016	Brazil	To investigate the longitudinal effects of wheelchair rugby (WR) training on body composition of subjects with tetraplegia.	Individuals with tetraplegia (N=13; age, 26.6±6.0y) were evaluated at baseline and after WR training. Four sessions per week of WR training composed by aerobic and anaerobic activities and technical and tactical aspects of WR. The average time of intervention was 8.1±2.5 months. Body composition assessed by dual-energy x-ray absorptiometry.				Wheelchair Rugby	Physical Health		Regular WR training increased lean mass and bone mineral content in the arms and decreased total body fat mass. Conversely, WR training was associated with decreased bone mineral content in the trunk. These results suggest that regular WR training improves body composition in subjects with tetraplegia.	Physical Health and Function		Metabolic Health and Function
Positive, site-specific associations between bone mineral status, fitness, and time spent at high-impact activities in 16- to 18-year-old boys	Ginty et al	2005	UK	The aim of this cross-sectional study was to evaluate the relationships between whole body andregional bone mineral status and self-reported participation time in no-, low-, moderate-, and high-impact activities and fitness measurementsin 16- to 18-year-old boys.	One hundred twenty-eight boys underwent absorptiometry (DXA) measurements (Hologic QDR 1000W) of bonemineral content (BMC), bone area (BA), and bone mineral density (BMD) at the whole body, hip, spine, and forearm. They also completedthe EPIC (European Prospective Investigation of Cancer) physical activity questionnaire, which allowed categorization of activities accordingto impact and aerobic in…				Youth Male Rugby Union	Physical Health		Boys in the highest third ofhigh-impact activity had significantly greater size-adjusted whole body BMC and total hip BMC compared to subjects in the lowest third[+3.4 (1.2)% for whole body and +8.5 (2.2)% for hip, bothP= 0.001]. Boys in the highest third of high-impact activity spent most activitytime jogging, playing tennis, football and rugby, basketball, and exercising with weights. These fin…	Physical Health and Function		Metabolic Health and Function
Bone mineral density in retired rugby players: initial findings from the UK Rugby Health project	Entwistle et al	2018	UK	To investigate bone mineral density (BMD) at the hip and spine, and the prevalence of low BMD, in a cohort of retired rugby players.	Retired rugby players (77 males; 25.8 years competitive rugby; 10.6 years since retirement; 36 former professional; 41 former amateur level) were separated into two groups: over 50 years of age (n = 27; 57.2 ± 7 years; 175.8 ± 7.6 cm; 94.9 ± 16.9 kg) and under 50 years (n = 50; 40.1 ± 6.2 years; 182.1 ± 6.4 cm; 101.9 ± 13.8 kg). Each participant received dual energy X-ray absorptiometry scans (Lu…				Other	Physical Health		Our findings suggest that participation in high impact sports during young adulthood might not be sufficient to reduce the risk of osteoporosis in later life. Further research is needed to identify why some former rugby players have low BMD and others don't. This research would have the potential to inform assumptions on the role of exercise for bone health throughout the lifespan	Physical Health and Function		Metabolic Health and Function
The prevalence of hand and wrist osteoarthritis in elite former cricket and rugby union players	Jones et al	2019	UK	This study aimed to determine the prevalence of hand and wrist osteoarthritis in former elite cricket and rugby union players, by sport and playing position, and to define the prevalence of severe hand injury, and its association with hand osteoarthritis.	Data from cross-sectional studies of former elite male cricket and rugby players were used to determine the prevalence of hand pain, physician-diagnosed osteoarthritis, and previous severe injury. Multivariable logistic regression was used to determine the association of previous injury with pain and osteoarthritis. Data from 229 rugby players were available. Complete case analysis resulted in 14…				Elite Male Rugby Union	Long-Term Outcomes		Both groups reported similar prevalences of severe hand injury (36.2% of cricket players and 31.4% of rugby players). Hand pain was significantly more prevalent in former cricket players than former rugby players (19.7% versus 10.0%). Among rugby players,forwards reported more hand pain (14.3%) and hand OA (4.8%) than backs. Physican-diagnosed 1) Hand OA: 3.6% 2) Wrist OA: 2.1%	Physical Health and Function		Musculoskeletal Health and Function
Relation between the experience of major joint injury in collegiate athletic activity and arthralgia in later life	Torii	2005	Japan	To investigate the relation between major joint injury in collegiate athletic activity and degenerative joint disorder and pain in later life	Surveyed the alumni of nine athletic clubs aged 45 years old and above considering the characteristics of the athletic activity using a questionnaire	NA	NA	760 alumni responded (the response rate was 36.2%)	Other	Long-Term Outcomes		Significant relations were observed in former rugby players between knee injury and knee pain and between ankle injury and ankle pain	Physical Health and Function		Musculoskeletal Health and Function
Premature onset of degenerative disease of the cervical spine in rugby players	Scher	1990	South Africa	To assess whether rugby players are prone to the development of premature degenerative disease,	Radiographs of the cervical spines of 150 rugby players were compared with a control group of 150 male hospital patients	NA	NA	150 club rugby players	Amateur Male Rugby Union	Long-Term Outcomes		Rugby players showed premature and advanced changes of degenerative disease of the cervical spine when compared with the control group. These changes were most marked in the cervical spines of the tight forwards	Physical Health and Function		Musculoskeletal Health and Function
The cervical spine of professional front-row rugby players: correlation between degenerative changes and symptoms	Hogan et al	2010	Ireland	To evaluate degenerative changes of the C-spine and associated symptomatology in front-row rugby players.	C-spine radiographs from 14 professional rugby players and controls were compared. Players averaged 23 years of playing competitive rugby. Two consultant radiologists performed a blind review of radiographs evaluating degeneration of disc spaces and apophyseal joints. Clinical status was assessed using a modified AAOS/NASS/COSS cervical spine outcomes questionnaire				Elite Male Rugby Union	Long-Term Outcomes		Front-row rugby players exhibited significant radiographic evidence of C-spine degenerative changes compared to the non-rugby playing controls. However, these changes do not manifest themselves clinically or affect activities of daily living	Physical Health and Function		Musculoskeletal Health and Function
Vertebral body anomalies on bone density scans in younger and older retired rugby players: the UK Rugby Health project	Entwistle et al	2018	UK	To quantify vertebral body exclusions in a UK cohort of younger and older retired rugby players.	Retired rugby players (77 males; 10.6 yrs post retirement) aged 50 years or over (n = 27, 57.2 ± 7 years; 175.8 ± 7.6 cm; 94.9 ± 16.9 kg) and under 50 years (n = 50;40.1 ± 6.2 years; 182.1 ± 6.4 cm; 101.9 ± 13.8 kg) received one DXA scan of the anteroposterior lumbar spine (L1-L4; Lunar iDXATM; GE Healthcare, WI; Encore software v 15.0). A DXA scan of the dual femur was also performed. T-scores w…				Other	Physical Health		In this cohort of UK retired rugby players, a high number of vertebral body anomalies were identified. Therefore, our findings demonstrate the need for care when interpreting lumbar spine bone density DXA scans. We also suggest that vertebral body exclusions apply to Z-scores as well as T-scores where there is evidence of FSA or BMD discrepancy. It is recommended that hip scans are conducted alon…	Physical Health and Function		Musculoskeletal Health and Function
Joint replacement and health-related quality of life amongst former rugby players	Davies et al	2017	UK	The aim of this study is to establish the prevalence of joint replacement, hip and knee replacement, and health-related quality of life amongst elite former rugby players, and to compare this with data from nationally representative population-based surveys.	cross-sectional questionnaire study was carried out amongst former university and International rugby players. Players were asked a brief medical history of physician-diagnosed morbidity, questions surrounding their sporting exposure, experience of injury and current health. Players' health-related quality of life was assessed using the EQ-5D. The population-based survey, the English Longitudinal…				Other	Long-Term Outcomes		This study suggests that the prevalence of joint replacement differs between former rugby players and ELSA participants. The odds of joint replacement, particularly hip replacement, were significantly higher for former players than for ELSA participants. Healthrelated quality of life also differs, notably in the domains of pain/discomfort, mobility and usual activities. These findings suggest tha…	Physical Health and Function		Musculoskeletal Health and Function
Is rugby playing load predictive of lower limb osteoarthritis in former international rugby players?	Davies et al	2016	UK	The aim of this study was to describe the prevalence of OA within a cohort or former elite International rugby players, and examine which potentially modifiable rugby-related and injury-related risk factors are most predictive of OA-related outcomes.	A cross-sectional questionnaire was sent to former English International rugby players. Both postal and online recruitment strategies were used. Players received an initial overview describing the study’s aims and objectives before its launch, a formal approach to participate following its launch, and reminder communications. Former players reported their playing history, injury history, family h…				Elite Male Rugby Union	Long-Term Outcomes		This study has described the prevalence of OA-outcomes in this population, and demonstrates a higher prevalence of hip and knee OA than many other population-based studies which range from 5.4 to 14.3 for symptomatic radiographic OA of the knee and 0.7–5.5 for symptomatic radiographic OA of the hip. The association of rugby injury (any, knee and hip) with OA reaffirms data previously published, s…	Physical Health and Function		Musculoskeletal Health and Function
Effect of Exposure to Contact Sport Participation on Cervical Spine Sensorimotor Function	Cheever	2018	USA	The purpose of this study was to examine the effect of contact sport participation on cervical sensorimotor function.	The independent variables were group (rugby, non-contact), sex (male, female), and time (pre-season, post-season). The primary dependent variable was neck position sense error as measured by total neck reposition (TNRE) error and maximum neck reposition error (MaxNRE). Secondary dependent variables included neck disability index, signs and symptom (S/S) number, symptom severity, concussion histor…				Other	Physical Health		Rugby athletes exhibited significantly greater neck reposition sense error than controls. Additionally, concussion S/S scores were related to reposition sense error. Differences in position sense error were not identified between males and females, however females did exhibit less neck strength mirroring previous reports. These findings suggest that exposure to contact sport-related impacts may l…	Physical Health and Function		Musculoskeletal Health and Function
The Incidence of Injuries and Epidemiology of Osteoarthritis in Retired, Amateur, Rugby Union Players	Burgess et al	2017	UK	To determine the Incidence of Injuries and Epidemiology of Osteoarthritis in Retired, Amateur, Rugby Union Players	Two-hundred retired, amateur rugby union players (43±11 years) and two-hundred healthy males (38±8 years) completed online and paper questionnaires, including sections on: sporting, injury and medical history, adapted from USA rugby (2015). Age, height, weight, musculoskeletal disorders, injury history, affected joints, career duration, reason for retirement and previous surgery were recorded				Amateur Male Rugby Union	Long-Term Outcomes		There was a 34.5% (odds ratio (OR) 6.37; 95% confidence interval (CI) 3.83-10.60) higher prevalence of clinical OA within the exrugby union players, when compared to the untrained males. Prevalence of OA increased linearly with career duration (p=0.001) and the site of the disease often reflected the joint where a previous rugby union injury or trauma had occurred.	Physical Health and Function		Musculoskeletal Health and Function
Clinical and radiological cervical spine evaluation in retired professional rugby players	Brauge et al	2015	France	Using clinical and MRI evaluation, we aimed to determine if former professional rugby players had more serious degenerative cervical spine symptoms than the general population.	Two groups, one composed of 101 former rugby players (all men, mean age 40.3 years, range 35–47 years, SD 2.3 years) and the other of 85 male volunteers serving as a control group (mean age 41.6 years, range 35–49 years, SD 4.5 years) were studied. The former rugby players were evaluated on average 5.8 years after retirement (range 1–16 years, SD 3.5 years). The groups were matched in terms of se…				Elite Male Rugby Union	Long-Term Outcomes		Our results indicate that, due to their former sporting activity, young retired professional rugby players have more degenerative cervical lesions and clinical consequences than the general population. Significantly more former rugby players than controls complained of chronic neck pain (51 [50.50%] of 101 vs27 [31.76%] of 85, p = 0.01). Rugby players also had significant reductions of neck mobil…	Physical Health and Function		Musculoskeletal Health and Function
Incidence of cervical spine degenerative complications in former professional rugby players	Brauge et al	2013	France	The aim of this study was todetermine whether professional rugby causes more severe or frequentcervical spine degenerative diseases	The clinical analysis took into account 5criteria: VAS, the NDI score, joint range of movement, the JOA score(neurological examination) and history of cervical spine surgery fordegenerative disease. We also gave 50 of the participants an MRI, again taking into account5 criteria: the Matsumoto score, canal to body ratio, peri-spinalmuscle mass, spinal cord damage (T2 signal hyperintensity orsyring…				Elite Male Rugby Union	Long-Term Outcomes		We report the findings of a study which shed light on howthe spine ages in professional rugby players. Generally speaking,despite a higher incidence of symptoms and more pronounced dam-age seen on the MRI, these former professional sportsmen did notappear to be troubled by their cervical spine. However, it would beinteresting to repeat this type of study after a longer follow-up periodto confirm …	Physical Health and Function		Musculoskeletal Health and Function
Age-related changes in the cervical spines of front-line rugby players	Berge et al	1999	France	The aim of this study was to compare the changes in the cervical spine of players at different points in their careers.	Magnetic resonance imaging scans of the cervical spine were performed on 47 rugby players and 40 age-matched control subjects. A study of cervical spine changes, including spinal curve, spinal constituents, posttraumatic deformities, and degenerative modifications, was completed by a study of cervical measurements				Other	Long-Term Outcomes		Front-line rugby players showed more early degenerative alterations on magnetic resonance imaging scans than did the control subjects of the same age. These changes correlated with age and were probably linked with repetitive cervical trauma throughout the players' careers	Physical Health and Function		Musculoskeletal Health and Function
Sport practice and osteoarthritis of the limbs	Lequesne et al	1997	France	To determine if sports participation a risk factor for osteo-arthritis (OA) of the limbs?	Narrative review	NA	NA	NA	Other	Long-Term Outcome		OA often occurs at a relatively early age in adult life, in certain sports (soccer, rugby, racket sports and other track and field sports) and under certain conditions (high level of practice).	Physical Health and Function		Musculoskeletal Health and Function
Effect of Exposure to Contact Sport Participation on Cervical SpineSensorimotor Function	Cheever et al	2018	USA	The purpose of this study was to examine the effect of contact sport participation on cervical sensorimotor function	he independent variables were group (rugby, non-contact), sex (male, female), and time (pre-season, post-season). The primary dependent variable was neck position sense error as measured by total neck reposition (TNRE) error and maximum neck reposition error (MaxNRE). Secondary dependent variables included neck disability index, signs and symptom (S/S) number, symptom severity, concussion history…				Amateur Male Rugby Union	Physical Health		The present study findings indicate a difference in cervical spine sensorimotor function between collegiate club rugby athletes and controls. Specifically, rugby athletes exhibited significantly greater neck reposition sense error than controls. Additionally, concussion S/S scores were related to reposition sense error. Differences in position sense error were not identified between males and fem…	Physical Health and Function		Musculoskeletal Health and Function
Blood metabolic response to a long-term wheelchair rugby training	Sadowska-Krepa et al	2016	Poland	To evaluate the effects of long-term wheelchair rugby (WR) training on lipid profile, blood antioxidant status and the brain-derived neurotrophic factor (BDNF) level.	Fasting blood samples were collected at rest for assessment of activities of antioxidant enzymes, concentrations of reduced glutathione, uric acid, malondialdehyde (MDA), lipid profile measures and BDNF.			Thirty-two males with chronic cervical spinal cord injury (SCI) assigned into the physically active ‘low-point’ (LP, n=15) or ‘high-point’ (HP, n=8) WR players groups and the sedentary manual wheelchair users (SED, n=9) participated in this study.	Wheelchair Rugby	Physical Health		A voluntary participation in a long-term WR training program has several health promoting outcomes for individuals with chronic SCI. Among the most important are enhancement of the blood antioxidant defense capacity evidenced by lower MDA and higher EAP levels, as well as WR training-induced activation of BDNF signaling.	Physical Health and Function		Immunological Health and Function
Differences in the acute inflammatory and glucose regulatory responses between small-sided games and cycling in sedentary, middle-aged men	Mendham et al	2015	Australia	This study compared the acute inflammatory and glucose regulatory response within and between rugby specific small-sided games and stationary cycling in sedentary, middle-aged Caucasian men.	DESIGN: Nine middle-aged, sedentary men who were free from disease participated in 2 x 40 min exercise conditions (stationary cycling and small-sided games) in a randomised, cross-over design. METHODS: Heart rate and Rating of Perceived Exertion were collected during each bout. Venous blood was collected at fasting, 0, 30, 60 and 240 min post-exercise for measurement of glucose, insulin, cortisol…				Male Touch Rugby	Physical Health		Both small-sided games and stationary cycling conditions were sufficient to stimulate an acute anti-inflammatory response as indicated by the post-exercise elevation of interleukin-6, interleukin-1 receptor agonist and cortisol. The novel findings are that an acute bout of small-sided games bout is capable of maintaining an elevated post-exercise interleukin-6 response and lowered blood glucose c…	Physical Health and Function		Immunological Health and Function
Similar mitochondrial signaling responses to a single bout of continuous or small-sided-games-based exercise in sedentary men	Mendham et al	2016	Australia	This study assessed the mitochondrial related signaling responses to a single bout of noncontact, modified football (touch rugby), played as small-sided games (SSG), or cycling (CYC) exercise	n a randomized, crossover design, nine middle-aged, sedentary, obese men completed two, 40-min exercise conditions (CYC and SSG) separated by a 21-day recovery period. Heart rate (HR) and ratings of perceived exertion (RPE) were collected during each bout. Needle biopsies from the vastus lateralis muscle were collected at rest and 30 and 240 min postexercise for analysis of protein content and ph…				Male Touch Rugby	Physical Health		The similar PGC-1alpha response between intensity-matched conditions suggests both conditions are of similar benefit for stimulating mitochondrial biogenesis. Differences between conditions regarding fluctuation in exercise intensity and type of muscle contraction may explain the increase of p53 and AMPK within CYC and not SSG (noncontact, modified football).	Physical Health and Function		Immunological Health and Function
Immunity, inflammatory and psychophysiological stress response during a competition of professional rugby union	Lindsay et al	2015	NZ	To determine what effect a professional rugby competition has on the immunity, inflammatory and psychophysiological stress response	rine and saliva were collected from 37 professional players at regular intervals throughout a 20 week professional competition. Total neopterin, cortisol and secretory immunoglobulin A were analysed using enzyme linked immunosorbant assay (ELISA) and high performance liquid chromatography (HPLC)				Elite Male Rugby Union	Physical Health		This (Super Rugby) competition of professional rugby does not cause significant changes in psychophysiological stress. Some players however, may become more susceptible to fatigue and infection during the course of a season as a result of suppressed immunity and sustained activation of the inflammatory response.	Physical Health and Function		Immunological Health and Function
Mucosal immune and physiological responses to exercise in wheelchair athletes	Leicht	2012	UK	The aim of this study was to examine salivary secretory immunoglobulin A (sIgA) responses and -amylase activity following constant load and intermittent exercise in elite wheelchair athletes.	Twenty-three wheelchair athletes divided into three subgroups (8 tetraplegic (TETRA), 7 paraplegic (PARA), and 8 non-spinal cord-injured (NON-SCI)) performed two randomised and counterbalanced 60-min sessions on a treadmill. These consisted of a constant load (60% peak oxygen uptake (V O2peak)) and an intermittent (80% and 40%V O2peak) exercise block. Timed, unstimulated saliva samples were obtai…				Wheelchair Rugby	Physical Health		The most extensive study of this thesis, detailed in Chapter 6, showed that single laboratory-controlled 60-min exercise sessions increase both salivary secretory immunoglobulin A (sIgA), a marker of mucosal immunity, and α-amylase, a marker of sympathetic activation in all three disability subgroups. However, the impaired sympathetic nervous system in tetraplegic athletes seemed to influence the…	Physical Health and Function		Immunological Health and Function
The microbiome of professional athletes differs from that of more sedentary subjects in composition and particularly at the functional metabolic level	Barton et al	2018	Ireland	It is evident that the gut microbiota and factors that influence its composition and activity effect human metabolic, immunological and developmental processes. We previously reported that extreme physical activity with associated dietary adaptations, such as that pursued by professional athletes, is associated with changes in faecal microbial diversity and composition relative to that of individ…	Metabolic phenotyping and functional metagenomic analysis of the gut microbiome of professional international rugby union players (n=40) and controls (n=46) was carried out and results were correlated with lifestyle parameters and clinical measurements (eg, dietary habit and serum creatine kinase, respectively)				Elite Male Rugby Union	Physical Health		Our original observation of differences in gut microbiota composition in elite athletes is confirmed and the separation between athletes and those with a more sedentary lifestyle is even more evident at the functional or metabolic level. Microbial-derived SCFAs are enhanced within the athletes. Metabolites such as short-chain fatty acids (SCFAs) have an impact on a range of health parameters incl…	Physical Health and Function		Immunological Health and Function
Thoracoabdominal mobility is improved in subjects with tetraplegia after one year of wheelchair rugby training	Sarro et al	2016	Brazil	To analyse the effect of one year of wheelchair rugby training on thoracoabdominal mobility and its association with lung volume in adults with tetraplegia.	At the beginning and after one year of training, lung volume and tridimensional mobility of four-chest wall compartments (superior and inferior thorax, superior and inferior abdomen) were obtained by spirometric testing and kinematic analysis, respectively.	One year	Participants (10 male adults with chronic spinal cord injury at cervical level) underwent to regular training in wheelchair rugby	10 male adults with chronic spinal cord injury at cervical level - seven completed the study	Wheelchair Rugby	Physical Health		During quiet breathing, significant improvements and linear relationships were observed for the tidal volume (16.9%), superior thorax (61.3%) and inferior thorax mobility (83.7%). During maximal breathing, significant improvements were found for the vital capacity (24.8%) and superior thorax mobility (31.5%). Besides that, there was also a significant linear relationship between the vital capacit…	Physical Health and Function		Respiratory Health and Function
Effects of wheelchair sports on respiratory muscle strength and thoracic mobility of individuals with spinal cord injury	Moreno et al	2012	Brazil	The aim of this study was to evaluate the effects of wheelchair sports on respiratory muscle strength and the thoracic mobility of individuals with spinal cord injury.	Thirty male subjects with chronic spinal cord injury (American Spinal Injury Association Impairment Scale grade A) took part in the study and were divided into four groups: sedentary subjects with quadriplegia (S-QUAD, n = 7), wheelchair rugby athletes with quadriplegia (A-QUAD, n = 8), sedentary subjects with paraplegia (S-PARA, n = 6), and wheelchair basketball athletes with paraplegia (A-PARA,…				Wheelchair Rugby	Physical Health		Physical training seems to have a positive influence on respiratory muscle strength and thoracic mobility of subjects with greater respiratory impairment, such as those with quadriplegia	Physical Health and Function		Respiratory Health and Function
Wheelchair rugby improves pulmonary function in people with tetraplegia after 1 year of training.	Moreno et al	2013	Brazil	This study investigated the effects of 1 year of regular wheelchair rugby training on the pulmonary function of subjects with tetraplegia.	A total of 15 male subjects with tetraplegia participated in this study and were divided into an experimental group of rugby players (n = 8) and a control group (n = 7) of sedentary tetraplegic subjects. Both groups underwent spirometry, and the experimental group was tested before and after participating of a regular 1-year program of wheelchair rugby training.				Wheelchair Rugby	Physical Health		There were a significant increase in forced vital capacity (FVC), forced expired volume after 1 second (FEV1), and maximal voluntary ventilation (MVV, p < 0.05) values after 1 year of regular wheelchair rugby training. The regression analysis between total training time and spirometric variables FVC (r2 = 0.97, p < 0.0001) and MVV (r2 = 0.58, p = 0.02) revealed that the players with longer traini…	Physical Health and Function		Respiratory Health and Function
Reduced processing speed in rugby union players reporting three or more previous concussions	Gardner et al	2010	Australia	The present study sought to examine possible detrimental cognitive effects in a sample of adult male rugby union players who reported a history of three or more concussions compared with those who reported no previous concussions	A computerized neuropsychological battery and a traditional neuropsychological measure of processing speed were administered for this purpose. N=34 of individuals with history of three or more concussions, compared with N=39 of those who reported no previous concussions				Amateur Male Rugby Union	Physical Health		This study has demonstrated that adult male rugby union players reporting three or more previous concussions demonstrate significantly reduced performance on a computerized measure of visual motor speed and a traditional measure of processing speed, compared with rugby union players with no self-reported history of concussion. Interestingly, despite finding no athlete from either group performed …	Physical Health and Function		Neurological Health and Function
Abnormalities of transcranial magnetic stimulation in rugby players: A possible diagnostic tool for the identification of players at risk for symptomatic cervical myeloradiculopathy?	Gaetani et al	2016	Italy	Transcranial magnetic stimulation in rugby players: A possible diagnostic tool for the identification of players at risk for symptomatic cervical myeloradiculopathy?	e performed a neurological evaluation and examined 29 rugby players with electromyography (EMG) and transcranial magnetic stimulation (TMS) studies. 28 healthy volunteers were studied as a control group. A magnetic resonance imaging (MRI) study was performed on players with abnormal findings at the TMS testing.				Other	Physical Health		No neurological anomalies were present in both groups. Significant slower central conduction times were recorded in the TMS studies of the left ulnar nerve, both right and left tibial nerves and, considering the F-wave evaluation, of the right ulnar nerve and the left tibial nerve of the rugby players	Physical Health and Function		Neurological Health and Function
Elevated Systemic Oxidative-Nitrosative Stress and Cerebrovascular Function in Professional Rugby Union Players: The Link to Impaired Cognition	Owens et al	2018	UK	The present study hypothesised that recurrent concussion in current professional rugby union players would result in elevated systemic oxidative-nitrosative stress, reflected by a free radical-mediated reduction in nitric oxide (NO) bioavailability and impaired cerebrovascular and cognitive function.	A longitudinal study design was adopted across the 2017-2018 rugby union season. Pre-season measurements were performed for cerebrovascular function (Doppler ultrasound of middle cerebral artery velocity (MCAv) in response to hypocapnia/normocapnia/hypercapnia), cephalic venous concentrations of the ascorbate radical (A•-, electron paramagnetic resonance spectroscopy), NO (ozone-based chemilumine…			Participants were initially divided into two subgroups; 23 professional rugby union players (aged 26 ± 5 years) and 22 non-concussed controls (27 ± 8 years)	Elite Male Rugby Union	Long-Term Outcomes		The rugby group performed worse in the Ray Auditory Verbal Learning Test B (RAVLT-B, learning, and memory) and the Grooved Pegboard test using both the dominant and non-dominant hands (visuomotor coordination, P < 0.05 vs. control). There were no between-group differences in cerebral perfusion at baseline (MCAv: 54 ± 13 vs. 59 ± 12, P > 0.05). Likewise, no between-group differences in CVRCO2Hypo …	Physical Health and Function		Neurological Health and Function
2015 Parapan American Games: Does physical activity participation improve cerebrovascular function after high-level spinal cord injury?	Phillips et al	2016	Canada	To examine the role physical activity plays in cerebrovascular function after SCI.	Both SCI groups suffered motor complete SCI (>T6 spinal segment). In the seated position, blood velocities in the middle and posterior cerebral arteries (MCA, PCA; transcranial Doppler and beat-by-beat BP (photoplethymography)) were recorded continuously. Thereafter, validated tests of NVC (visual stimulation), dCA (transfer function analysis), attention/concentration (Stroop test) and moderate t…	NA	NA	9 wheelchair rugby national teams [SCIa; n=19]), relatively inactive SCI controls (SCIb; n=9), and age-matched able-bodied individuals (AB; n=11)	Wheelchair Rugby	Physical Health		Physically active individuals with SCI exhibit improved dynamic cerebral autoregulation and cognitive function; these changes may help compensate for the persistent impairment in NVC and thereby prevent vascular cognitive decline	Physical Health and Function		Neurological Health and Function
Cumulative mild head injury (CMHI) in contact sports: an evaluation of pre and post season cognitive profiles rugby players compared with non-contact sport controls at the University of Limpopo	Rapetsoa	2015	South Africa	To evaluate if CMHI in rugby (contact sport) affects the cognitive profiles of rugby players (contact sports), compared with a non-contact sport (volleyball) controls pre and post season at the University of Limpopo (Turfloop campus).	2x Questionnaires, Neuropsychological test battery (A modified version of a neuropsychological test battery utilising specific tests on The Wechsler Adult Intelligence Scale (WAIS IV, 2013) was used in line with previous studies at Rhodes University),			A sample of 18 student rugby players and 18 volleyball (non-contact sport) controls was used.	Youth Male Rugby Union	Long-Term Outcomes		In terms of mean performances the tests did not reveal a consistent pattern of deficits which is typically associated with the effects of Cumulative Mild Head Injuries. There were significant results however, in terms of variability that suggestspotential deficits in attention among the rugby group. The results are therefore indicative of a poorer overall cognitive profile for the rugby playing g…	Physical Health and Function		Neurological Health and Function
Chronic Traumatic Encephalopathy and Neurodegeneration in Contact Sports and American Football	Zuckerman et al	2018	USA	1) Describe the history of CTE, 2) review current CTE definitions, 3) critically evaluate the empiric data, divided into all contact sports and exclusively American football, and 4) summarize notable themes for future research.	Narrative review	NA	NA	NA	Other	Long-Term Outcomes		1) Association between CTE pathology and rugby has been limited to case series 2) Studies of long-term outcomes in former rugby participation have been generally equivocal 3) Former elite rugby athletes who averaged 22 years of sport exhibited similar long-term rates of dementia and depression following retirement compared to population-based SMR (even when controlled for age)	Physical Health and Function	Mental Health and Function	Neurological Health and Function
Cumulative concussion exposure in rugby players: neurocognitive and symptomatic outcomes	Thornton et al	2008	Canada	To determine the impact of self-reported concussion exposure	We evaluated the neurocognitive and symptomatic consequences of concussions in competitive, retired and recreational rugby players who estimated sus- taining between 0 and 24 Grade 2 and 3 concussions. 111 players in total. Of the 124 total participants recruited, a final sample of 111 participants met the study’s inclusion CONCUSSION EXPOSURE IN ATHLETES 399 400 THORNTON ET AL. criteria. All par…				Other	Long-Term Outcomes		The extent of concussion exposure was associated with increased memory complaints and overall post-concussion syndrome endorsements in a dose-dependent manner for retired and older recreational players, but not for those who were younger and playing at more competitive levels. We evaluated the neurocognitive and symptomatic consequences of concussions in competitive, retired and recreational rugb…	Physical Health and Function		Neurological Health and Function
Chronic traumatic encephalopathy: a potential late and under recognized consequence of rugby union?	Stewart et al	2016	Ireland	To present the first comprehensive case report of CTE in a former amateur rugby union player in whom the diagnosis in life was unclear, but confirmed as CTE at autopsy. The implications of this case and our current understanding of CTE are then reviewed.	Case-report & review	NA	NA	One patient	Amateur Male Rugby Union	Long-Term Outcomes		The first comprehensive report of pathologically confirmed CTE in a former rugby union player which adds to current understanding of CTE in contact sports. In particular, the possibility of under-recognition and, with that, under-diagnosis is raised. With increased awareness of CTE, we would suggest the diagnosis might be considered in any patient presenting to dementia services with a prior hist…	Physical Health and Function		Neurological Health and Function
Long-term cognitive outcomes in male and female athletes following sport-related concussions	Sicard et al	2018	Canada	To examine whether sex influences the long-termcognitive outcomes of athletes with a history of concussion	96 asymptomatic student-athletes participated in the study (98 with a HOC; 98 matchedcontrols). The sample included both male (n = 98) and female athletes (n = 98). Participants completed theCogstate brief battery, to which we added a 2-Back condition to increase cognitive load	NA	NA	98 asymptomatic athletes with a history of concussion; 98 matched controls. 30 rugby players in total	Other	Long-Term Outcomes		The current results reaffirm the presence of subtle, yet long-term alterationsin aspects of executive functions following a sport-related concussion	Physical Health and Function		Neurological Health and Function
Neurocognitive vulnerability amongst university rugby players versus noncontact sport controls	Shuttleworth-Edwards et al	2008	South Africa	To determine neurocognitive vulnerability amongst university rugby players versus noncontact sport controls	University rugby players were compared with IQ-equivalent noncontact sports controls on memory and attentional tasks at the pre- and postseason intervals. The final sample consisted of rugby (n = 27; mean age = 19.85, SD = 1.46; mean educational level = 13.22, SD = 1.09) and controls (n = 18; mean age = 23.39, SD = 3.87; mean educational level = 14.78, SD = 1.77).				Amateur Male Rugby Union	Long-Term Outcomes		Results revealed significant lowering for rugby players relative to controls at the postseason interval for attentional tasks with a speeded visuomotor component. Medium to large effect sizes implicate clinically relevant cognitive vulnerability for university-level rugby players in association with years of exposure to repetitive concussive injury.	Physical Health and Function		Neurological Health and Function
Do cumulative mild head injuries in rugby affect neuropsychological performance?: a comparative study between club rugby players and non-contact sport athletes	Pentz	2008	South Africa	This study aimed to investigate subjects exposed to mild head injuries with the aim of determining if neuro logical sequelae are detectable. The objectives ofthis study were to evaluate changes in neuropsychological performance over a period of playing rugby for one full season, which extended over nine months	Neuropsychological functioning in recently concussed athletes was compared with that of non-injured (control) athletes to detect whether neurological sequelae were present.	35 club rugby players and 35 non-contact sports athletes were assessed over a period of 9 months. Both groups underwent pre-season baseline testing and post-season testing. A comprehensive battery of reliable and valid neuropsychological tests was used to assess these subjects, with particular focus on the following 5 areas of cognition: planning, visuo spatial and constructional ability; attenti…			Amateur Male Rugby Union	Long-Term Outcomes		The data showed that significant differences occurred in rugby players participating regularly in the sport over one full season in terms of changes in neuropsychological test performance in a range of cognitive domains, including planning, visual spatial and constructional ability, attention and concentration, memory and verbal fluency.	Physical Health and Function		Neurological Health and Function
Long-term health outcomes after exposure to repeated concussion in elite level: rugby union players	McMillan et al	2017	UK	To describe long-term health outcomes after exposure to repeated concussion in elite level rugby union players	Outcome after exposure to repeated brain injury was investigated in 52 retired male Scottish international rugby players (RIRP) and 29 male controls who were similar in age and social deprivation. Assessment included history of playing rugby and traumatic brain injury, general and mental health, life stress, concussion symptoms, cognitive function, disability and markers of chronic stress (allost…				Elite Male Rugby Union	Long-Term Outcomes		There were no significant associations between number of concussions and performance on cognitive tests. Other than a higher incidence of cardiovascular disease in controls, no group differences were detected in general or mental health or estimates of allostatic load. In RIRP, persisting symptoms attributed to concussion were more common if reporting more than nine concussions (p=0.028), althoug…	Physical Health and Function		Neurological Health and Function
New Zealand rugby health study: motor cortex excitability in retired elite and community level rugby players	Lewis et al	2017	NZ	The aim of the study was to assess measures of corticomotor excitability and inhibition in retired rugby players in comparison to retired non-contact sport players.	The design was a cross-sectional study with three groups of retired athletes: elite rugby (n=23), community level rugby (n=28) and non-contact sport control (n=22). Assessments of corticomotor excitability were made using transcranial magnetic stimulation.				Other	Long-Term Outcomes		Resting motor threshold was significantly higher and long-interval intracortical inhibition was greater in the elite rugby group compared to the control group. Participants in the two rugby groups had sustained significantly more concussions than the control group. We provide some evidence of altered corticomotor excitation and inhibition in retired elite rugby players in comparison to retired no…	Physical Health and Function		Neurological Health and Function
Increased myo-inositol in primary motor cortex of contact sports athletes without a history of concussion	Lefevbre et al	2018	Canada	The objective of the study was to determine whether repetitive hits to the head at a subclinical level are associated with structural and functional brain abnormalities and whether these effects are influenced by high levels of fitness associated with intense physical activity	Seventy-two college students were recruited: 24 nonathletic, 24 athletes practicing a varsity contact sport, and 24 athletes practicing a varsity noncontact sport. They were recruited for a neuropsychological evaluation and a magnetic resonance imaging session that included magnetic resonance spectroscopy of primary motor cortex (M1) and prefrontal cortex and susceptibility-weighted imaging				Other	Long-Term Outcomes		There was no evidence for reduced cognitive performance or presence of micro bleeds in contact sports athletes. Abnormalities in contact sports athletes were found for myo-inositol concentration (mIns) in M1, where levels were significantly higher compared with noncontact sports athletes (p = 0.016) and nonathletes (p = 0.029). In prefrontal cortex, glutamate + glutamine (Glx) was significantly r…	Physical Health and Function		Neurological Health and Function
Normal Cognitive Function Following Self-reported "Dings" In A Cohort Of Collegiate Rugby Players	Hunt et al	2012	USA	This study examined if self-reported “dings” result in decreases in cognitive function as measured by ImPACT	This study was a prospective cohort design. Collegiate rugby football athletes were observed on-field throughout their fall competitive season. Fourteen collegiate rugby players (age 21.5 + 1.34 years) participated in the study. All athletes completed ImPACT to establish a baseline prior to the competitive season. After the completion of their competitive season, all participants were re-tested u…				Amateur Male Rugby Union	Physical Health		These findings suggest that cognitive deficits were not observed following one competitive season of rugby regardless of self-reported dings. A higher mean and confidence interval for impulse control existed which may indicate a long-term effect on impulse control following dings.	Physical Health and Function		Neurological Health and Function
A Comparison of Cognitive Function in Former Rugby Union Players Compared with Former Non-Contact-Sport Players and the Impact of Concussion History	Hume et al	2017	NZ	To investigate differences in cognitive function between former rugby and non-contact-sport players, and assessed the association between concussion history and cognitive function	366 former players (mean ± standard deviation [SD] age 43.3 ± 8.2 years) were recruited from October 2012 to April 2014. Engagement in sport, general health, sports injuries and concussion history, and demographic information were obtained from an online self-report questionnaire. Cognitive functioning was assessed using the online CNS Vital Signs neuropsychological test battery. Cohen’s d effect…				Other	Long-Term Outcomes		The elite-rugby group (n = 103) performed worse on tests of complex attention, processing speed, executive functioning, and cognitive flexibility than the non-contactsport group (n = 65), and worse than the community-rugby group (n = 193) on complex attention. The communityrugby group performed worse than the non-contact group on executive functioning and cognitive flexibility. Compared with US n…	Physical Health and Function		Neurological Health and Function
The End Of Season Electroencephalographic And Neuropsychological Status Of School Rugby Players With Very Mild Traumatic Brain Injury	Dijkstra et al	2005	South Africa	The aim of this study was to compare the end of season neuropsychological, electroencephalographic (EEG) status, and academic performance of players in a secondary school rugby team who, during the course of the season sustained only repetitive vMTBI to those players who sustained mild traumatic brain injuries (MTBI) and a sedentary control group.	A cohort of 20 secondary school male rugby players was followed for a season. A sports physician documented all vMTBI and MTBI injuries. At the end of the season, the players were divided into a vMTBI group [N=11, 17.9 (0.54) yrs], and a MTBI group [N=9, 17.5 (0.88) years] according to the injuries sustained during the season. At the end of the season an EEG-test was done on each subject accordin…				Youth Male Rugby Union	Physical Health		Subtle EEG changes at the end of the rugby season are present in school rugby players who sustained vMTBI and MTBI during a single rugby season.	Physical Health and Function		Neurological Health and Function
Long-term consequences of recurrent sports concussion	Decq et al	2016	France	The study was designed to assess the prevalence of major depressive disorder, mild cognitive disorders and headache in a population of retired high-level sportsmen and rugby players and to study the link between scores evaluating these disorders and the number of reported concussions (RCs).	A total of 239 retired rugby players (RRPs) and 138 other retired sportsmen (ORSs) who had reached the French national or international championship level between 1985 and 1990 filled in a self-administered questionnaire describing their sociodemographic data, comorbidities and reported history of RC. A phone interview was then conducted using validated questionnaires for the detection of major d…				Elite Male Rugby Union	Long-Term Outcomes		More than 20 years after the end of their career, RRPs present higher rates of depression and lower F-TICS-m scores in favor of mild cognitive impairment compared with ORSs. PHQ-9 and HIT-6 scores were significantly associated with the number of RCs. However, no increased incidence of clinically significant episodes of depression or cognitive decline was observed in this population of retired spo…	Mental Health and Function	Physical Health and Function	Neurological Health and Function
Influence of playing rugby on long-term brain health following retirement: a systematic review and narrative synthesis	Cunningham et al	2018	Ireland	The aim of this review was to systematically investigate long-term brain health in retired rugby players.	Systematic Review	NA	NA	This review yielded six studies with an overall methodological quality of ‘moderate’	Other	Long-Term Outcomes		Overall findings are mixed. Methodological biases reduce the overall study quality and limited the conclusions that can be drawn. Findings of decreased fine motor control in retired athletes may be influenced by lack of controlling for evidence of upper limb musculoskeletal injuries. While some studies show evidence of reduced cognitive function among former athletes, the results are not signific…	Physical Health and Function		Neurological Health and Function
Changes in cognitive function and cerebral oxygenation patterns in rugby and non-contact sportspersons over a 15-week season	Clark	2018	South Africa	The primary aim of the study was to determine whether a fifteen-week season elicit a change in the cognitive function and cerebral oxygenation of rugby players when compared with age and sex matched non-contact athletes. The secondary aim was to determine whether changes in sleep quantity and quality, as well as mood states, took place that have the potential to impact the cognitive function and …	Twenty-nine university athletes (16 rugby players (21,3 ± 1,35 yrs) and 13 non-contact sport athletes (20,8 ± 1,97 yrs)) were assessed before and after the 2017 Varsity Cup rugby competition (± 15 weeks). Each participant completed the CNS Vital Signs® Core testing battery, with measurements of cerebral oxyhaemoglobin (∆[O2Hb]), deoxyhaemoglobin (∆[HHb]), tissue oxygenation index (TOI) and normal…				Amateur Male Rugby Union	Physical Health		Overall, cognitive function did not change for either group over the 15-week season (ES = 0,11 and 0,06 for Rugby and Control, respectively). Cerebral oxygenation measurements did not reflect any unexpected changes within the Control group, however, relative ∆[HHb] (ES = 0,57) and nTHI (P = 0,01; ES = 1,29) were significantly increased at post-testing in the rugby players. These variables are con…	Physical Health and Function		Neurological Health and Function
Do concussion dosage, gender or reported symptoms affect long-term cognitive performance and stop-signal reaction times following sportsrelated concussion/mTBI in university rugby players?	Broughton et al	2017	UK	This UK-based study aimed to investigate whether cognitive performance and self-reportedPCS symptoms of athletes (university-level rugby players)relate to SRC, and whether gender moderates these effects	Eighty-six participants completed a questionnairedetailing SRC history (frequency and severity) and self-ratedany enduring symptoms using the Sport ConcussionAssessment Tool 3 (SCAT3) symptom evaluation scales,before completing the CogState Brief Battery and a stop-signalresponse inhibition task, ‘STOP-IT’.				Amateur Male Rugby Union	Physical Health		The results present evidence that SRC has no observable longer-term effects on cognitive test performanceor PCS symptom self-reports in young adults. However, the analysis may have lacked power to detect small effects. Analysis of individual performance over time against baseline scores may be more relevant for accurate diagnosis than relying on normative test scores.	Physical Health and Function		Neurological Health and Function
Cumulative Mild Head Injury in Contact Sport: A Comparison of the Cognitive Profiles of Rugby Players and Non-contact Sport Controls with Normative Data	Bold	1999	South Africa	This study investigates the effects of cumulative mild head injury on the cognitive functioning of elite rugby players	A comprehensive battery of neuropsychological tests was administered to top national (Springbok) rugby players (n=26), national Under 21 rugby players (n=19), and a non-contact sport control group of national hockey players (n=21). The test results of the Total Rugby group (Springbok Rugby and Under 21 Rugby players), the Under 21 Rugby group, the hockey controls, and the Total Rugby and Under 21…				Other	Physical Health		Results showed significant differences in the direction of a poorer performance relative to the norms for the Total Rugby and Under 21 Rugby groups, and for the Total Rugby Forwards and Under 21 Rugby Forwards, on tests sensitive to the effects of diffuse brain damage. On the other hand, the Hockey Control group and the Total Rugby Backs and Under 21 Rugby Backs tended to perform within the norma…	Physical Health and Function		Neurological Health and Function
Cumulative Mild Head Injury in Rugby: A Comparison of Cognitive Deficit and Postconcussive Symptomatology Between Schoolboy Rugby Players and Non-contact Sport Controls	Beilinsohn	2001	South Africa	To investigate the cumulative effects of concussive and subconcussive mild head injury on the cognitive functioning of schoolboy rugby players	A comprehensive battery of neuropsychological tests and a self-report postconcussive questionnaire were administered to top level schoolboy rugby players (n=47), and a non-contact sport control group of top level schoolboy hockey players (n=34). Group comparisons of the percentage of individuals with cognitive deficit were carried out between i) the schoolboy rugby and the schoolboy hockey player…				Youth Male Rugby Union	Physical Health		Results on the neuropsychological test battery did not provide any substantial evidence of a higher level of neuropsychological impairment in the rugby players relative to the control group, or in the rugby forward players relative to the rugby backline players. Results obtained on the postconcussive symptom questionnaire provided tentative indications that the rugby players do report a greater f…	Physical Health and Function	Mental Health and Function	Neurological Health and Function
Neurobehavioural profile following cumulative mild traumatic brain injury in adolescent rugby players in South Africa	Basson et al	2017	South Africa	To investigate the neurobehavioural components of executive dysfunction following sport-related Mild Traumatic Brain Injury (MTBI) in adolescent rugby players over a rugby season	In a non-equivalent quasi-experimental design, a rugby group of Grade 12 adolescents (n = 90) were compared with demographically equivalent noncontact sport controls (n = 59). The Behaviour Rating Inventory of Executive Functions – Self Report (BRIEF-SR) was employed to assess the neurobehavioural component of executive functions . Independent and dependent t-test analyses were conducted to compa…				Youth Male Rugby Union	Rugby & Physical Activity/Physiologic Demand		The overall findings suggest more pronounced deleterious effects on executive functioning from exposure to the concussive and sub-concussive events among the rugby group . High school rugby players experience adverse neurobehavioural effects in executive dysfunction from contact rugby sport injuries. The more pronounced evidence of executive dysfunction at the end-of-season interval in the rugby …	Physical Demand		Neurological Health and Function
Cumulative mild head injury in rugby: cognitive test profiles of professional rugby and cricket players	Ancer	1999	South Africa	To investigate the effects of cumulative concussive and subconcussive mild head injury on the cognitive functioning of professional rugby players	A comprehensive battery of neuropsychological tests was administered to 26 professional rugby players and a noncontact sport control group of 21 professional cricket players. The test performances of the rugby players were compared to those of the cricket players. Within the rugby group, forward and backline players were compared				Elite Male Rugby Union	Physical Health		An analysis of mean score differences between the rugby and cricket group failed to support the presence of brain damage effects in the rugby group. However, there was significantly increased variability of scores for the rugby players compared with the cricket players on tests particularly sensitive to cognitive deficit associated with mild head injury. This invalidates the null indications of a…	Physical Health and Function		Neurological Health and Function
Mild traumatic brain injuries in early adolescent rugby players: Long-term neurocognitive and academic outcomes	Alexander et al	2015	South Africa	The objective was prospectively to investigate differences between young adolescentmale rugby players and non-contact sports controls on neurocognitive test performance over3 years and academic achievement over 6 years	A sample of boys from the same school and grade was divided into three groups:rugby with seasonal concussions (n¼45), rugby no seasonal concussions (n¼21) and non-contact sports controls (n¼30). Baseline neurocognitive testing was conducted pre-season inGrade 7 and post-season in Grades 8 and 9. Year-end academic grades were documented forGrades 6–9 and 12 (pre-high school to year of school leavi…				Youth Male Rugby Union	Physical Health		The outcome of the present study yielded some possibleindications of cognitive vulnerability in association withparticipation in rugby due to risk of cumulative mild traumaticbrain injury, especially on the long-term follow-up of theAcademic Aggregate scores. However, with the exception ofpoorer scores for the Coding Immediate Recall test, thepredominant outcome on the neurocognitive testing was …	Physical Health and Function		Neurological Health and Function
The impact of repeated mild traumatic brain injuries (concussions) on the cognitive and academic functioning of early adolescent rugby union players: A controlled, longitudinal, prospective study	Alexander et al	2007	South Africa	This study investigated, within the context of Brain Reserve Capacity (BRC) theory, whether repeated concussions resulted in residual deficits in cognitive and academic functioning of early adolescent rugby players relative to non-contact sports controls.	Participants were 150 grade 7 preparatory school boys tested pre and post three winter sport seasons using neuropsychological and academic tests. Participants were matched in terms of age, sex, grade, school, language, participation in sport, socio-economic status and estimated IQ				Youth Male Rugby Union	Physical Health		1. early adolescent rugby players experience more concussions than controls; 2. they may be more vulnerable in terms of BRC; 3. they may be compromised in terms of the development of abstract thinking and over time following repeated concussion there is a decline in their academic scores.	Physical Demand		Neurological Health and Function
Concussions in youth rugby: A prospective investigation of enduring neurocognitive and academic effects on players vs non-contact sports controls	Alexander et al	2011	South Africa	The objective was prospectively to investigate differences between young male rugby players and non-contact sports controls on neurocognitive test performance over 3 years and academic achievement over 6 years.	A sample of boys from the same school and grade was divided into three groups: rugby with seasonal concussions (n = 45), rugby with no seasonal concussions (n = 21) and non-contact sports controls (n = 30). Neurocognitive testing was conducted pre- and post-rugby season from Grades 7–9. Academic grades were documented for Grades 6–9 and 12.				Youth Male Rugby Union	Physical Health		A mixed model repeated measures ANOVA used to investigate comparative neurocognitive and academic outcomes between the three sub-groups revealed significantly lower scores for controls on the WISC-III Coding Immediate Recall sub-test. There was a significant interaction effect on the academic measure, with improved scores over time for controls that was not in evidence for either rugby group. Ten…	Physical Health and Function	Wellbeing	Neurological Health and Function
The neurocognitive consequences of sports-related concussion in sports people who have returned to play	Ryland	2013	UK	To investigate the impact of the severity and frequency of SRC on neurocognitive performance in university Rugby Union players.				71 university rugby union players	Amateur Male Rugby Union	Long-Term Outcomes		Severity and frequency of SRC in rugby players were associated with poorer performance in a memory and learning task. These results suggest that cognitive deficits persist following SRC although these are subtle, and restricted to executive function and learning and memory.	Physical Health and Function		Neurological Health and Function
The longevity of international rugby players	Beaglehole et al	1983	NZ	To determine the the longevity of international rugby players	The longevity of New Zealand international rugby players (All Blacks) is compared with the New Zealand male population to test the hypothesis that vigorous leisure time physical activity in the form of rugby in early adulthood is associated with an increased longevity. Data on 822 All Blacks since 1884 are compared with information from New Zealand life tables for males.				Elite Male Rugby Union	Mortality/Longevity		The life expectancy of All Blacks is the same as the general population although non-Maori All Blacks live almost ten years longer than Maori All Blacks.	Physical Health and Function		Longevity
An investigation into the longevity of Cambridge sportsmen	Rook	1954	UK	To determine the longevity of Cambridge University sportsmen	As controls, 761 men who were at the University at the same time were chosen and information was obtained about 710 of them. They were made up of a group of intellectuals numbering 374 men and a group of 336 men chosen at random.				Amateur Male Rugby Union	Longevity		There was no evidence that the sportsmen died at an earlier age than the group chosen at random; the intellectuals lived longer by a period averaging about 1.5 years, but this small difference might well be due to chance. There was some evidence that the prospects of longevity for the heavily built men was not so good as it was for those more lightly built. Of all the varsity sports however, thos…	Physical Health and Function		Longevity
Medical and health histories of Golden Oldies world rugby festival participants	Walsh et al	2011	Australia	To investigate the medical and health histories of participants (aged Football Science. 8, S1, 231. Table 1. Incidence of chronic disorders. 35+) of the 2010 Golden Oldies Rugby Festival (GORF) and compare these trends with Australian Bureau of Statistics data(4) to evaluate if any significant differences occur between a rugby specific population and general Australian population data	Online survey which investigated their medical/health histories	NA	NA	GORF participants (n=279, 35-78 years, X =51.2, +SD =8.4)	Amateur Male Rugby Union	Long-Term Outcomes		GORF participants presented with increased CV and metabolic risks, similar to that found in retired NFL players. Reduced rates of anxiety, arthritis, depression relative to Australian general population.	Physical Health and Function	Mental Health and Function	Multiple sub-themes
Health amongst former rugby union players: A cross-sectional study of morbidity and healthrelated quality of life	Davies et al	2017	UK	To assess morbidity and health-related quality of life (HrQoL) amongst former rugby players, compared to an age-standardised general population sample.	A cross-sectional study of former elite, male, rugby players (n= 259) was undertaken, and standardised morbidity ratios (SMR) calculated, assessing morbidity prevalence relative to English Longitudinal Study of Aging participants (ELSA, n= 5186). HrQoL, measured using the EQ-5D, was compared to a Health Survey for England (HSE, n= 2981) sample.	NA	NA	259 former elite, male, rugby players	Elite Male Rugby Union	Long-Term Outcomes		HrQoL, measured using the EQ-5D, was compared to a Health Survey for England (HSE, n= 2981) sample. In SMR analyses of participants aged 50+, diabetes was signifcantly lower amongstformer players, (0.28, 95% CI 0.11–0.66), whereas osteoarthritis (4.00, 95% CI 3.32–4.81), jointreplacement(6.02, 95% CI 4.66–7.77), osteoporosis (2.69, 95% CI 1.35–5.38), and anxiety (2.00, 95% CI 1.11–3.61) were sign…	Physical Health and Function	Wellbeing	Multiple sub-themes
Osteoarthritis is associated with symptoms of common mental disorders among former elite athletes	Schuring et al	2017	The Netherlands	To establish the association between osteoarthritis (OA) and the occurrence and comorbidity of symptoms of common mental disorders (CMD: distress, anxiety/depression, sleep disturbance, adverse alcohol use) in a group of former elite athletes (including rugby).	Cross-sectional analysis was performed on the baseline questionnaires from fve prospective cohort studies conducted between April 2014 and January 2016 in former elite athletes of rugby. The presence of OA (diagnosed by a medical professional) was examined with a single question and symptoms of CMD were evaluated through multiple validated questionnaires (4DSQ, GHQ-12, PROMIS, AUDIT-C).	NA	NA	295 former rugby players	Elite Male Rugby Union	Long-Term Outcomes		There was a signifcant association between OA and symptoms of distress, sleep disturbance and a comorbidity of symptoms of CMD in former rugby players	Physical Health and Function		Multiple sub-themes
Rugby Fans in Training New Zealand (RUFIT-NZ): a pilot randomized controlled trial of a healthy lifestyle program for overweight men delivered through professional rugby clubs in New Zealand	Maddison et al	2019	NZ	The aims of this research were to: 1) develop the RUFIT-NZ program to be delivered via professional rugby clubs; 2) explore the potential for RUFIT-NZ to help overweight or obese men lose weight and make healthy lifestyle changes by 12 weeks; and 3) evaluate the feasibility of conducting a definitive trial of the RUFIT-NZ program, as assessed by recruitment rates, participant retention, and parti…	To develop the intervention we reviewed content from the FFIT program and evidence-based physical activity, dietary and weight management guidelines, and undertook a series of focus groups and key informant interviews. We then evaluated the feasibility of the intervention in a two-arm, parallel, pilot randomized controlled trial in New Zealand. Ninety-six participants were randomized to either th…				Other	Physical Health		At 12 weeks the mean difference in body weight was 2.5 kg (95% CI -0.4 to 5.4), which favored the intervention. Statistically significant differences in favor of the intervention group were also observed for waist circumference, resting heart rate, diastolic blood pressure, cardiorespiratory fitness, and the proportion of participants that were adherent to 3 or more healthy lifestyle behaviors. T…	Physical Health and Function		Multiple sub-themes
The role of ‘Play Touch Rugby League’and self-paced interval running for improving men’s health	Dobbin	2015	UK		Sixteen men were recruited into a PTRL (n = 8) or RUN (n = 8) group and completed four consecutive weeks of PTRL or RUN. Health markers (resting heart rate (RHR), systolic (SBP) and diastolic (DBP) blood pressure, body mass, fat mass (FM), percentage body fat (%BF), fat free mass (FFM), waist circumference (WC), hip circumference (HC), waist-to-hip ration (WHR), body mass index (BMI), stress and …				Amateur Male Rugby Union	Physical Health		The findings of the present study are in agreement with the literature, suggesting that participation in modified team sports such as PTRL is as, or more, effective than RUN for promoting positive changes in FM, FFM, %BF, SBP, RHR and potentially IL-6 concentration. Further, despite the PTRL group covering more high-intensity distance and achieving a higher peak velocity, sRPE was likely lowerwhe…	Physical Health and Function		Multiple sub-themes
The Epidemiology of Health and Morbidity Amongst Former Rugby Union Players	Davies et al	2017	UK	To determine the prevalence of self-reported physician-diagnosed morbidity amongst former elite rugby players, and compare this with an age and genderstandardised representative national population comparison	A cross-sectional questionnaire study was used. The English Longitudinal Study of Ageing (ELSA), a nationally representative study of English adults, was used as a control population. Age and gender matched standardised morbidity ratios (SMR) were calculated against the ELSA reference population. A post-hoc sensitivity analysis examined morbidity differences between the complete cohort of former …				Elite Male Rugby Union	Long-Term Outcomes		Amongst gender-matched rugby (n=259) and ELSA (n=5186) participants aged 50 and over, diabetes was significantly lower amongst former players (SMR 0.28, CI 0.11 to 0.66), whereas osteoporosis (SMR 2.69, CI 1.35 to 5.38) and osteoarthritis (SMR 4.00) were significantly increased amongst former players. In unadjusted, complete cohort sensitivity analyses, hypertension and heart problems were also d…	Physical Health and Function		Multiple sub-themes
Improved metabolic and cardiorespiratory fitness during a recreational training program in obese children	Calcaterra et al	2013	Italy	To examine the effect of a recreational training program in obese children	We studied a recreational 12-week controlled training program for sedentary obese children, including interactive video games. We enrolled 22 obese subjects (13.23 ± 1.76 years) in an exercise program, implemented twice a week for a 12-week period. The program consisted of a combination of circuit-based aerobics, strength and resistance exercises; specifically soccer, rugby, volleyball and basket…				Other	Physical Health		During the 12-week training program there was a significant decrease in body mass index (BMI) (p = 0.002), SDS-BMI (p = 0.003), waist circumference (p = 0.004), waist circumference/height ratio (p = 0.001), % fat mass (p = 0.001), blood glucose (p = 0.001), homeostasis model assessment for insulin resistance (HOMA-IR) (p = 0.04), triglycerides (p = 0.03) and systolic pressure (p = 0.04) before an…	Physical Health and Function		Multiple sub-themes
Small-sided games training reduces CRP, IL-6 and leptin in sedentary, middle-aged men	Mendham et al	2014	Australia	The aim of the present study was to assess the training-induced changes in pro- and anti-inflammatory cytokines, aerobic capacity and body composition in response to 8 weeks of SSG, stationary cycling (CYC) or control (CON) conditions.	Thirty-three middle-aged, sedentary men were randomized into CYC (n = 11), SSG (n = 11), or CON (n = 11) conditions. The CYC and SSG conditions trained 3 days/week for 8 weeks, whilst CON maintained habitual activity and dietary patterns. Pre- and post-intervention testing included a dual-energy X-ray absorptiometry scan, sub-maximal (80 % maximal heart rate) aerobic capacity (VO2) and fasting ve…				Male Touch Rugby	Physical Health		Cycling and SSG training were both effective at improving CRP, VO2 and TB-FM. Furthermore, SSG training has also shown to be an effective training approach in reducing IL-6 and leptin and increasing muscle mass within sedentary, middle-aged men.	Physical Health and Function		Multiple sub-themes
Physiological and Pathology Demographics of Veteran Rugby Athletes: Golden Oldies Rugby Festival	Climstein et al	2011	Australia	To investigate the demographics of veteran rugby players.	A cross-sectional, observational study was completed using an online web-based questionnaire that consisted of medical history and physiological measures. Data analysis was completed using a one sample t-test (<50yrs versus >50yrs) and Chi-square test. A total of 216 veteran rugby competitors (response rate = 6.8%) representing 10 countries, aged 35-72 yrs (mean 51.2, S.D. ±8.0), participated in …				Amateur Male Rugby Union	Physical Health		Resting blood pressures, lipid profile and glycaemia did not differ significantly between cohorts yet the younger group did not continually demonstrate the highest percentage of optimal readings. This suggests that participation in rugby in advanced age may offer reduced but not eliminated cardiovascular or cardiometabolic risk. Arguably, the younger cohort reported a higher incidence of most chr…	Physical Health and Function		Multiple sub-themes

## Sheet: Mental Health
Bibliographic Information				Aims & Methods						Outcomes			Themes
Title	Authors	Year of publication	Country of origin	Aims/purpose	Methodology	Duration of intervention	Intervention type, comparator, details of these (e.g. duration of the intervention) (if applicable)	Study population and sample size (if applicable)	Form of rugby	Outcomes	Emergenct Themes/Concepts	Key findings	New Initial Theme	? Second Theme	Sub-Theme
Investigating emotional and behavioural sequelae and concussive injury in a sample of adult rugby players in Cape Town, South Africa	Wepener et al	2017	South Africa	To explore the relationship between concussion and emotional and behavioural disturbance in rugby players and non-contact sportsmen	Questionnaires measuring depression, anxiety, general health, anger, impulsivity and alcohol usage	NA	NA	114 participants including rugby players (n = 88) and non-contact sport participants (n = 26), matched on age and intelligence	Amateur Male Rugby Union	Long-Term Outcomes		Results indicated that the groups (rugby players with concussion, rugby players without concussion and non-contact sport control participants) did not differ on emotional and behavioural disturbance and that discriminant functions could not be used to significantly predict group membership	Mental Health and Function		Mental Health and Function
Association among practice frequency on depression and stress among competitive US male wheelchair rugby athletes with tetraplegia	Silveira et al	2017	USA	To determine whether frequency of training is related to self-reported lower psychological distress, defined as depressivesymptomology and perceived stress, among the US male wheelchair rugby athletes with tetraplegia	Survey data were collected on a convenience sample at wheelchair rugby tournaments from January–April 2016.Participants self-reported depressive symptomology (CES-D-10), perceived stress scale (PSS), and frequency of rugby practice.Covariate-adjusted regression models were conducted among the full sample and a subsample of individuals who reported spinal cordinjury (SCI) as the nature of their di…			150 males with tetraplegia	Wheelchair Rugby	Mental Health		Results of the main analyses indicated that practicing wheelchair rugby two times or more (compared to once a week or less) wassignificantly associated with lower depressive symptomology and perceived stress among the full sample and subsample of individualswith SCI. Greater frequency of wheelchair rugby participation was associated with lower levels of psychological distress.	Mental Health and Function		Mental Health and Function
The relationship between psychological wellbeing and health-related physical fitness in professional rugby players	Payne	2016	South Africa	The present study aimed to provide insight into the health of professional rugby players by investigating two components of health, namely psychological and physical wellbeing and the relationship between these facets.	Psychological wellbeing (PW) was measured by the State Trait Personality Inventory (form Y) (STPI-Y) and the Sport Competitive Anxiety Test (adult form) (SCAT-A). Physical wellbeing was defined as health-related physical fitness (HRPF). HRPF was assessed by measurements of the rugby players' body composition, physical fitness, and heart health. Pearson's correlation co-efficient was calculated be…	NA	NA	Two hundred and thirty-eight (238) professional male rugby union players, situated at the Investec Rugby Academy participated in the study	Elite Male Rugby Union	Wellbeing		It is suggested that professional rugby players do not experience optimal psychological wellbeing as they experience negative emotions at a rate and intensity slightly above average. However, it is suggested that they also have highlevels of curiosity, which indicates that they do not suffer from poor PW in totality. This suggests that they might be in a state of overtraining or experiencing over…	Mental Health and Function		Mental Health and Function
The acute effects of participation in sport on mood: The importance of level of "antagonistic physical interaction."	Kerr et al	1994	The Netherlands	To determine the acute effects of participation in sport on mood	109 male university students performed sports with a low (easy running in small groups), medium (basketball), or high (rugby) level of antagonistic physical interaction (API). The Stress-Arousal Checklist (SACL) and the Tension and Effort Stress Inventory (TESI) were completed pre- and postsport sessions.				Amateur Male Rugby Union	Mental Health		Self-reported arousal increased in all conditions. SACL stress scores increased with high level API. Mean positive mood scores for all conditions were approximately double those for unpleasant mood scores. There was an overall decrease in pleasant moods pre- to postsport activity. Unpleasant mood scores decreased with low API, remained unchanged with medium API, and increased with high API. High …	Mental Health and Function		Mental Health and Function
Prevalence and determinants of symptoms of common mental disorders in retired professional Rugby Union players	Gouttebarge et al	2016	The Netherlands	The primary aim of this study was to determine the prevalence of symptoms of common mental disorders (CMD) (distress, anxiety/depression, sleeping disturbance, adverse nutrition behaviour, adverse alcohol behaviour and smoking) among retired professional Rugby Union players. The secondary aim was to explore the associations between stressors (life events, Rugby Union career dissatisfaction) and t…	Therefore, cross-sectional analyses were conducted on baseline questionnaires from an ongoing prospective cohort study of retired professional Rugby Union players. An electronic questionnaire was established using validated questionnaires to assess symptoms of CMD and stressors. The electronic questionnaire was subsequently distributed to 295 retired players by the national Rugby Union players’ a…				Elite Male Rugby Union	Long-Term Outcomes		Prevalence of symptoms of CMD among retired professional Rugby Union player ranged from 15% for smoking and 25% for distress to 62% for adverse nutrition behaviour. There were significant associations between a higher number of life events and distress, anxiety/depression, sleeping disturbance and adverse nutrition behaviour, and also for a higher level of Rugby Union career dissatisfaction and d…	Mental Health and Function		Mental Health and Function
Symptoms Of Common Mental Disorders In Professional Rugby: An International Observational Descriptive Study	Gouttebarge et al	2017	The Netherlands	The aim of the study was to determine the prevalence of symp-toms of common mental disorders among professional rugby players across countries.	A cross-sectional analysis of the base-line questionnaires from an ongoing prospective cohort study was conducted. Nine national players’ associations and three rugby unions distributed questionnaires based on validated scales for assessing symptoms of common mental disorders.				Elite Male Rugby Union	Mental Health		Prevalence (4-week) of symptoms of CMD ranged from 13 % for sleep disturbance to 30 % for anxiety/depression, while around 17 % of the participants reported a comorbidity of two simultaneous symptoms of CMD. Although age- and gender-matched data from the community are difficult to compare with the current sample, this study indicates that professional rugby players may have rates of CMD symptoms …	Mental Health and Function		Mental Health and Function
A 12-month prospective cohort study of symptoms of common mental disorders among professional rugby players	Gouttebarge et al	2018	The Netherlands	The primary aims were to determine the 12-month incidence (and comorbidity) of symptoms of common mental disorders (CMD) among male professional rugby players and to explore their association with potential stressors. A secondary aim was to explore the view of male professional rugby players about the consequences of symptoms of CMD and related medical support/needs.	An observational prospective cohort study with three measurements over a 12-month period was conducted among male professional rugby players from several countries.				Elite Male Rugby Union	Mental Health		A total of 595 players (mean age of 26 years; mean career duration of 6 years) were enrolled, of which 333 completed the follow-up period. The incidence of symptoms of CMD were: 11% for distress, 28% for anxiety/depression, 12% for sleep disturbance, 11% for eating disorders and 22% for adverse alcohol use (13% for two simultaneous symptoms of CMD).	Mental Health and Function		Mental Health and Function
A history of concussions is associated with symptoms of common mental disorders in former male professional athletes across a range of sports	Gouttebarge et al	2017	The Netherlands	The primary aim of this study was to explore the relationship between sports career-related concussions and the subsequent occurrence of symptoms of CMD among former male professional athletes retired from football (soccer), ice hockey and rugby (union).	Cross-sectional analyses were performed on baseline electronic questionnaires from three prospective cohort studies among former male professional athletes retired from football (soccer), ice hockey and rugby (union). The number of confirmed concussions was examined through a single question, while symptoms of distress, anxiety and depression, sleep disturbance and adverse alcohol use were assess…				Elite Male Rugby Union	Long-Term Outcomes		During the first 10 years after their retirement from contact team sports, former professional athletes retired from football, ice hockey, and rugby are 7–11% more likely to report symptoms of common mental disorders (CMD) by every additional sports career-related concussion. Former professional athletes reporting a history of four or five sports career-related concussions are nearly 1.5 times mo…	Mental Health and Function		Mental Health and Function
Measurement of cognitive and somatic anxiety amongst first team high school rugby players	Coetzee et al	2014	South Africa	To determine to what extent the important rugby match alters the cognitive and somatic anxiety experienced by high school rugby players	In order to realize these aims, high school rugby players were compared to male adolescents who were not participating in any type of sport. A purposeful sample of 10 first team high school rugby players and 10 male adolescents not participating in any type of sport was drawn from a high school situated in the Gauteng Province of South Africa. Cognitive anxiety was measured through the administra…				Youth Male Rugby Union	Mental Health		The results indicate that the first team high school rugby players experienced cognitive but not somatic anxiety. The experience of cognitive anxiety might be explained by rugby players‘ participation in an important rugby match.	Mental Health and Function		Mental Health and Function
What position do you play? Eating disorder pathology among rugby players, and the understudied role of player position	Compte et al	2018	Argentina	We aimed to investigate whether ED pathology varied as a function of player position	A cross-sectional study was conducted among 203 rugby players (Mage = 21.78, SD = 3.54) in order assess associations between elevated eating pathology given the players' position, and with ED mediating mechanisms (physical comparison and exercise dependence).				Amateur Male Rugby Union	Physical Health		8.9% (95% CI: 4.9, 12.8) of the participants presented elevated eating pathology. 9% of the rugby players in this study showed high levels of eating pathology, which far exceeds the population prevalence among males, which is thought to be closer to 4%. Players' position, physical comparison and exercise dependence were associated with elevated eating pathology. Forwards tended to endorse binge e…	Mental Health and Function		Mental Health and Function
Reflections on implementing the Active Choices Rugby Programme to enhance mental health and well-being of young men in prison	Woods et al	2019	NA	To assess whether previous reported benefits in wellbeing could be achieved within a young men's prison, and if present, whether this could be potentially attributed to supporting conditions within the sporting intervention related to basic psychological needs theory	14 men participated in the research, from a young men's prison within the United Kingdom. Intervention was a six-week intervention of skill-based rugby sessions. Assessments at start of programme, then at 3/6/8 weeks				Amateur Male Rugby Union	Mental Health		The Active Choices Rugby Proframme for prisoners led to a reported benefit on short-term hedonic mental wellbeing, through increased positive affect and reduced stress and anger (though overall results did not evidence lasting benefits). Quantitative results did not reveal any substantial change in participant satisfaction of basic psychological needs within daily prison environment. This demonst…	Mental Health and Function	Wellbeing	Mental Health and Function

## Sheet: Wellbeing
Bibliographic Information				Aims & Methods						Outcomes			Themes
Title	Authors	Year of publication	Country of origin	Aims/purpose	Methodology	Duration of intervention	Intervention type, comparator, details of these (e.g. duration of the intervention) (if applicable)	Study population and sample size (if applicable)	Form of rugby	Outcomes	Emergenct Themes/Concepts	Key findings	New Initial Theme	? Second Theme	Sub-Theme
Quality of Life of Wheelchair Rugby Players	Zelenka et al	2017	Czech Republic	Show the effect of sport participation in wheelchair rugby on QOL of persons with spinal cord injury.	The WHOQOL-BREF instrument comprises of 26 items, which measure the following four domains: a) physical health (DOM 1), b) psychological health (DOM 2), c) social relationships (DOM 3), and d) environment (DOM 4).	NA	NA	Twenty male wheelchair rugby players – athletes with tetraplegia, who are engaged in regular organized physical activity – wheelchair rugby training and competition (mean age = 32.50, SD = 8.46). Sixteen persons with tetraplegia (all males) who were not actively engaged in sports – not participating in an organized physical activity (mean age = 39.44, SD = 7.44).	Wheelchair Rugby	Wellbeing		The greatest perceived benefits resulting from sport participation were found in domain Physical health. In the agreement with Dixon-Ibarra and Driver (2013), sport participation seems to increase functional independency and improvement in activities of daily living, there is a better mobility and work capacity and much lesser dependency on medical support and better sleep and rest, which can res…	Wellbeing		Wheelchair Rugby
Sports activities and satisfaction of living of menin wheelchair rugby players after cervical spinal cord injury (SCI)	Zwierzchowska et al	2016	Poland	Aim of the current review was to systematically review the available evidence on the epidemiology of time-loss injuries in senior amateur male rugby union players	Questionnaire of life satisfaction LiSat-9	NA	NA	37 males	Wheelchair Rugby	Wellbeing		The level of the life satisfaction wheelchair rugby players is varied due to their age, time since injury and age at injury. Successes in sport significantly affect the level of their life satisfaction.	Wellbeing		Wheelchair Rugby
Wheelchair Rugby Participation as a Path to Independence	Silveira et al	2019	USA	To determine whether the number of years post-injury and years of wheelchair rugby participation impact independence in activities of daily living (ADLs) following spinal cord injury	A cross-sectional study was conducted with 130 wheelchair rugby athletes. Covariate-adjusted OLS regression models were conducted predicting independence as a factor of years post-injury and years spent participating in wheelchair rugby	NA	NA	130 wheelchair rugby athletes	Wheelchair Rugby	Wellbeing		Years playing wheelchair rugby is significantly related to independence among athletes regardless of years post-injury. Encouraging individuals with tetraplegia to participate in wheelchair rugby during rehabilitation may assist with regaining independence.	Wellbeing		Wheelchair Rugby
Psychological impact of wheelchair rugby and differences between American and Japanese players.	Nagata et al	2017	USA	This study investigated the impact of wheelchair rugby participation on three psychological variables	Electronic survey designed to allow for both post-hoc and retrospective pretest measurements.	NA	NA	A total of 84 wheelchair rugby players (58 Americans and 26 Japanese)	Wheelchair Rugby	Mental Health		The results of repeated measures ANOVA indicated a positive effects of wheelchair rugby participation on life satisfaction, self-esteem, and athletic identity	Wellbeing		Wheelchair Rugby
Personal Meaning of Wheelchair Rugby Participation by Five Male Athletes	Litchke et al	2012	USA	To explore the meaning of wheelchair rugby participation as expressed by five athletes	Semi-structured interview & field observation	Field observations were performed at 10 weekend WR practices for a total of 40 hours. Individually, and as group, all five athletes were observed for an additional 8 to 10 hours in informal social settings after practices or on a separate weekend. Observations were also made at one local tournament for 13 hours and one national tournament for 30 hours.	NA	Five male WR athletes with tetraplegia were purposefully selected from two nationally competitive teams		Wellbeing		Themes emerged from their stories about perceived positive outcomes in physical health, psychosocial well-being, expression of an athlete identity, and hold meaning related to playing a full contact sport. The study findings demonstrate the importance and value of sport participation for persons with tetraplegia. These findings support the use of adapted sport as an impactful intervention when wo…	Wellbeing		Wheelchair Rugby
Rugby and physical fitness of people with tetraplegia	Lewandowski et al	2013	Poland	The aim of this paper was to evaluate the influence of practicing rugby on selected components of physical fitness in people with damage to their spinal cord in the cervical segment	The study included 45 young men with tetraplegia, who use an active wheelchair on the everyday basis. An adaptation of Cooper test was used together with an author's questionnaire. The studied group was differentiated according to the period of time of taking part in the sport training or lack thereof.				Wheelchair Rugby	Physical Health		Significant differences in test results were established between subjects practicing rugby for a longer period of time and the characteristics of other groups. It was observed that subjects who did not play rugby were characterized by significantly less favorable results of a trial indirectly reflecting the level of endurance and strength. Study results confirmed a positive influence of attending…	Wellbeing		Wheelchair Rugby
The psychological influences on participation in Wheelchair Rugby: a social relational model of disability	Haslett et al	2017	Ireland	The aim of this study is to interpret influences on participation in disability sport through the conceptual lens of the social relational model (SRM) of disability	Ten Irish adult male athletes with physical disabilities participated in semi-structured interviews exploring the barriers and facilitators that influence participation in Wheelchair Rugby.				Wheelchair Rugby	Wellbeing		Facilitators come in the form of psychological well-being, such as increased autonomy through involvement in Wheelchair Rugby or the influence of the rugby wheelchair on confidence.	Wellbeing		Wheelchair Rugby
Its okay to be a quad: wheelchair rugby players sense of community	Goodwin et al	2009	Canada	To explore the social experience of wheelchair rugby from the perspective of the players.	Eleven national level rugby players (10 males, 1 female with a mean age of 33 years) shared their experiences through the phenomenological methods of semistructured focus group interviews and artifacts				Wheelchair Rugby	Wellbeing		Wheelchair rugby contributed to the athletes’ sense of belonging, a reciprocal sense of influence on their sport, an association with a group that was personally rewarding, and an emotional connection with the sport. The defining element of any community is its psychological health (Obst & White, 2005). The wheelchair rugby community depicted by the athletes of this study was very healthy	Wellbeing		Wheelchair Rugby
Influence of long-term wheelchair rugby training on the functional abilities in persons with tetraplegia over a two-year post-spinal cord injury	Furmaniuk et al	2010	Poland	The aim of this study was to assess the influence of long-term wheelchair rugby training on the functional abilities of persons with tetraplegia over a 2-year period post-spinal cord injury.	Participants: Forty people with incomplete tetraplegia were examined. Participants were divided into 2 groups: a wheelchair rugby training group (n = 20) and a control group (n = 20). Methods: The Wheelchair Skills Test was used to assess functional changes in patients. In order to assess the strength of the 10 key muscles in the upper limb, the American Spinal Injury Association (ASIA) motor sco…				Wheelchair Rugby	Wellbeing		Participation in regular wheelchair rugby training may preserve and augment functional abilities in individuals with incomplete tetraplegia.	Wellbeing		Wheelchair Rugby
Motivational participation incentives of elite quadriplegic rugby athletes	Ferr	1993	USA	The purpose of this thesis was to gain an understanding of the primary motivational factors that influence participation in sport activities by quadriplegic athletes	Subjects were 74 wheelchair athletes competing in the USQRA Quad Rugby Nationals, April 2-5, 1992, at San Jose State University. The subjects were adult males (n = 68) and adult females (n = 6) ranging in age from 19 to 50 years. Subjects completed a 26-item Likert-type questionnaire developed to investigate the select motivation factors that influence their sports involvement in Quad Rugby.				Wheelchair Rugby	Wellbeing		The personal sense of fulfillment, pleasure, and gratification dervied from the experience, and not the tangible rewards and prizes, is a primary motivational incentive for participation in quad rugby. It could be inferred that quad rugby is an enjoyable means of exercising, improving overall fitness, and controlling weight.	Wellbeing		Wheelchair Rugby
How does playing adapted sports affect quality of life of people with mobility limitations? Results from a mixed-method sequential explanatory study	Cote-Leclerc et al	2017	Canada	This study thus aimed to explore the influence of adapted sports on quality of life in adult wheelchair users.	A mixed-method sequential explanatory design was used, including a quantitative and a qualitative component with a clinical research design. A total of 34 wheelchair users aged 18 to 62, who regularly played adapted sports, completed the Quality of Life Index (/30). Their scores were compared to those obtained by people of similar age without limitations (general population). Ten of the wheelchai…				Wheelchair Rugby	Wellbeing		The results of this study show that the quality of life of people with mobility limitations who play adapted sports is similar to that of the general population, except for family-related quality of life. This similarity may be attributable to the positive impact of adapted sport on personal factors and social participation. Participation in adapted sports was identified as having positive effect…	Wellbeing		Wheelchair Rugby
Self-efficacy for quad rugby skills andactivities of daily living	Adnan et al	2001	NZ	The purpose was to compare quad rugby male athletes with a lesion-matched group of persons without quad rugby experience on self-efficacy expectations for performing quad rugby skills (SEQRS) and activities of daily living (SEADL) skills	Each group contained 15 participants. The experimental design was ex post facto.				Wheelchair Rugby	Wellbeing		Mann-Whitney U Tests revealed that quad rugby participants scored significantly higher on measure of ADLs. ( 11 items comprising the SEQRS and 4 of the 28 items comprising SEADL)	Wellbeing		Wheelchair Rugby
Academic achievement in early adolescent rugby players with multiple concussions: A retrospective analysis	Kriel	2012	South Africa	The aim of this study was to determine whether there were differences in academic achievement over time within and between groups of adolescents that had either played rugby and sustained multiple concussions (RC-group; n = 17), or had not played rugby nor sustained any concussions (NRC-group; n = 13).	A retrospective analysis of matched, controlled, prospective, longitudinal data was conducted, using data from Alexander (2009) that investigated the groups‟ neuropsychological performance from gr. 6 to gr. 9. The present study added their gr. 12 academic aggregate scores to the data. Participants were matched on critical attributes, such as age, socio-economic status, gender and general IQ. Data…				Youth Male Rugby Union	Other	Academic Achievement	There is no conclusive evidence that adolescent rugby players perform statistically worse in their academic achievement when measured over a six-year period, the slight decrease in academic results, seen as a downward trend, suggests that rugby players who have sustained multiple concussions might not develop the same complex higher-ordercognitive functions as their non-rugby playing, non-concuss…	Wellbeing		Other
Why American Women Play Rugby	Fields et al	2008	USA	This study examines why US women play rugby given the social stigma surrounding women's participation in sports in general, particularly contact sports, and despite the high risk of injury.	In a survey of their injury history and potential injury risk factors, 339 female rugby players from 14 teams of varied quality and levels of play from a wide geographic area in the United States were asked why they played the sport.				Other	Wellbeing		Their responses indicate that women play rugby because they enjoy the game, they like the aggressive aspects of the sport, they appreciate the social aspects of the game, and they believe the sport provides them with positive benefits, such as increased fitness, confidence, and strength. The results of this study indicate that many women are willing to risk injury for the positive rewards that th…	Wellbeing		Other
School sport and academic achievement	Bradley et al	2013	Ireland	The study will investigate how the particular sport chosen by students participating in school sport during their Leaving Certificate years influences their Leaving Certificate results.	We recorded the Leaving Certificate scores and sports participation from 402 boys graduating from a secondary school in the Ireland during 2008‐2011. Sports participation was assigned 1 of 4 categories: rugby, rowing, soccer, and no sport				Youth Male Rugby Union	Other (please add to emergent themes)	Academic Performance	Participation in sports during the Leaving Certificate years conferred a 25.4‐point benefit to the final Leaving Certificate score. Promoting participation in school sport and providing access to a range of team and individual sports throughout the secondary school years may be a beneficial way to improve students' Leaving Certificate results.	Wellbeing		Other
Old bodies, young hearts: A qualitative exploration of the engagement of older male amateur rugby union players in Taiwan	Cheng et al	2016	Taiwan	To explore why older players have sought to facilitate their continued involvement in an activity that is normally played as a full-contact sport including 1) Why these individuals continue to play, how they perceive their experience and how the sport has evolved to maintain their interest and active involvement	Study participants were specifically chosen from an established Taiwanese rugby union club. Semi-structured qualitative interviews were conducted in 2013 with 15 amateur rugby players aged from 54 to 83 years.				Amateur Male Rugby Union	Wellbeing		Results indicated that the main motivations for participants to continue playing was that it gave them ‘a sense of nostalgia and pride’, ‘lifelong friendship and belonging’, ‘pure joy and passion’, with considerations of being ‘mentally and physically active’, keeping up an involvement in ‘a real man’s sport’ and maintaining a sense of one’s ‘self-identity’ with ‘responsibility and commitment’ to…	Wellbeing		Other
Rugby union among middle-aged American men: An exploration	Dong et al	2013	USA	The purpose of this study is to examine the motivations and participation effects of middle-aged American men participating in rugby in the USA	Data were collected through in-depth interviews during an international amateur masters’ tournament. A total of 14 amateur rugby players with ages ranging from 35 to 52 were interviewed				Amateur Male Rugby Union	Wellbeing		This study found that the motivations for rugby participation were making friends, the love of rugby and self-actualisation.	Wellbeing		Other
Alcohol consumption, athlete identity, and happiness among student sportspeople as a function of sport-type	Zhou et al	2015	UK	To examine the differences in alcohol consumption and psychosocial antecedents between	Questionnaires measured alcohol consumption, athlete identity and subjective happinessfrom a sample of UK university sportspeople	NA	NA	N= 1785; male = 1048	Other	Wellbeing		Team sports players reported significantly greater rates alco-hol consumption, as well as scoring higher than individual sportsplayers on measures of athlete identity and happiness.	Wellbeing		Other
Influence of rugby injuries on players' subsequent health and lifestyle: beginning a long term follow up	Lee et al	2001	UK	To describe the current rugbyplaying status of a cohort of 1169 men whohad previously participated in an epide-miological survey of rugby injuries duringthe 1993–1994 season, and assess theconsequences of rugby injuries sustained.	In May 1998, 911 (78%) mencompleted a questionnaire reporting theircurrent involvement in rugby and theinfluence that the 324 (71%) injuries theyhad sustained four years earlier had sincehad on their health and wellbeing				Amateur Male Rugby Union	Long-Term Outcomes		The most common reasonsgiven by the 390 (43%) ex-players for ceas-ing to play rugby were family (10%),employment (25%), and an injury sus-tained while playing rugby (26%), 80% ofwhich were dislocations, strains, andsprains, mainly to the knee (35%), back(14%), and shoulder (9%). A significantly( ̃2test 21.7, df = 1, p<0.001) higherproportion of current players (90%) un-dertook (non-rugby) sportin…	Wellbeing		Other
Academic consequences of very mild and mild traumatic brain injuries in secondary school rugby players	Laubscher et al	2010	South Africa	The aim of this study was to compare the last two years academic performances of secondary school rugby players suffering very mild (vMTBI), and mild traumatic brain injuries (MTBI) with sedentary control group	A cohort of 35 secondary school male rugby players (divided into a sub-concussive (vMTBI) group (group 1) (n=26) and a concussive (MTBI) group (group 2) (n=9) at the end of a secondary school rugby season and ten (n=10) participants that were not involved in contact sport (control group 3), were used. The academic results of the participants in the subjects Afrikaans, English, Mathematics and Sci…				Youth Male Rugby Union	Wellbeing		Group 1 (vMTBI group) and group 2 (MTBI group) showed a statistically significant (p≤0.05) Decrease in academic performance in Afrikaans in both sub-concussive & concussive groups when compared between year 1 and year 2, (group 1, p=0.017; group 2, p=0.016).	Wellbeing		Other
The neuropsychological and academic consequences of repeated mild and very mild traumatic brain injuries in rugby at a secondary school	Laubscher	2006	South Africa	The objectives of this study were to determine the incidence, the neuropsychological consequences and the effect on the academic performance of repeated mild (MTBI) and very mild traumatic brain injuries (vMTBI) in a secondary school rugby team during one playing season	A cohort of 35 secondary school male rugby players divided into a vMTBI (group 1) (n=26) and a MTBI (group 2) (n=9) from a local secondary school's first and second team, was followed for a full competitive season by a trained Biokineticist, who was present at all the games and contact sessions played. All vMTBI and MTBI and the severity of these injuries were documented. A control (group 3) that…				Youth Male Rugby Union	Wellbeing		The findings of this study indicate a high incidence of vMTBI in a cohort of secondary school rugby players in one season, a statistically significant reduction (p=O.O1 )in delayed memory of the vMTBI rugby players and a statistically significant decrease in academic performance p=O.O17 (group 1) and p=O.O16 (group 2) in the subject Afrikaans from year 1 to year 2 final examinations.	Wellbeing		Other

## Sheet: Injuries
Bibliographic Information				Aims & Methods						Outcomes			Themes
Title	Authors	Year of publication	Country of origin	Aims/purpose	Methodology	Duration of intervention	Intervention type, comparator, details of these (e.g. duration of the intervention) (if applicable)	Study population and sample size (if applicable)	Form of rugby	Outcomes	Emergenct Themes/Concepts	Key findings	New Initial Theme	? Second Theme	Sub-Theme
The Incidence of Injury in Amateur Male Rugby Union: A Systematic Review and Meta-Analysis	Yeomans et al	2018	Ireland	Aim of the current review was to systematically review the available evidence on the epidemiology of time-loss injuries in senior amateur male rugby union players	Systematic Review & Meta-Analysis	NA	NA	6 studies	Amateur Male Rugby Union	Injuries	Male	The overall incidence rate of match injuries within senior amateur rugby union players was 46.8/1000 player hours [95% confidence interval (CI) 34.4-59.2]. Contact events accounted for the majority of injuries, with the tackler more at risk than the player being tackled, and with respective incidence rates of 15.9/1000 player hours (95% CI 12.4-19.5) and 12.2/1000 player hours (95% CI 9.3-15.1).	Acute Health Issues		Injuries
A meta-analysis of injuries in senior men's professional Rugby Union	Williams et al	2013	UK	To assess morbidity and health-related quality of life (HrQoL) amongst former rugby players, compared to an age-standardised general population sample.	Meta-Analysis	NA	NA	Fifteen papers addressing injuries in senior men's professional Rugby Union (from 1995 through September 2012) were included in the review	Elite Male Rugby Union	Injuries	Male	The overall incidence of injuries in senior men's professional Rugby Union matches was 81 per 1,000 player hours (95 % CI 63-105), and 3 per 1,000 player hours (95 % CI 2-4) during training. Estimated mean severity for match injuries was 20 days (95 % CI 14-27), and 22 days (95 % CI 19-24) for training injuries. A higher level of play was associated with a greater incidence of injuries in matches…	Acute Health Issues		Injuries
Incidence and severity of neck injury in Rugby Union: a systematic review	Swain et al	2011	Australia	1) To collate and appraise incidence and severity data for neck injury in Rugby Union 2) To report risk factors for neck injuryin Rugby Union that are supported by incidence and severity data	Systematic Review	NA	NA	33 articles met criteria	Other	Injuries	Mixed	Meaningful understandingof neck injury incidence and severity in RU is restricted tobut a few studies which adopt a comparable methodologicalconstruct.Neck injury incidence ranged from 0.26 (CI: 0.08, 0.93)to 9.17 (CI: 1.89, 26.81)/1000 player hours for mixed RUpopulations that adopted anall inclusivesports injury defi-nition. There is a paucity of both neck injury severity dataand analytical dat…	Acute Health Issues		Injuries
Epidemiology of ankle and foot overuse injuries in sports: A systematic review	Sobhanie et al	2013	The Netherlands	To analyze the methodology of published studies regarding ankle and foot overuse injuries in different sports disciplines and to summarize epidemiological data of ankle and foot overuse injuries.	Systematic Review	NA	NA	A total of 89 articles on 23 sports disciplines were included in this review	Other	Injuries	Male	The highest incidence of foot & ankle injuries, expressed per 1000 athlete per hour exposure, were reported for soccer, 2.7 (95% CI: 0.7–6.9); and rugby, 1.3 (95% CI: 0.8–1.9 game)	Acute Health Issues		Injuries
Rugby and Shoulder Trauma: A Systematic Review	Papalia et al	2015	Italy	To systematically review the available studies concerning shoulder injury in rugby players. The main focus is represented by incidence and percentage of different kind of lesions affecting the shoulder joint	Systematic Review	NA	NA	22 studies included	Other	Injuries	Male	Bankart lesions, SLAP, dislocation and rotator cuff tears (resulting in acute or chronic instability) are the main lesions occurring during the games. Generally, tackle is the main injury-related event	Acute Health Issues		Injuries
Prevalence of laceration injuries in professional and amateur rugby union: a systematic review and meta-analysis	Oudshoorn et al	2017	UK	To summarise the skin and laceration injury prevalence in published epidemiological studies and to investigate any differences in skin injury risk between amateur and professional players.	Systematic Review & Meta-Analysis	NA	NA	Out of these selected studies, 10 studies measured professional athletes and 2 studies observed injuries in an amateur cohort. Eleven out of 12 studies included a completely male cohort, 1 study observed injuries of both males and female rugby players	Other	Injuries	Mixed	Skin injuries account for 5.1% of match injuries and 1.5% of training injuries in rugby union. Amateur players are more likely to sustain a laceration injury during training sessions than professional players.	Acute Health Issues		Injuries
Acute and chronic musculoskeletal injury in Para sport: A systematic review	Ottesen et al	2018	USA	To describe the musculoskeletal (MSK) injury epidemiology of elite and recreational Para athletes and highlight current research gaps	Systematic Review	NA	NA	50 full text articles reviewed	Wheelchair Rugby	Injuries	Not specified	Seated Para athletes sustain upper limb injuries more commonly. Male and female summer Paralympic athletes typically have similar overall injury rates and Football 5-a-Side, Parapowerlifting, Goalball, Wheelchair fencing and Wheelchair rugby are consistently highest-risk sports	Acute Health Issues		Injuries
Men at higher risk of groin injuries in elite team sports: a systematic review	Orchard	2005	Australia	To record incidence of groin and groin region injuries in sports	Systematic Review	NA	NA	31 studies	Elite Male Rugby Union	Injuries	Male	Australian football had a higher rate of groin injuries than rugby league and rugby union. In rugby union, backs (who do more running and kicking) have higher rates of groin injury than forwards (who do more tackling and other body contact). Adductor muscle injuries: Backs 3.1/1000 player hours ; Forwards 2.0/1000 player hours.	Acute Health Issues		Injuries
[truncated: 12 more rows]
